# Supplementary material
Source: Elsevier journal article supplement (https://rcastoragev2.blob.core.windows.net/0738070aabfc357ca7017184cfe6865d/mmc1.pdf)
Supplement: mmc1 [file mmc1.pdf]

## Supplementary appendix

This appendix formed part of the original submission and has been peer reviewed. We post it as supplied by the authors.

Supplement to: The Interleukin 1 Genetics Consortium. Cardiometabolic effects of genetic upregulation of the interleukin 1 receptor antagonist: a Mendelian randomisation analysis. *Lancet Diabetes Endocrinol* 2015; published online Feb 26. [http://dx.doi.org/10.1016/S2213-8587\(15\)00034-0](http://dx.doi.org/10.1016/S2213-8587(15)00034-0).

# Supplementary Material

| CONTENTS                                                                                                                               | PAGE      |
|----------------------------------------------------------------------------------------------------------------------------------------|-----------|
| <b><u>1. Supplementary methods</u></b>                                                                                                 | <b>2</b>  |
| 1.1 <i>Construction of the genetic scores</i>                                                                                          | <b>2</b>  |
| 1.2 <i>Properties of the genetic scores</i>                                                                                            | <b>2</b>  |
| 1.3 <i>Investigating the biological relevance of the genetic scores</i>                                                                | <b>3</b>  |
| 1.4 <i>Description of the 5 studies involved in de novo genotyping with individual-participant data on cardiovascular risk factors</i> | <b>5</b>  |
| 1.5 <i>Genotyping methods and quality control procedures for studies</i>                                                               | <b>9</b>  |
| 1.6 <i>Measurement of inflammation biomarkers</i>                                                                                      | <b>9</b>  |
| 1.7 <i>Systematic review of randomised IL-1<math>\alpha</math>/<math>\beta</math> treatment trials</i>                                 | <b>10</b> |
| 1.8 <i>Definitions of principal disease endpoints</i>                                                                                  | <b>11</b> |
| 1.9 <i>Methods to assess dose response relationships</i>                                                                               | <b>12</b> |
| 1.10 <i>Details of additional risk factors and biomarkers</i>                                                                          | <b>13</b> |
| <b><u>2. Supplementary results</u></b>                                                                                                 | <b>16</b> |
| 2.1 <i>Analysis of randomised trials</i>                                                                                               | <b>16</b> |
| 2.2 <i>Genetic analyses with CHD</i>                                                                                                   | <b>16</b> |
| 2.3 <i>Alternative genetic score</i>                                                                                                   | <b>17</b> |
| 2.4 <i>Exploratory endpoints</i>                                                                                                       | <b>17</b> |
| 2.5 <i>Modelling impact of potential mediation by LDL-cholesterol</i>                                                                  | <b>18</b> |
| <b><u>3. Supplementary tables &amp; figures</u></b>                                                                                    | <b>20</b> |
| <b><u>4. Supplementary references</u></b>                                                                                              | <b>57</b> |
| <b><u>5. List of co-authors and affiliations</u></b>                                                                                   | <b>60</b> |
| <b><u>6. List of collaborators by consortia</u></b>                                                                                    | <b>65</b> |
| <b><u>7. Acknowledgments</u></b>                                                                                                       | <b>87</b> |

## **1. Supplementary methods**

### **1.1 Construction of the genetic scores**

The interleukin-1 receptor antagonist (IL-1Ra) is a naturally occurring inhibitor of interleukin-1 $\alpha/\beta$  signalling. Anakinra, the recombinant form of this protein, is licensed for the treatment of rheumatoid arthritis<sup>1</sup> (**S-Figure 1**). We selected two single-nucleotide polymorphisms (rs6743376 and rs11687782) upstream of the *IL1RN* gene because they had previously been reported to be independently associated with circulating IL-1Ra concentration in a genome-wide association study (GWAS) with imputation<sup>2</sup>. As rs11687782 was not present on the customised gene arrays we had used for *de novo* genotyping, we selected rs1542176 as a proxy, since it is very strongly correlated with rs11687782 ( $r^2=0.99$ ,  $D'=1.0$  in 1000 Genomes Europeans). We used rs6761276 as a proxy for rs6743376 ( $r^2=0.69$ ,  $D'=1.0$  in 1000 Genomes Europeans), since rs6743376 had not been genotyped or imputed in a few of the GWAS consortia we accessed. rs6761276 was the second strongest SNP reported in association with IL-1Ra levels

### **1.2 Properties of the genetic scores**

#### **1.2.1 Properties of our main genetic score**

The SNPs we selected had several properties that made them suitable for use in the construction of a genetic score, reflecting IL-1 $\alpha/\beta$  inhibition. First, our analysis of the Encyclopedia of DNA Elements (ENCODE) suggested that both SNPs are located in a likely gene regulatory region, suggested by the presence of features such as histone modification marks, DNase hypersensitivity sites and transcription factor binding sites (**S-Figure 2**). Second, the two SNPs are un-correlated and have statistically independent effects on IL-1Ra concentration. Third, both SNPs have broadly similar-sized effects on IL-1Ra concentration, ie, per allele effects in standard deviations (95% confidence interval) are: 0.18 (0.13-0.23) for rs1542176, and 0.25 (0.20-0.30) for rs6743376. Hence, combining information on both SNPs by constructing a genetic score should both enhance power and be biologically informative. Fourth, partly as a result of the properties mentioned above, we observed approximately linear associations between the genetic score and IL-1Ra concentration (**S-Figure 3**), which should enhance the power and interpretability of findings. Fifth, because the SNPs we used to construct our genetic score are un-correlated with each other, this independence should reduce the likelihood that our genetic score reflects a pathway other than IL-1 $\alpha/\beta$  signalling (since for confounding by a common alternative pathway to occur it would require that these un-correlated SNPs are both associated with the actual causal trait, either directly or through linkage disequilibrium with a third SNP).

Sixth, we could validly derive our genetic score by involving only aggregated summary-level results from GWAS consortia (using fixed-effect meta-analysis of the summary estimates for the two individual SNPs). This derivation was possible because there is no correlation between the two SNPs in our genetic score in European and South Asian ancestry populations<sup>3</sup>. An important practical implication was our ability to access results from a variety of GWAS consortia that have available only aggregated, consortium-wide summary-level results (ie, most such consortia cannot provide access to summary results from each of their component studies).

### **1.2.2 Using an alternative score as a validity test**

To test the validity of our genetic score, we constructed an alternative genetic score consisting of two further SNPs (rs6759676 and rs4251961) recently identified in a separate GWAS of IL-1Ra concentration<sup>4</sup>. As with the SNPs used in our main genetic score, the SNPs used in the alternative score were: i) located upstream of the *IL1RN* gene, ii) largely un-correlated with each other, and iii) broadly similar in their respective effects on IL-1Ra concentration. However, the SNPs used in the alternative score did not provide completely independent information to those used in the main genetic score because the former were strongly correlated with the SNPs used in our main score, ie,  $r^2$  was 0.67 and  $D'=0.99$  for the correlation between rs6759676 and rs6743376; and  $r^2$  was 0.42 and  $D'=0.85$  for the correlation between rs4251961 and rs1542176 (1000 Genomes, Europeans). A further rationale to use the alternative score was that it enabled analysis of additional data on two of the study's principal outcomes, ie, type 2 diabetes and CHD (Section 2.3).

### **1.3 Investigating the biological mechanism of the genetic score**

We accessed publicly available data from multi-tissue gene expression resources: i) the Multiple Tissue Human Expression Resource (MuTHER) through <http://www.muthet.ac.uk/> and ii) the Genotype Tissue Expression project through <http://www.gtexportal.org/home/>.

We downloaded summary statistics from the MuTHER consortium for the associations of rs6743376 and rs1542176 with any nearby gene (transcription start site within 1MB of the SNP of interest) and derived the association of our score with mRNA levels by performing a fixed-effect meta-analysis of these two SNPs. Data were available on 28 probes, representing 19 genes in the region, in three tissues (skin, fat and lymphoblastoid cell lines) in 850 individuals. We applied a Bonferroni correction for the

number of tissues and probes tested, yielding a significance threshold of  $P=6 \times 10^{-4}$  ( $=0.05/[3 \times 28]$ ).

The score was associated with increased *IL1RN* mRNA levels in subcutaneous adipose tissue and in lymphoblastoid cell lines (**S-Table 1**). Both SNPs in our gene score had associations of similar size and significance levels with *IL1RN* mRNA in both tissues. Furthermore, an examination of this broader region suggested that genetic associations with *IL1RN* mRNA levels were confined to the location near rs6743376 and rs1542176 (dashed lines in **S-Figure 3A**). We observed similar associations to those described above for the alternative genetic score we used.

By contrast, whereas rs6743376 was associated with *IL36B* mRNA in skin, rs1542176 was not associated with *IL36B* mRNA levels ( $P>0.05$ ). Furthermore, an examination of this broader region suggested that genetic associations with *IL36B* mRNA were strongest further upstream of rs6743376 and rs1542176 (**S-Figure 2B**). This observation suggests that the association between rs6743376 and *IL36B* mRNA levels is unlikely to reflect a direct causal relationship. Instead, it is likely to reflect that rs6743376 is in linkage disequilibrium with these upstream variants. Hence, we examined associations of the lead SNP of this upstream region (ie, rs4849144, which was highly significantly associated with *IL36B* mRNA levels;  $P=1.45 \times 10^{-17}$ ) with the same medical conditions and traits for which we had observed highly significant associations with our genetic score. We found that rs4849144 was not associated with rheumatoid arthritis ( $P=0.22$ ), coronary disease ( $P=0.51$ ), or abdominal aortic aneurysm ( $P=0.31$ ) or other traits. Hence, these observations suggest that pathways related to *IL36B* could not materially confound the associations we observed between our genetic score association and the study's outcomes.

We also observed no significant associations between either rs6743376 or rs1542176 with nearby genes in any of 13 different tissues derived from 60 to 170 people in the Genotype Tissue Expression project (i.e. the GTEx webportal returned: "No significant eQTLs were found in all eQTL Tissues").

## **1.4 Description of the 5 studies involved in de novo genotyping providing individual-participant data on cardiovascular risk factors**

**1.4.1 CIHDS/CGPS** This case-control study involved two components, as described previously<sup>5</sup>:

### **The Copenhagen Ischaemic Heart Disease Study (CIHDS)**

This study comprised 5185 cases with myocardial infarction and other major acute coronary syndromes and 10,368 controls matched by age and sex from the Copenhagen General Population Study (CGPS) described below. The cases were recruited from Copenhagen University Hospital during the period from 1991 to 2009. In addition to a diagnosis of acute coronary syndrome, these cases also had stenosis or atherosclerosis on coronary angiography and/or positive results on exercise electrocardiography. Cases were classified by World Health Organization International Classification of Diseases-Eighth Revision, codes 410 to 414; International Classification of Diseases-Tenth Revision, codes I20 to I25, and through review of all hospital admissions and diagnoses entered in the national Danish Patient Registry and all causes of death entered in the national Danish Causes of Death Registry, as previously described<sup>6</sup>.

### **The Copenhagen General Population Study (CGPS)**

The CGPS is a population-based prospective study initiated in 2003 with ongoing enrolment<sup>6</sup>. Participants were selected on the basis of the national Danish Civil Registration System to reflect the adult Danish population age 20 to  $\geq 80$  years. Data were obtained from a questionnaire, a physical examination, and blood samples including deoxyribonucleic acid extraction. Follow-up was 100% complete; that is, no participant was lost to follow-up. As noted above, individuals free of coronary heart disease at the time of examination were selected to serve as controls for CIHDS (Copenhagen Ischaemic Heart Disease Study). Body-mass index was calculated as weight (kg) divided by height squared ( $m^2$ ). Non-fasting plasma levels of total cholesterol, high-density lipoprotein cholesterol (HDL-C), triglycerides and glucose were measured in fresh samples using colorimetric assays. Lipoprotein(a) was measured in the same samples using a turbidimetric assay (DiaSys Diagnostic Systems, Holzheim, Germany). High-sensitivity CRP was measured using nephelometry (Dade Behring, Deerfield, Ill). Fibrinogen, apolipoprotein-A1 and B were measured using colorimetric and turbidimetric assays. The hematologic cell counts were assayed using flow cell and impedance measurements on an ADVIA 2120 Hematology System (Siemens).

#### **1.4.2 Copenhagen City Heart Study (CCHS)**

CCHS is a population-based prospective study initiated in 1976 with follow-up examinations from 1981 to 1983, 1991 to 1994, and 2001 to 2003<sup>7</sup>. Selection of individuals for the CCHS was based on the same criteria as for the CGPS. Information on diagnosis of CHD (defined as WHO ICD 8 410 to 414 and WHO-ICD 10 I20 to I25) was collected and verified from 1976 until 2010 by reviewing all hospital admissions and diagnoses entered in the national Danish Patient Registry, and by reviewing all causes of death entered in the national Danish Causes of Death Registry<sup>5,7</sup>. Again, follow-up was 100% complete for both non-fatal coronary outcomes and mortality. All parameters were assessed in the same fashion as described for the CGPS study, with the exception of high-sensitivity CRP, which was measured by turbidimetry (Dako, Glostrup, Denmark).

#### **1.4.3 European Investigation into Cancer and Nutrition-CVD (EPIC-CVD)**

EPIC is a multi-centre prospective cohort study<sup>8</sup> of 519,978 participants (366,521 women and 153,457 men, mostly aged 35–70 years) recruited between 1992 and 2000 in 23 centres located in 10 European countries. Participants were invited mainly from population-based registers (Denmark, Germany, certain Italian centres, the Netherlands, Norway, Sweden, UK)<sup>9</sup>. Other sampling frameworks included: blood donors (Spain and Turin and Ragusa in Italy); screening clinic attendees (Florence in Italy and Utrecht in the Netherlands); people in health insurance programmes (France); and health conscious individuals (Oxford, UK)<sup>9</sup>. About 97% of the participants were of white European ancestry. Prevalent CHD was ascertained through self-reported history of MI or angina, or registry-ascertained CHD event prior to baseline. Height, weight, waist circumference were measured at baseline according to standardized protocols, and/or self-report. Measurements of all serum biomarkers were performed using a Roche MODULAR ANALYTICS EVO analyser by SHL groep in the Netherlands. HbA1c was measured in erythrocytes. Glomerular filtration rate was estimated based on creatinine levels using the formula developed by the Modification of Diet in Renal Disease Study Group. EPIC-CVD employs a nested case-cohort design, analogous to the EPIC-InterAct study for type-2 diabetes<sup>10</sup> which established a common set of referents through selection of a random sample of the entire cohort ("subcohort"). Incident CHD cases have been defined as fatal and non-fatal MI and other major acute coronary events, according to ICD-10 codes I20-I25. All centres have recorded cause-specific mortality through mortality registries and/or active follow-up, and have ascertained and validated incident fatal and non-fatal CHD through a combination of methods (eg, morbidity registers, general practice records, MONICA registries, self-report, clinical records<sup>9</sup>).

#### **1.4.4 Bangladesh Risk of Acute Vascular Events (BRAVE)**

BRAVE is a retrospective case-control study of first-ever confirmed acute myocardial infarction (MI) in Bangladesh. Patients (male or female; age between 30-80 years) admitted to the emergency rooms of the collaborating hospital in Dhaka, Bangladesh were eligible for inclusion as MI cases if they fulfilled all of the following criteria: i) presented within 24 hours of the onset of sustained clinical symptoms suggestive of MI lasting longer than 20 minutes, including chest pain and breathlessness; ii) had ECG changes indicative of MI (new pathologic Q waves, at least 1 mm ST elevation in any 2 or more contiguous limb leads or a new left bundle branch block, or new persistent ST-T wave changes diagnostic of a non-Q wave MI) with a subsequent confirmation by troponin-I measurements; and iii) had no previous cardiovascular diseases; defined as self-reported history of angina, MI, coronary revascularisation, transient ischaemic attack, stroke or evidence of CHD on prior ECG or in other medical records. Participants were not recruited into BRAVE if any of the following features had been evident: i) a previous history of cardiovascular disease (including self-reported MI, angina, coronary revascularization, stroke, transient ischaemic attack, or peripheral vascular disease, and, in cases, presence of cardiogenic shock); ii) a history of a viral or bacterial infection in the previous 2 weeks; iii) current hospitalization for acute cerebrovascular events; iv) MI secondary to any surgery; v) documented chronic conditions, such as malignancy, any chronic infection, leprosy, malaria or other bacterial/parasitic infections, chronic inflammatory disorders, hepatitis or renal failure on past medical history; vi) pregnancy or related conditions; or vii) unable to provide consent. Controls were hospital based and frequency-matched to cases on age (within 5 year age bands) and sex, and without a self-reported history of cardiovascular disease. Commercial assay kits manufactured by Roche Diagnostics (GmbH, D-68298 Mannheim, Germany) were used to determine total cholesterol, high-density lipoprotein cholesterol, low-density lipoprotein cholesterol, and triglycerides. All analyses were done on Roche automated clinical chemistry analysers, Hitachi 902, Hitachi Ltd, Tokyo, Japan. Blood pressure was measured using a standard sphygmomanometer.

#### **1.4.5 Pakistan Risk of Myocardial Infarction Study (PROMIS)**

PROMIS is a retrospective case-control study of first-ever confirmed acute MI in Pakistan. Patients aged 30-80 years who were admitted to the emergency rooms of nine recruitment centres across Pakistan <sup>11</sup> were eligible for inclusion as cases if they fulfilled the same inclusion criteria as described for BRAVE. The controls in PROMIS were recruited using a similar approach as described above for BRAVE<sup>11</sup>. Nonfasting blood samples were drawn from each participant and centrifuged within 45 minutes of venepuncture. Serum samples were stored at -80°C. Total cholesterol, HDL-C, and



triglyceride concentrations were measured using enzymatic methods (Roche Diagnostics, USA) at the Center for Non-Communicable Diseases, Pakistan. Blood pressure was measured using a standard sphygmomanometer.

Baseline characteristics of the contributing studies are summarized in **S-Tables 2 & 3**.

### **1.5 Genotyping methods and quality control procedures for studies with *de novo* genotyping**

In the five studies described above, we genotyped two variants (rs6743376 and rs1542176) contained in customised versions of the CardioMetaboChip and OmniExpress array (both manufactured by Illumina, San Diego, USA) in two Illumina-certified laboratories located in Cambridge, UK, and Copenhagen, Denmark. Genetic quality control was performed on a chip-wide basis, separately for each study. Individuals were excluded for any of the following reasons: an average heterozygosity of  $> \pm 3$  standard deviations from the mean; a sample call rate  $< 0.97$ ; a mismatch between genotypic and reported gender; cryptically related individuals (ie duplicates, twins or first-degree relatives), including duplicates between the two studies from Copenhagen; and population outliers, based on manual inspection of principal component cluster plots. For each study, the numbers of individuals failing the quality control steps are shown in **S-Table 4**. Hardy-Weinberg-Equilibrium for both SNPs was assessed in controls using Fisher's exact test and the P-values are provided in **S-Table 3**. For each SNP and study, cluster plots were inspected manually. Similar methods were used for genotyping and quality control of studies which provided tabular information on an extended set of cases and controls, which had not been included previously in the largest meta-analysis of GWAS of CHD<sup>12</sup>. Such additional data were made available on 8678 cases and 34742 controls from the deCODE study, 3051 cases and 2432 controls from the German MI Family Study, and 2974 cases and 1643 controls from the Ottawa Heart Genomics Study / Cleveland Clinic GeneBank.

### **1.6 Measurement and analyses of inflammation biomarkers**

Details of inflammation biomarkers and other relevant phenotypic characteristics recorded in the five studies with *de novo* genotyping are summarized in **S-Table 2**. IL-1Ra levels were measured in 3081 individuals of the Cardiovascular Health Study using the Mescoscale chemiluminescent multiplex system (Mesoscale Discovery Technology, Gaithersburg, MD, USA) as described previously<sup>2</sup>. Mean levels (standard deviation) of natural log transformed IL-1Ra, measured in pg/mL, were 5.35 (0.54). Additional data on inflammatory biomarkers have been contributed by the Cardiovascular Health Study, the SardiNIA study and the UK 10K consortium. Measurement of inflammation biomarkers was done using commercial assays, as described previously for the Cardiovascular Health Study and SardiNIA studies<sup>2,13</sup>. Measurement of inflammation biomarkers in the UK10K consortium were done with the Human Cardiovascular Disease (CVD) Panel 2 (acute-phase proteins) LINCoplex Kit (HCVD2-67BK) from Linco (Millipore) and with the Extracellular Protein Buffer Reagent Kit (LHB0001) from Invitrogen, or similar approaches. The UK10K consortium provided summary results

from a meta-analysis of several discovery and replication cohorts, comprising 7,311 individuals for IL-6 and 33,911 for CRP (of which, the ALSPAC study provided results on IL-6 for 4259 individuals and on CRP for 3393 individuals).

### **1.7 Systematic review of randomised IL-1 $\alpha$ / $\beta$ treatment trials**

We searched the Medline electronic library by combining the following terms related to the IL-1 $\alpha$ / $\beta$  blocking agents anakinra, rilonacept, sIL1R1, AMG108 and randomised clinical trials (see **SFigure 4**), without language restriction:

(anakinra OR kineret OR rilonacept OR "IL-1 trap" OR Arcalyst OR IL-1RII OR rhuIL-1Ra OR (recombinant AND human AND ((Interleukin-1 receptor type I) OR IL-1R1 OR IL-1RI) OR AMG108) AND (((randomised OR randomized OR randomization OR Randomisation) AND (trial OR study)) OR ((prospective OR follow-up OR "follow up" OR observational OR phase I OR phase II OR phase IIa OR Phase IIb OR Phase III OR Phase IV) AND (Study OR Trial)) OR (meta analysis OR systematic review OR cochrane review))

Titles, abstracts and full text versions of identified articles were reviewed independently by two investigators (DF & PW). Randomised placebo controlled clinical trials ( $\geq 2$  weeks, ie excluding trials of very short term administration) of an IL-1 $\alpha$ / $\beta$  blocking agent were included. Serious adverse events indicating a potential diagnosis of coronary heart disease were abstracted from parallel group trials only (i.e. no cross-over studies). Information on treatment effect or changes from baseline in cardiovascular risk factors (blood pressure, lipids) and inflammatory mechanism biomarkers (IL-1Ra, IL-6 and CRP) was abstracted from trials reporting on anakinra doses of 75mg or 100mg (the most commonly used dose for treatment of rheumatoid arthritis) from text, tables, figures or supplementary material where available. When not provided in a report, treatment effect was calculated as difference in baseline-corrected group specific differences in biomarkers, or post-treatment levels of biomarkers. The standard error of this difference was calculated by combining the group specific standard deviations<sup>14</sup>. All treatment effects were standardized by dividing effects and standard errors by the combined baseline standard deviations of IL-1Ra, IL-6 or CRP respectively. Results were combined across trials using fixed-effects meta-analysis.

## 1.8 Definitions of principal disease endpoints

Details on the definitions of principal endpoints are provided in **S-Table 5**.

Rheumatoid arthritis: All cases included in this analysis fulfilled the 1987 criteria of the American College of Rheumatology for RA diagnosis <sup>15</sup>.

Type 2 diabetes: Case definition and characteristics of the DIAGRAM consortium included eg. American Diabetes Association (ADA) or WHO criteria, and have been described in detail previously<sup>16</sup>. For EPIC-InterAct, ascertainment of incident type 2 diabetes involved a review of the existing EPIC datasets at each centre using multiple sources of evidence including self-report, linkage to primary-care registers, secondary-care registers, medication use (drug registers), hospital admissions and mortality data. Information from any follow-up visit or external evidence with a date later than the baseline visit was used. To increase the specificity of the case definition we sought further evidence for all cases with information on incident type 2 diabetes from two independent sources at a minimum, including individual medical records review in some centres. Cases in Denmark and Sweden were not ascertained by self-report, but identified via local and national diabetes and pharmaceutical registers and, hence, all ascertained cases were considered to be verified.

Coronary disease: The large majority of patients with coronary disease in studies involving *de novo* genotyping had MI or other major acute coronary events. For the two GWAS consortium included in our analysis (ie, CARDIoGRAM and C4D), definitions of coronary disease used in the component studies have been described previously <sup>17,18</sup>. On the basis of descriptions of the component studies in these two GWAS consortia, we estimate that about 10% of the patients in our analysis of coronary heart disease were defined by angiographic evidence alone (eg, >50% coronary stenosis). Hence, about 90% of the cases included in this analysis had MI or other major acute coronary events. However, apart from the five studies for which we had access to participant-level data, we could not specifically disaggregate results by type of CHD. Nevertheless, our results should predominantly be driven by atherothrombotic coronary events, which comprise the large majority of CHD cases in this analysis.

Ischaemic stroke: Stroke subtyping was done with the Trial of Org 10172 in Acute Stroke Treatment (TOAST) classification system. Brain imaging (CT or MRI) was undertaken for more than 95% of cases.

Abdominal aortic aneurysm: An aneurysm (infrarenal aortic diameter of >30 mm) was diagnosed by either ultrasonography or by cross-sectional imaging, except for patients who presented with acute rupture and for whom the AAA was >55 mm. As we had access only to genetic summary data for aneurysm endpoints, it was not possible to analyse subtype of disease, such as acute rupture or aneurysm progression.

Details on the definitions of exploratory endpoints are provided in **S-Table 6**. Numbers of individuals for principal and exploratory endpoints are provided in **S-Table 7 & 8**, respectively.

### **1.9 Methods to assess dose response relationships**

We approached individual studies of the CARDIoGRAM and C4D consortia to provide tabular data on the number of cases and controls within each category of the genotype combinations for the primary score (rs6743376 vs rs1542176; or rs6761276 vs rs1542176 if the former was not available). This enabled calculation of the odds ratio for CHD for each of the score categories 1-4, comparing it to the reference category (score category 0) separately by study, as well as calculation of a per allele odds ratio, using logistic regression. Results were pooled across studies using fixed-effect inverse-variance weighted meta-analysis. Endpoint definitions, numbers of cases and controls are provided in **S-Table 9**.

### **1.10 Details of additional risk factors and biomarkers**

Details of risk factors and biomarkers in studies providing individual-participant data have been described above and are summarized in **S-Table 2**. These data were supplemented with summary results from genetics consortia. Information on consortia contributing clinical endpoints and methodological details are provided in **S-Table 7 & 8**.

#### **1.10.1 Further details on complex phenotypes**

##### **1.10.1.1 NMR metabolomics methods**

The methods and results of this approach have been described in detail previously<sup>19</sup>. Briefly, metabolites and metabolite ratios were measured in five cohorts from Finland totalling 8330 individuals (**S-Table 10** provides numbers of participants studied for each trait) using a high-throughput serum NMR metabolomics platform<sup>20</sup>. This methodology provided information on 117 serum measures, including lipoprotein subclass distribution and lipoprotein particle concentration, low molecular weight metabolites, such as amino acids, 3-hydroxybutyrate and creatinine, and detailed molecular information on serum lipids, including free and esterified cholesterol, sphingomyelin and fatty acid saturation, and a further 19 characteristics derived from the original measures.

##### **1.10.1.2 Mass spectrometry metabolomics methods**

The methods and results of this approach have been described in detail previously<sup>21</sup>. Briefly, metabolites were measured in two population based cohorts from Germany (KORA study) and the UK (TwinsUK) using a mass-spectrometry based approach (Metabolon Inc). Overall, information on 452 unique metabolites was available in up to 7824 individuals. The metabolites quantified in this study encompass a wide range of relevant biochemical classes (eg, amino acids, acylcarnitines, sphingomyelins, glycerophospholipids, carbohydrates, vitamins, lipids, nucleotides, peptides, xenobiotics and steroids). Further details on the metabolites and the association of the genetic score with each are provided in **S-Table 10**.

##### **1.10.1.3 Imaging markers**

###### *Ultrasound of the common carotid artery*

The methods and results of this approach have been described in detail previously<sup>22</sup>. Briefly, analyses were performed within nine population based cohorts of the Cohorts for Heart and Aging Research in Genomic Epidemiology (CHARGE) Consortium. Each study evaluated the carotid arteries with high-resolution B-mode ultrasonography using previously described reading protocols. For these analyses, we used data from the baseline examination or the first examination in which carotid ultrasonography was obtained. Our primary analysis concerned the common carotid artery using the intima-

media thickness, typically summarized as the mean of the maximum of several measurements. For most studies, this was an average of multiple measurements from both the left and right arteries. All studies measured the far wall and several also included the near wall. Up to 31,207 individuals were included in these analyses (**S-Table 10**). We also examined the atherosclerotic thickening of the carotid artery wall, defined in seven of the nine studies by either the presence of plaque or the proxy measure of stenosis >25%. Data were available for up to 25,176 participants (**S-Table 10**). Specific details for each study's ultrasound, reading and plaque definition protocols have been published previously<sup>22</sup>.

#### *Carotid-femoral pulse wave velocity*

The methods and results of this approach have been described in detail previously<sup>23</sup>. Briefly, analyses were performed within the AortaGen consortium. Measurement of Carotid-Femoral Pulse Wave Velocity (CFPWV) was conducted according to standardized protocols described in detail previously<sup>23</sup>. Nine population based cohorts which had measured CFPWV based on the carotid-to-femoral transit time and distance were included in the meta-analysis. CFPWV increases nonlinearly and exhibits marked variance inflation with advancing age, resulting in a strongly right skewed distribution. In addition, differences in the method used to ascertain transit distance can alter values by up to 30% and the amount of error may be influenced by sex and other anthropomorphic factors such as height and weight. Thus, genetic association analyses were performed using a sex-specific standardized residual that was based on the inverse of CFPWV, which normalizes the distribution, and that was further adjusted for age, age squared, height, and weight. 20,634 participants were included in the present analysis (**S-Table 10**).

#### **1.10.1.4 Immune cell subsets**

The methods and results of this approach have been described in detail previously<sup>24</sup>.

Briefly, detailed flow cytometric measurements were conducted in up to 1,629 participants of the population based SardiNIA study in Sardinia, Italy.

Immunophenotyping was carried out by flow cytometry on fresh blood samples, and cell phenotyping was performed within 2 hr after collection to avoid any time-dependent artefacts. A set of multiplexed fluorescent antibodies was used to characterize the major leukocyte cell populations in peripheral blood, including monocytes, granulocytes, circulating dendritic cells, and lymphocytes subdivided into NK, B, and T cells and their subsets. In particular, regulatory T cells (CD25<sup>hi</sup>, CD127<sup>-</sup>), subdivided into resting, activated, and cytokine-secreting nonsuppressive cells were assessed. The HLA-DR marker was used to assess the activation status of T and NK cells and both the

chemokine receptor CCR7 and the phosphatase CD45RA antigens to distinguish between naive, central memory (CM), effector memory (EM), and terminally differentiated (TD) T cell subsets. Moreover, in selected T cell subpopulations, the positivity for the ectoenzyme CD39 and the CD28 costimulatory antigen was assessed. Finally, cDCs were separated into myeloid (mDCs) and plasmacytoid (pDCs) cells and were further subdivided by the expression of the adhesion molecule CD62L and the co-stimulatory ligand CD86. Summary data from this study on the association of genetic variants with immune cell phenotypes was downloaded from <http://www.irgb.cnr.it/facsdataexplorer>.



## **2. Supplementary results**

### **2.1 Analysis of randomised trials**

We analysed eight randomised placebo-controlled trials of anakinra involving a total of 1125 individuals (**S-Figure 4 & S-Table 11**). One of those trials reported on circulating IL-1Ra, four trials on IL-6, and all reported on CRP (**S-Figure 5 & S-Table 11**). None of the trials reported on other relevant cardiovascular risk factors, such as blood pressure or lipids. Overall, treatment with 75/100mg Anakinra resulted in increased IL-1Ra concentration (in standard deviations [SD] [95% CI]: 4.22 [3.04, 5.40]), decreased IL-6 concentration (in SD [95% CI]: -0.23 [-0.39, -0.07]) and decreased CRP concentration (in SD [95% CI]: -0.17 [-0.21, -0.14]). There was between-trial heterogeneity of treatment effects ( $I^2=75\text{-}82\%$ ; **S-Figure 5**). However, removal of results from a few trials with outlying effects did not affect the overall results.

Our review identified 22 randomised parallel group trials of IL-1 $\alpha/\beta$  inhibitors reporting on serious adverse events (**S-Figure 4**). However, none was designed specifically to evaluate cardiovascular safety. In total, these trials reported on 3654 individuals receiving an IL-1 $\alpha/\beta$  inhibitor and 1583 individuals receiving placebo. The maximum trial duration was 52 weeks (**S-Table 12**). Overall, there were 34 serious adverse events reported that could represent coronary heart disease events. Of these 34 outcomes, 21 (0.6%) were recorded in treatment arms and 13 (0.8%) in placebo groups (**S-Table 12**). However, as most trials did not report the criteria used to diagnose coronary heart disease outcomes, this analysis may be of limited value.

### **2.2 Genetic analyses with CHD**

Using the maximum available dataset, the per-allele odds ratio was 1.03 (95% CI: 1.02-1.04;  $P=3.9\times 10^{-10}$ ) for CHD (**S-Figure 7**). In studies that provided tabular data (**S-Table 9**), we observed an approximately log-linear relationship for the association of the genetic score with risk of CHD (**S-Figures 8 & 9**). There was no good evidence for heterogeneity between studies (**S-Figure 8**).

### 2.3 Alternative genetic score

The variants rs6759676 and rs4251961, recently reported in association with IL-1Ra<sup>4</sup> concentration, are on the CardioMetabochip. As a result, we were able to capitalise on additional data on CHD endpoints from a larger consortium (CARDIoGRAMplusC4D consortium<sup>12</sup>) than the separate CARDIoGRAM and C4D GWAS consortia (ie, the alternative score was studied in 78,171 CHD cases and 148,236 controls, whereas the main score was studied in 70,532 CHD cases and 126,374 controls). For the same reason, we were also able to capitalize on additional data on type 2 diabetes endpoints, from a larger collection from the DIAGRAM consortium<sup>25</sup> (i.e. the alternative score was studied in a total of 41,653 type 2 diabetes cases and 123,521 controls, while the main score was studied in a total of 18,715 type 2 diabetes cases and 61,692 controls).

The per-allele odds ratio for the association of this score with rheumatoid arthritis was 0.96 (0.94-0.98;  $P=4.7 \times 10^{-4}$ ; **S-Figure 10**), very similar to the corresponding odds ratio of 0.97 (95% CI: 0.95-0.99;  $P=9.9 \times 10^{-4}$ ) with our main genetic score.

We used results from CARDIoGRAMplusC4D, which includes a total of 63,746 CHD cases and 130,681 controls, as well as from the five studies for which we conducted *de novo* genotyping. The per-allele odds ratio was 1.03 (1.02-1.04;  $P=3.7 \times 10^{-8}$ ; **S-Figure 11**), which was, again, very similar to the corresponding odds ratio of 1.03 (1.02-1.04;  $P=3.9 \times 10^{-10}$ ) with our main genetic score.

The per-allele odds ratio for the association of this score with abdominal aortic aneurysm was 1.04 (1.01-1.08;  $P=0.011$ ; **S-Figure 10**), somewhat weaker, yet similar to the corresponding odds ratio of 1.08 (1.04-1.12;  $P=1.7 \times 10^{-5}$ ) with our main genetic score.

The per allele odds ratio for the association of this score with type 2 diabetes was 1.00 (0.98-1.01;  $P=0.53$ ), very similar to the corresponding odds ratio of 0.99 (0.97-1.01;  $P=0.47$ ) with our main genetic score.

It is of interest that, although rs6759676 was previously reported to be associated with fasting insulin levels <sup>4</sup> ( $P=0.009$ ;  $n=13,616$ ), we did not find evidence to support this association, despite our involvement of three times as many participants as in the earlier study ( $P=0.55$ ;  $n=38,238$ ).

### 2.4 Exploratory endpoints

We observed no clear associations of the genetic score with subtypes of ischaemic stroke (**S-Figure 12**). As discussed in the main text, the genetic score was associated with small increases in total- and LDL-cholesterol, but there was no clear evidence of

associations with any of the other cardiometabolic risk factors studied (**S-Figure 13**). Furthermore, there were no clear associations observed with any of the additional, complex phenotypes, including metabolomics profiles, cardiovascular imaging markers or immune cell subsets (**S-Table 10**). There were also no clear associations observed with any of the other clinical endpoints we studied (**S-Figure 14**), including conditions that might represent potential safety concerns for long-term IL-1 inhibition (**S-Figure 15**). Individual SNP associations for all endpoints are presented in **S-Figure 16**. However, as noted in the main text, the power to study these conditions varied considerably, reflecting differences in amount of information in various disease-specific GWAS consortia.

## **2.5 Modelling impact of potential mediation by pro-atherogenic lipids**

We observed that the genetic score was associated with small increases in total cholesterol (per allele in SD [95% CI]: 0.016 [0.009-0.022]), LDL-cholesterol concentration (per allele in SD [95% CI]: 0.014 [0.007-0.022]), and triglycerides (per allele in SD [95% CI]: 0.009 [0.003-0.015]). To estimate how much of the association we observed between the genetic score and CHD could be explained by LDL-cholesterol concentration, we estimated the causal effect of life-long alteration in LDL-cholesterol concentration in two ways. First, our genetic estimation used published reports that identified genetic variants robustly and exclusively associated with LDL-cholesterol levels<sup>26</sup>. The odds ratio for CHD was 0.33 per 30% lifelong genetic reduction (equivalent to a -0.357 unit change on the log-scale) in LDL-cholesterol concentration<sup>26</sup>. The standard deviation of log-transformed LDL-c was estimated as 0.267 in the subcohort participants of EPIC-CVD. On this basis, the odds ratio for a 0.014 standard deviation increase in LDL-c would be expected to be 1.012 ( $=\exp(\log(0.33)/-0.357*0.267*0.014)$ ), which is approximately 38% of the increase in CHD risk associated with the genetic score (odds ratio: 1.032). Secondly, our phenotypic estimation used individual-participant data on serum lipid concentrations from 302,430 participants in the Emerging Risk Factors Collaboration<sup>27</sup>. We found that a 1-SD higher long-term average ("usual") non-HDL-cholesterol concentration (ie, corrected for regression dilution bias) is associated with a hazard ratio of 1.56 (1.47-1.66)<sup>27</sup>. An increase of 0.016 standard deviations in total cholesterol would therefore be expected to result in a hazard ratio of 1.007, which is approximately 22% of the observed increase in CHD risk of the genetic score. Hence, these two complementary approaches yielded broadly concordant findings, suggesting that LDL-cholesterol concentration could account for 20-40% of the association we observed between the genetic score and CHD.

Our rationale to conduct modelling for LDL-C but not triglycerides was two-fold. First, as we conducted exploratory analyses of the genetic score in relation to several cardiovascular traits, cautious interpretation is needed. The P-value for the LDL-C result was more extreme than the P-value for the triglyceride result. Hence, our modelling of LDL-C as a potential mediator is less speculative than it would have been for triglycerides. Second, whereas LDL-C concentration is itself regarded as a causal risk factor in CHD, triglyceride concentration in itself is unlikely to be a causal risk factor. Instead, there is good evidence that triglyceride-related pathways are causally relevant to CHD, but the exact causal component(s) of this pathway awaits identification<sup>28,29</sup>. Hence, a modelling analysis for triglyceride concentration would have involved extra assumptions compared to that for LDL-C concentration.

### 3. Supplementary tables & figures

**S-Table 1: Association of the genetic score with expression levels of nearby genes**

| Gene         | Tissue                    | Probe        | Main score |                      |                |                 | Alternative score |                      |                |                 |
|--------------|---------------------------|--------------|------------|----------------------|----------------|-----------------|-------------------|----------------------|----------------|-----------------|
|              |                           |              | Direction* | P                    | I <sup>2</sup> | P heterogeneity | Direction         | P                    | I <sup>2</sup> | P heterogeneity |
| <i>IL1RN</i> | Subcutaneous adipose      | ILMN_1689734 | +          | 3.9x10 <sup>-6</sup> | 0              | 0.47            | +                 | 2.3x10 <sup>-5</sup> | 0              | 0.62            |
|              |                           | ILMN_1774874 | +          | 1.1x10 <sup>-5</sup> | 0              | 0.72            | +                 | 2.3x10 <sup>-6</sup> | 0              | 0.63            |
|              | Lymphoblastoid cell lines | ILMN_1689734 | NA         | 0.07                 | 0              | 0.78            | NA                | 0.15                 | 0              | 0.71            |
|              |                           | ILMN_1774874 | +          | 1.7x10 <sup>-4</sup> | 0              | 0.76            | +                 | 2.2x10 <sup>-6</sup> | 0              | 0.57            |
|              | Skin                      | ILMN_1689734 | NA         | 0.91                 | 0              | 0.52            | NA                | 0.16                 | 0              | 0.69            |
|              |                           | ILMN_1774874 | NA         | 0.60                 | 80             | 0.02            | NA                | 0.76                 | 44             | 0.18            |
| <i>IL36B</i> | Subcutaneous adipose      | ILMN_1799519 | NA         | 0.44                 | 0              | 0.49            | NA                | 0.23                 | 0              | 0.51            |
|              | Lymphoblastoid cell lines | ILMN_1799519 | NA         | 0.42                 | 0              | 0.63            | NA                | 0.62                 | 0              | 0.74            |
|              | Skin                      | ILMN_1799519 | +          | 3.3x10 <sup>-6</sup> | 82             | 0.019           | +                 | 1.3x10 <sup>-5</sup> | 74             | 0.047           |

\* Direction relates to change in mRNA expression with increasing number of IL-1Ra increasing alleles. Regional association plots are provided in **S-Figures 2 & 3**.

**S-Table 2: Summary information on biomarkers and cardiovascular risk factors for all five studies with participant level data**

| Variable                        | Category | CGPS |               | CCHS |               | EPIC-CVD |               | BRAVE |               | PROMIS* |               | PROMIS+ |               |
|---------------------------------|----------|------|---------------|------|---------------|----------|---------------|-------|---------------|---------|---------------|---------|---------------|
|                                 |          | n    | Mean (SD) / % | n    | Mean (SD) / % | n        | Mean (SD) / % | n     | Mean (SD) / % | n       | Mean (SD) / % | n       | Mean (SD) / % |
| IL1Ra score                     | 0        | 293  | 10.5          | 692  | 11.5          | 2015     | 12.0          | 132   | 8.0           | 692     | 12.7          | 437     | 10.9          |
|                                 | 1        | 884  | 31.5          | 1959 | 32.4          | 5536     | 32.9          | 568   | 34.5          | 2085    | 38.4          | 1611    | 40.1          |
|                                 | 2        | 1019 | 36.4          | 2177 | 36.1          | 5925     | 35.2          | 822   | 50.0          | 2258    | 41.6          | 1661    | 41.3          |
|                                 | 3        | 522  | 18.6          | 1046 | 17.3          | 2813     | 16.7          | 117   | 7.1           | 362     | 6.7           | 294     | 7.3           |
|                                 | 4        | 85   | 3.0           | 163  | 2.7           | 549      | 3.3           | 5     | 0.3           | 31      | 0.6           | 19      | 0.5           |
| rs6743376                       | AA       | 1139 | 40.6          | 2586 | 42.8          | 7578     | 45.0          | 924   | 56.2          | 3490    | 64.3          | 2555    | 63.5          |
|                                 | AC       | 1300 | 46.4          | 2727 | 45.2          | 7306     | 43.4          | 610   | 37.1          | 1693    | 31.2          | 1286    | 32.0          |
|                                 | CC       | 364  | 13.0          | 724  | 12.0          | 1954     | 11.6          | 110   | 6.7           | 245     | 4.5           | 181     | 4.5           |
| rs1542176                       | TT       | 694  | 24.8          | 1571 | 26.0          | 4276     | 25.4          | 359   | 21.8          | 1321    | 24.3          | 898     | 22.3          |
|                                 | TC       | 1418 | 50.6          | 3004 | 49.8          | 8317     | 49.4          | 817   | 49.7          | 2586    | 47.6          | 2005    | 49.9          |
|                                 | CC       | 691  | 24.7          | 1462 | 24.2          | 4245     | 25.2          | 468   | 28.5          | 1521    | 28.0          | 1119    | 27.8          |
| Age at survey (yrs)             |          | 2803 | 58.0(12.6)    | 6037 | 63.3(14.7)    | 16838    | 56.6(10.1)    | 1644  | 50.1(10.0)    | 5428    | 54.5(9.2)     | 4022    | 55.1(7.6)     |
| Gender                          | Male     | 1230 | 43.9          | 2438 | 40.4          | 8403     | 49.9          | 1455  | 88.5          | 4424    | 81.5          | 3228    | 80.3          |
| SBP (mmHg)                      |          |      |               |      |               | 13353    | 137.6(20.6)   | 1644  | 118.7(17.5)   | 5272    | 128.0(17.9)   | 4002    | 128.4(16.3)   |
| DBP (mmHg)                      |          |      |               |      |               | 13353    | 83.6(11.1)    | 1644  | 77.1(9.8)     | 5272    | 80.9(9.9)     | 3999    | 81.4(9.0)     |
| Height (m)                      |          | 2800 | 1.7(0.1)      | 3962 | 1.7(0.1)      | 16402    | 1.7(0.1)      | 1644  | 1.6(0.1)      | 5363    | 1.7(0.1)      | 4001    | 1.7(0.1)      |
| BMI (kg/m2)                     |          | 2796 | 26.1(4.1)     | 3962 | 26.0(4.3)     | 16358    | 26.9(4.4)     | 1644  | 22.7(7.0)     | 5327    | 25.6(4.6)     | 3977    | 26.6(5.6)     |
| Waist (cm)                      |          |      |               |      |               | 14253    | 90.2(12.9)    |       |               | 5318    | 91.9(11.9)    | 3977    | 93.9(12.7)    |
| Waist/hip ratio                 |          |      |               |      |               | 14225    | 0.9(0.1)      | 1644  | 1.0(0.1)      | 5332    | 0.9(0.1)      | 4005    | 1.0(0.1)      |
| Total cholesterol (mmol/l)      |          | 2730 | 5.6(1.0)      | 3896 | 5.6(1.1)      | 14103    | 6.2(1.2)      | 1638  | 4.6(1.0)      | 5214    | 4.6(1.4)      | 3942    | 4.8(1.3)      |
| HDL cholesterol (mmol/L)        |          | 2730 | 1.5(0.5)      | 3890 | 1.5(0.5)      | 14099    | 1.4(0.4)      | 1638  | 0.9(0.2)      | 5203    | 0.9(0.3)      | 3939    | 0.9(0.3)      |
| Non-HDL cholesterol (mmol/L)    |          | 2730 | 4.1(1.0)      | 3890 | 4.1(1.1)      | 14098    | 4.8(1.2)      | 1638  | 3.7(1.0)      | 5203    | 3.7(1.3)      | 3939    | 3.9(1.3)      |
| ln(Triglycerides [mmol/L])      |          | 2730 | 0.3(0.5)      | 3896 | 0.3(0.5)      | 14098    | 0.3(0.6)      | 1638  | 0.7(0.5)      | 5213    | 0.7(0.5)      | 3937    | 0.8(0.5)      |
| Apolipoprotein A1 (g/l)         |          | 2730 | 1.7(0.3)      | 3893 | 1.5(0.3)      | 14147    | 1.5(0.3)      |       |               |         |               |         |               |
| Apolipoprotein B (g/l)          |          | 2730 | 1.1(0.3)      | 3887 | 1.1(0.3)      | 14135    | 1.1(0.3)      |       |               |         |               |         |               |
| ln(Lp(a)[mg/dL])                |          |      |               | 3837 | 3.0(1.0)      | 13605    | 0.4(0.9)      |       |               |         |               |         |               |
| ln(CRP [mg/l])                  |          | 2727 | 0.6(0.6)      | 3806 | 0.5(1.1)      | 14100    | 0.4(1.1)      |       |               |         |               |         |               |
| ln(Leukocyte count [1e9/L])     |          | 2733 | 1.9(0.2)      | 3906 | 1.9(0.3)      |          |               |       |               |         |               |         |               |
| ln(Eosinophil count [1e9/L])    |          | 2730 | -1.9(0.6)     | 3881 | -1.7(0.6)     |          |               |       |               |         |               |         |               |
| ln(Basophil count [1e9/L])      |          | 2704 | -3.6(0.5)     | 2867 | -2.8(0.4)     |          |               |       |               |         |               |         |               |
| ln(Lymphocyte count [1e9/L])    |          | 2733 | 0.7(0.3)      | 3904 | 0.6(0.3)      |          |               |       |               |         |               |         |               |
| ln(Neutrophil count [1e9/L])    |          | 2722 | 1.4(0.3)      | 3903 | 1.3(0.4)      |          |               |       |               |         |               |         |               |
| Monocyte count (1e9/L)          |          | 2733 | 0.4(0.1)      | 3904 | 0.4(0.1)      |          |               |       |               |         |               |         |               |
| Fibrinogen (mmol/L)             |          | 2725 | 10.3(2.0)     | 3918 | 11.7(3.1)     |          |               |       |               |         |               |         |               |
| Albumin (g/l)                   |          |      |               |      |               | 13726    | 46.2(2.9)     |       |               |         |               |         |               |
| ln(Creatinine [mg/dL])          |          |      |               |      |               | 13774    | -0.2(0.2)     |       |               |         |               |         |               |
| Glucose (mmol/l)                |          | 2730 | 5.4(1.2)      | 3896 | 5.9(1.9)      | 13071    | 5.1(2.4)      |       |               | 5182    | 7.3(4.2)      | 3920    | 7.0(4.1)      |
| HbA1c (%)                       |          |      |               |      |               | 14643    | 5.8(0.9)      |       |               | 2626    | 6.5(1.7)      | 3470    | 6.8(1.9)      |
| ln(Alkaline Phosphatase [iu/l]) |          |      |               |      |               | 13099    | 4.2(0.3)      |       |               |         |               |         |               |

|                                                                                |       |             |
|--------------------------------------------------------------------------------|-------|-------------|
| ln(Alanine Transaminase [iu/l])                                                | 14069 | 3.0(0.5)    |
| ln(Aspartate Aminotransferase [iu/l])                                          | 13778 | 3.3(0.3)    |
| Calcium (mmol/l)                                                               | 13081 | 2.5(0.1)    |
| ln(Ferritin [pmol/l])                                                          | 13751 | 5.3(1.0)    |
| ln(Gamma-Glutamyl Transferase [iu/l])                                          | 14098 | 3.2(0.6)    |
| Iron (μmol/l)                                                                  | 13112 | 17.2(6.0)   |
| Magnesium (mmol/l)                                                             | 13126 | 0.9(0.1)    |
| ln(Total bilirubin [μmol/l])                                                   | 13608 | 1.9(0.5)    |
| Transferrin (μmol/l)                                                           | 13071 | 69.3(10.4)  |
| Uric acid (μmol/l)                                                             | 13821 | 306.1(83.9) |
| estimated glomerular filtration rate (eGFR) (ml/min/1.73m <sup>2</sup> ), MDRD | 13774 | 93.7(21.5)  |

CIHDS = Copenhagen Ischaemic Heart Disease Study, CGPS = Copenhagen General Population Study, CCHS = Copenhagen City Heart Study, EPIC-CVD = European Prospective Investigation into Cancer and Nutrition Study, BRAVE = Bangladesh Risk of Acute Vascular Events Study, PROMIS = Pakistan Risk of Myocardial Infarction Study, HWE = Hardy-Weinberg Equilibrium (in controls), \* Subset of PROMIS genotyped using a customised version of the CardioMetabo array, + Subset of PROMIS genotyped using a customised version of the OmniExpress array.

**S-Table 3: Summary information on CHD cases and controls for all five studies with participant level data**

| Variable    | Category | CIHDS/CGPS |               |          |               |          | CCHS  |               |          |               |          | EPIC  |               |          |               |          |
|-------------|----------|------------|---------------|----------|---------------|----------|-------|---------------|----------|---------------|----------|-------|---------------|----------|---------------|----------|
|             |          | Cases      |               | Controls |               | P<br>HWE | Cases |               | Controls |               | P<br>HWE | Cases |               | Controls |               | P<br>HWE |
|             |          | n          | Mean (SD) / % | n        | Mean (SD) / % |          | n     | Mean (SD) / % | n        | Mean (SD) / % |          | n     | Mean (SD) / % | n        | Mean (SD) / % |          |
| Total       |          | 2703       |               | 2803     |               |          | 1999  |               | 6559     |               |          | 9587  |               | 7251     |               |          |
| IL1Ra score | 0        | 266        | 9.8           | 293      | 10.5          |          | 221   | 11.1          | 748      | 11.4          |          | 1097  | 11.4          | 918      | 12.7          |          |
|             | 1        | 890        | 32.9          | 884      | 31.5          |          | 648   | 32.4          | 2154     | 32.8          |          | 3080  | 32.1          | 2456     | 33.9          |          |
|             | 2        | 965        | 35.7          | 1019     | 36.4          |          | 701   | 35.1          | 2359     | 36.0          |          | 3399  | 35.5          | 2526     | 34.8          |          |
|             | 3        | 489        | 18.1          | 522      | 18.6          |          | 367   | 18.4          | 1096     | 16.7          |          | 1681  | 17.5          | 1132     | 15.6          |          |
|             | 4        | 93         | 3.4           | 85       | 3.0           |          | 62    | 3.1           | 202      | 3.1           |          | 330   | 3.4           | 219      | 3.0           |          |
| rs6743376   | AA       | 1119       | 41.4          | 1139     | 40.6          | 0.84     | 833   | 41.7          | 2788     | 42.5          | 0.35     | 4155  | 43.3          | 3423     | 47.2          | 0.09     |
|             | AC       | 1223       | 45.2          | 1300     | 46.4          |          | 906   | 45.3          | 2978     | 45.4          |          | 4233  | 44.2          | 3073     | 42.4          |          |
|             | CC       | 361        | 13.4          | 364      | 13.0          |          | 260   | 13.0          | 793      | 12.1          |          | 1199  | 12.5          | 755      | 10.4          |          |
| rs1542176   | TT       | 644        | 23.8          | 694      | 24.8          | 0.55     | 506   | 25.3          | 1731     | 26.4          | 0.54     | 2411  | 25.1          | 1865     | 25.7          | 0.24     |
|             | TC       | 1404       | 51.9          | 1418     | 50.6          |          | 1013  | 50.7          | 3252     | 49.6          |          | 4742  | 49.5          | 3575     | 49.3          |          |
|             | CC       | 655        | 24.2          | 691      | 24.7          |          | 480   | 24.0          | 1576     | 24.0          |          | 2434  | 25.4          | 1811     | 25.0          |          |
| Age (years) |          | 2703       | 60.4(11.9)    | 2803     | 58.0(12.6)    |          | 1999  | 66.1(10.8)    | 6559     | 55.4(15.4)    |          | 9587  | 59.7(8.9)     | 7251     | 52.5(10.2)    |          |
| Gender      | Male     | 1979       | 73.2          | 1230     | 43.9          |          | 1045  | 52.3          | 2756     | 42.0          |          | 5686  | 59.3          | 2717     | 37.5          |          |

CIHDS = Copenhagen Ischaemic Heart Disease Study, CGPS = Copenhagen General Population Study, CCHS = Copenhagen City Heart Study, EPIC = European Prospective Investigation into Cancer and Nutrition Study, BRAVE = Bangladesh Risk of Acute Vascular Events Study, PROMIS = Pakistan Risk of Myocardial Infarction Study, HWE = Hardy-Weinberg Equilibrium



**S-Table 3 (continued): Summary information on CHD cases and controls for all five studies with participant level data**

| Variable    | Category | BRAVE |               |          |               |          | PROMIS* |               |          |               |          | PROMIS+ |               |          |               |          |
|-------------|----------|-------|---------------|----------|---------------|----------|---------|---------------|----------|---------------|----------|---------|---------------|----------|---------------|----------|
|             |          | Cases |               | Controls |               | P<br>HWE | Cases   |               | Controls |               | P<br>HWE | Cases   |               | Controls |               | P<br>HWE |
|             |          | n     | Mean (SD) / % | n        | Mean (SD) / % |          | n       | Mean (SD) / % | n        | Mean (SD) / % |          | n       | Mean (SD) / % | n        | Mean (SD) / % |          |
| Total       |          | 1820  |               | 1495     |               |          | 2102    |               | 1903     |               |          | 3736    |               | 3483     |               |          |
| IL1Ra score | 0        | 121   | 6.6           | 119      | 8.0           |          | 269     | 12.8          | 245      | 12.9          |          | 446     | 11.9          | 373      | 10.7          |          |
|             | 1        | 630   | 34.6          | 518      | 34.6          |          | 799     | 38.0          | 729      | 38.3          |          | 1451    | 38.8          | 1414     | 40.6          |          |
|             | 2        | 917   | 50.4          | 750      | 50.2          |          | 867     | 41.2          | 786      | 41.3          |          | 1545    | 41.4          | 1436     | 41.2          |          |
|             | 3        | 150   | 8.2           | 103      | 6.9           |          | 158     | 7.5           | 134      | 7.0           |          | 277     | 7.4           | 246      | 7.1           |          |
|             | 4        | 2     | 0.1           | 5        | 0.3           |          | 9       | 0.4           | 9        | 0.5           |          | 17      | 0.5           | 14       | 0.4           |          |
| rs6743376   | AA       | 981   | 53.9          | 851      | 56.9          | 0.19     | 1329    | 63.2          | 1220     | 64.1          | 1.00     | 2355    | 63.0          | 2225     | 63.9          | 0.23     |
|             | AC       | 733   | 40.3          | 541      | 36.2          |          | 667     | 31.7          | 608      | 31.9          |          | 1225    | 32.8          | 1103     | 31.7          |          |
|             | CC       | 106   | 5.8           | 103      | 6.9           |          | 106     | 5.0           | 75       | 3.9           |          | 156     | 4.2           | 155      | 4.5           |          |
| rs1542176   | TT       | 384   | 21.1          | 323      | 21.6          | 1.00     | 508     | 24.2          | 462      | 24.3          | 0.02     | 897     | 24.0          | 785      | 22.5          | 0.81     |
|             | TC       | 895   | 49.2          | 744      | 49.8          |          | 1024    | 48.7          | 901      | 47.3          |          | 1775    | 47.5          | 1729     | 49.6          |          |
|             | CC       | 541   | 29.7          | 428      | 28.6          |          | 570     | 27.1          | 540      | 28.4          |          | 1064    | 28.5          | 969      | 27.8          |          |
| Age (years) |          | 1820  | 51.9(10.6)    | 1495     | 50.2(10.1)    |          | 2102    | 53.7(10.0)    | 1903     | 56.2(8.1)     |          | 3736    | 53.8(10.2)    | 3483     | 55.6(7.3)     |          |
| Gender      | Male     | 1609  | 88.4          | 1331     | 89.0          |          | 1774    | 84.4          | 1588     | 83.4          |          | 3140    | 84.0          | 2825     | 81.1          |          |

CIHDS = Copenhagen Ischaemic Heart Disease Study, CGPS = Copenhagen General Population Study, CCHS = Copenhagen City Heart Study, EPIC-CVD = European Prospective Investigation into Cancer and Nutrition Study, BRAVE = Bangladesh Risk of Acute Vascular Events Study, PROMIS = Pakistan Risk of Myocardial Infarction Study, HWE = Hardy-Weinberg Equilibrium (in controls), \* Subset of PROMIS genotyped using a customised version of the CardioMetabo array, + Subset of PROMIS genotyped using a customised version of the OmniExpress array.

**S-Table 4: Genetic quality control for contributing studies with participant level data**

|                                                   | CIHDS/CGPS |      | CCHS                       |      | EPIC  |      | BRAVE |      | PROMIS* |      | PROMIS+ |      |
|---------------------------------------------------|------------|------|----------------------------|------|-------|------|-------|------|---------|------|---------|------|
|                                                   | n          | %    | n                          | %    | n     | %    | n     | %    | n       | %    | n       | %    |
| <b>Total pre-QC</b>                               | 6000       | 100  | 8908                       | 100  | 18733 | 100  | 3649  | 100  | 12044   | 100  | 8842    | 100  |
| <b>Removed due to</b>                             |            |      |                            |      |       |      |       |      |         |      |         |      |
| <i>Heterozygosity</i>                             | 65         | 1.1  | 53                         | 0.6  | 103   | 0.5  | 35    | 1.0  | 90      | 0.7  | 0       | 0.0  |
| <i>Sample call rate &lt;0.97</i>                  | 134        | 2.2  | 36                         | 0.4  | 260   | 1.4  | 22    | 0.6  | 220     | 1.8  | 119     | 1.3  |
| <i>Gender mismatches</i>                          | 27         | 0.5  | 33                         | 0.4  | 7     | 0.0  | 6     | 0.2  | 75      | 0.6  | 78      | 0.9  |
| <i>Cryptic relatedness</i>                        | 221        | 3.7  | 212                        | 2.4  | 765   | 4.1  | 111   | 3.0  | 264     | 2.2  | 195     | 2.2  |
| <i>Duplicates between<br/>CIHDS/CGPS and CCHS</i> | 33         | 0.6  | removed from<br>CIHDS/CGPS |      |       |      |       |      |         |      |         |      |
| <i>Population outliers</i>                        | 14         | 0.2  | 13                         | 0.1  | 9     | 0.0  | 9     | 0.2  | 2       | 0.02 | 0       | 0.0  |
| <b>Remaining</b>                                  | 5506       | 91.8 | 8561                       | 96.1 | 17589 | 93.9 | 3466  | 95.0 | 11393   | 94.6 | 8450    | 95.6 |

Discrepancies in the total number of individuals passing genetic quality control (below) and the number of individuals contributing to analyses (Stables 1 & 2) are due to missing information on covariates age, sex and *IL1RN* SNPs (rs6743376, rs1542176) and/or due to removal of participants from PROMIS due to overlap with the C4D consortium. \* Subset of PROMIS genotyped using a customised version of the CardioMetabo array, + Subset of PROMIS genotyped using a customised version of the OmniExpress array.

**S-Table 5: Principal endpoint definitions**

| Disease/Trait                | Consortium                                | Reference(s)<br>(PMID)                                   | Endpoint definition / diagnosis*                                                                                                                                                                                                                                                                                                                                                                                                                                                                                                                                                                                                                                                                                                                                                                                                      |
|------------------------------|-------------------------------------------|----------------------------------------------------------|---------------------------------------------------------------------------------------------------------------------------------------------------------------------------------------------------------------------------------------------------------------------------------------------------------------------------------------------------------------------------------------------------------------------------------------------------------------------------------------------------------------------------------------------------------------------------------------------------------------------------------------------------------------------------------------------------------------------------------------------------------------------------------------------------------------------------------------|
| Rheumatoid Arthritis         | Okada                                     | 24390342                                                 | All cases met 1987 criteria of the American College of Rheumatology for RA diagnosis (3358796)                                                                                                                                                                                                                                                                                                                                                                                                                                                                                                                                                                                                                                                                                                                                        |
| Type 2 diabetes              | DIAGRAM & EPIC-<br>InterAct               | 22885922<br>21717116                                     | Case definition and characteristics of the DIAGRAM consortium included eg. American Diabetes Association (ADA) or WHO criteria, and have been described in detail previously (20581827). In the InterAct study, ascertainment of incident type 2 diabetes involved a review of the existing EPIC datasets at each centre using multiple sources of evidence including self-report, linkage to primary-care registers, secondary-care registers, medication use (drug registers), hospital admissions and mortality data. Information from any follow-up visit or external evidence with a date later than the baseline visit was used. further evidence for all cases with information on incident type 2 diabetes was sought from two independent sources at a minimum, including individual medical records review in some centres. |
| Coronary heart<br>disease    | CARDIoGRAM                                | 21378990                                                 | See S-Table 9 for study-specific definitions.                                                                                                                                                                                                                                                                                                                                                                                                                                                                                                                                                                                                                                                                                                                                                                                         |
|                              | C4D                                       | 21378988                                                 | See S-Table 9 for study-specific definitions.                                                                                                                                                                                                                                                                                                                                                                                                                                                                                                                                                                                                                                                                                                                                                                                         |
|                              | Studies with<br>participant level<br>data | Unpublished                                              | See S-Table 9 for study-specific definitions.                                                                                                                                                                                                                                                                                                                                                                                                                                                                                                                                                                                                                                                                                                                                                                                         |
| Ischaemic stroke             | Metastroke                                | 23041239                                                 | Stroke was defined as a typical clinical syndrome with radiological confirmation. Stroke subtyping was done with the Trial of Org 10172 in Acute Stroke Treatment (TOAST) classification system. Where subtyping was done, brain CT or MRI was undertaken for more than 95% of cases in all the discovery cohorts.                                                                                                                                                                                                                                                                                                                                                                                                                                                                                                                    |
| Abdominal aortic<br>aneurysm | AAA genetics<br>consortium                | 22055160<br>20622881<br>23535823<br>15096456<br>23743551 | Abdominal aortic aneurysm ascertainment (infrarenal aortic diameter of >30 mm) was by either ultrasonography or by cross-sectional imaging except for patients who presented with acute rupture and for whom it was assumed that the AAA was >5.5 cm.                                                                                                                                                                                                                                                                                                                                                                                                                                                                                                                                                                                 |

\* The descriptions used for criteria to define disease outcomes have, unless stated otherwise, been derived from those published by the relevant GWAS consortium. Numbers in parentheses indicate PubMed identifiers (PMID) of relevant publications.

**S-Table 6: Exploratory endpoint definitions**

| Disease/Trait                           | Consortium                           | Reference(s)<br>(PMID) | Endpoint definition / diagnosis*                                                                                                                                                                                                                                                                                                                                                                                                                                                                                                                                                                                                                                                                                                                               |
|-----------------------------------------|--------------------------------------|------------------------|----------------------------------------------------------------------------------------------------------------------------------------------------------------------------------------------------------------------------------------------------------------------------------------------------------------------------------------------------------------------------------------------------------------------------------------------------------------------------------------------------------------------------------------------------------------------------------------------------------------------------------------------------------------------------------------------------------------------------------------------------------------|
| Alzheimer's disease                     | IGAP                                 | 24162737               | Definitions vary between cohorts and include, for example autopsy-confirmed ( $\geq 60$ y at death), clinically-confirmed (DSM-IV criteria or Clinical Dementia Rating (CDR) $\geq 1$ ); MRI confirmed diagnosis; the NINCDS-ADRDA criteria for definite or probable Alzheimer's.                                                                                                                                                                                                                                                                                                                                                                                                                                                                              |
| Amyotrophic lateral sclerosis           | ALSGEN                               | 22959728               | All cases met the El Escorial criteria for probable or definite amyotrophic lateral sclerosis.                                                                                                                                                                                                                                                                                                                                                                                                                                                                                                                                                                                                                                                                 |
| Ankylosing spondylitis                  | WTCCC2 & TASC                        | 21743469               | Modified New York criteria for ankylosing spondylitis (6231933)                                                                                                                                                                                                                                                                                                                                                                                                                                                                                                                                                                                                                                                                                                |
| Asthma                                  | GABRIEL & AAGC                       | 21907864               | Clinical diagnosis or epidemiological questionnaire ascertained diagnosis of asthma                                                                                                                                                                                                                                                                                                                                                                                                                                                                                                                                                                                                                                                                            |
| Atopic dermatitis                       |                                      |                        | Atopic dermatitis was diagnosed on the basis of a skin examination performed by experienced dermatologists and pediatricians according to standard criteria, which included the presence of chronic or chronically relapsing pruritic dermatitis with the typical morphology and distribution (7918015).                                                                                                                                                                                                                                                                                                                                                                                                                                                       |
| Atrial fibrillation                     | CHARGE                               | 22544366               | Definitions predominantly based on electrocardiographically confirmed atrial fibrillation, with slight variations between cohorts.                                                                                                                                                                                                                                                                                                                                                                                                                                                                                                                                                                                                                             |
| Chronic kidney disease                  | CKD Gen                              | 20383146               | Chronic kidney disease was defined as eGFR <sub>crea</sub> $< 60$ ml/min/1.73 m <sup>2</sup> according to National Kidney Foundation guidelines (11904577).                                                                                                                                                                                                                                                                                                                                                                                                                                                                                                                                                                                                    |
| Heart Failure                           | CHARGE                               | 20445134               | Definitions varied between the four contributing studies: ARIC relied on ICD-9 codes collected from hospital discharge summaries and death certificates. For the remaining three studies (Cardiovascular Health Study [CHS], Framingham Heart Study [FHS], and Rotterdam study [RS]), heart failure events identified by self-report or administrative data were validated by physician's review of medical records. CHS and FHS applied their published criteria, and RS applied the European Society of Cardiology criteria.                                                                                                                                                                                                                                 |
| Inflammatory bowel disease              | IIBDGC                               | 23128233               | Ulcerative colitis and Crohn's disease                                                                                                                                                                                                                                                                                                                                                                                                                                                                                                                                                                                                                                                                                                                         |
| Juvenile idiopathic arthritis           |                                      | unpublished            | Patients with the two most common subtypes of International League of Associations for Rheumatology (ILAR)-defined juvenile idiopathic arthritis, rheumatoid factor-negative polyarticular and oligoarticular juvenile idiopathic arthritis (both persistent and extended).                                                                                                                                                                                                                                                                                                                                                                                                                                                                                    |
| Multiple Sclerosis                      | IMSGC & WTCCC2                       | 21833088               | Diagnosis depends on meeting established and well-validated criteria that combine clinical and para-clinical laboratory-based information, introduced in 1983 and revised and updated between 2001 and 2005 (6847134; 11456302; 16283615). The principle of these criteria is to establish that focal areas consistent with inflammatory demyelination have occurred in more than one part of the brain and spinal cord and on more than one occasion, and for which there is no better explanation than the diagnosis of multiple sclerosis. In the majority of centres disease severity has been documented using the Expanded Disability Status Score (EDSS) (6685237) and its dependent derivative the Multiple Sclerosis Severity Score (MSSS).(15824338) |
| Osteoarthritis                          | arcOGEN                              | 22763110               | Primary osteoarthritis of the hip or knee of radiographic Kellgren-Lawrence grade $\geq 2$ , or clinical evidence of disease to a level requiring total joint replacement. The exclusion criteria included the need for joint replacement due to fracture, secondary osteoarthritis of any cause, and developmental, vascular, or infective causes of joint disease.                                                                                                                                                                                                                                                                                                                                                                                           |
| Parkinson's disease                     | IPDGC                                | 21292315               | Diagnosis criteria vary between cohorts and include for example, UK Brain Bank criteria (1564476).                                                                                                                                                                                                                                                                                                                                                                                                                                                                                                                                                                                                                                                             |
| Schizophrenia                           | PGC                                  | 23974872               | Case inclusion criteria included $\geq 2$ hospitalizations with a discharge diagnosis of schizophrenia, based on ICD coding.( ICD-8 295, ICD-9 295, and ICD-10 F20 ). The ICD-8 and ICD-9 diagnosis of latent schizophrenia (295.5 and 295F) was excluded.                                                                                                                                                                                                                                                                                                                                                                                                                                                                                                     |
| Type 1 diabetes                         |                                      | 21980299               | Patients were included if they had type-1 diabetes diagnosed by a physician and were taking insulin continuously since diagnosis.                                                                                                                                                                                                                                                                                                                                                                                                                                                                                                                                                                                                                              |
| Breast cancer                           | Breast Cancer Association Consortium | 23535729               | Clinical diagnosis, identified by hospitals or through cancer registries                                                                                                                                                                                                                                                                                                                                                                                                                                                                                                                                                                                                                                                                                       |
| Childhood acute lymphoblastoid lymphoma |                                      | 19684604;<br>23996088  | Clinical diagnosis                                                                                                                                                                                                                                                                                                                                                                                                                                                                                                                                                                                                                                                                                                                                             |
| Chronic lymphocytic                     |                                      | 24292274               | Clinical diagnosis in accordance with WHO guidelines                                                                                                                                                                                                                                                                                                                                                                                                                                                                                                                                                                                                                                                                                                           |

|                      |         |             |                                                                                                                                                                                                                                                                              |
|----------------------|---------|-------------|------------------------------------------------------------------------------------------------------------------------------------------------------------------------------------------------------------------------------------------------------------------------------|
| leukemia             |         |             |                                                                                                                                                                                                                                                                              |
| Colorectal cancer    | COGENT  | 24737748    | Cases were defined according to the ninth revision of the International Classification of Diseases (ICD) by codes 153–154.                                                                                                                                                   |
| Lung cancer          |         | 24880342    | Non-small cell lung cancer (NSCLC), classified as adenocarcinoma, squamous cell carcinoma, large-cell carcinoma, mixed adenosquamous carcinoma and other NSCLC histologies following either the International Classification of Diseases for Oncology (ICD-O) or WHO coding. |
| Melanoma             | GenoMEL | unpublished | Clinical diagnosis, identified by hospitals or through cancer registries                                                                                                                                                                                                     |
| Multiple myeloma     |         | 23955597    | Cases were defined according to the 10 <sup>th</sup> revision of the ICD by code C90.0.                                                                                                                                                                                      |
| Renal cell carcinoma |         | 23184150    | Histologically proven renal cell carcinoma                                                                                                                                                                                                                                   |
| Tuberculosis         |         | unpublished | Pulmonary tuberculosis in HIV-negative adults (clinical diagnosis confirmed by culture of <i>M. tuberculosis</i> ).                                                                                                                                                          |

\* The descriptions used for criteria to define disease outcomes have, unless stated otherwise, been derived from those published by the relevant GWAS consortium. Numbers in parentheses indicate PubMed identifiers (PMID) of relevant publications.

**S-Table 7: Analytical details of consortia & studies contributing summary level data for principal pre-specified outcomes**

| Disease/Trait             | Consortium                  | Reference(s) (PMID)                                      | QC steps (cut-offs)                                                                                                                                                                             | Analysis details                                                                                                                                                                                                                                 | Studies | Cases                    | Controls             |
|---------------------------|-----------------------------|----------------------------------------------------------|-------------------------------------------------------------------------------------------------------------------------------------------------------------------------------------------------|--------------------------------------------------------------------------------------------------------------------------------------------------------------------------------------------------------------------------------------------------|---------|--------------------------|----------------------|
| Rheumatoid Arthritis      | Okada                       | 24390342                                                 | Exclusion of closely related subjects and ancestry outliers, sample call rate (<0.95), MAF (<5%), Hardy-Weinberg-Equilibrium (P<10 <sup>-7</sup> ), Info score (<0.5)                           | Imputation to 1KG, logistic regression model adjusting for ancestry-informative principal components, fixed-effects, inverse variance-weighted meta-analysis                                                                                     | 18      | 14361                    | 43923                |
| Type 2 diabetes           | InterAct                    | 21717116                                                 | Sample call rate (98%), SNP call rate (95%), removal of ethnic outliers by comparison to hapmap CEU, heterozygosity.                                                                            | Imputation to 1KG, logistic regression model adjusting for ancestry-informative principal components, age, sex and centre of recruitment                                                                                                         | 1       | 6813                     | 8540                 |
|                           | DiaGRAM                     | 20581827<br>22885922                                     | Individual study QC, SNPs with MAF<1%                                                                                                                                                           | Imputed using CEU Hapmap PhII samples                                                                                                                                                                                                            | 12      | 11902                    | 53152                |
| Coronary heart disease    | CARDIoGRAM                  | 21378990                                                 | Sample call rate (<0.95), cryptic related individuals (some studies), homozygosity (some studies), Hardy-Weinberg Equilibrium in controls (10 <sup>-6</sup> ), MAF (<1%), SNP call rate (<0.95) | Imputation, logistic regression adjusting for age and sex, fixed effects inverse variance weighted meta-analysis                                                                                                                                 | 14      | 16772                    | 39919                |
|                           | C4D                         | 21378988                                                 | Sample call rate (<0.95), removal of cryptically related individuals, Exclusion of ethnic outliers by comparison with hapmap reference populations, SNP call rate (<0.975), MAF (<1%)           | Logistic regression models using robust sandwich estimators of variance, adjusting for country of origin or ancestry-informative principal components to account for population structure, fixed effects inverse-variance weighted meta-analysis | 4       | 15420                    | 15062                |
| Ischaemic stroke          | METASTROKE                  | 23041239                                                 | Removal of ancestry outliers using principal components, removal of low-quality DNA samples, MAF (<1%), SNP call rate (<0.95), Hardy-Weinberg equilibrium (~P<10 <sup>-6</sup> )                | Imputation to HapMap II, III or 1KG, logistic regression of cox-proportional hazards accounting for ancestry-informative principal components, fixed effects inverse-variance weighted meta-analysis                                             | 15      | 12389                    | 62004                |
| Abdominal aortic aneurysm | AAA genetics consortium     | 22055160<br>20622881<br>23535823<br>15096456<br>23743551 | Sample call rate (<0.95); MAF (<1%), SNP call rate (<0.975), Hardy-Weinberg equilibrium (<P<10 <sup>-6</sup> ), Imputation score <0.9                                                           | Imputation to 1000G in individual datasets, analysis by logistic regression (additive model), meta-analysis using generic inverse variance method followed by further genomic control step                                                       | 6       | 4682                     | 38739                |
| CRP, IL-6, IL-1Ra         | Cardiovascular Health study | 24182552                                                 | SNP call rate (<0.95); , Hardy-Weinberg equilibrium (<P<10 <sup>-5</sup> )                                                                                                                      | Imputation to CEU HapMap PhII and III samples, logistic regression model adjusting for ancestry-informative principal components, age, sex                                                                                                       | 1       | IL-1Ra:<br>IL-6:<br>CRP: | 3081<br>2917<br>3181 |
| CRP, IL-6                 | SARDINia study              | 22291609                                                 | SNP call rate (<0.95), MAF (<1%) Hardy-Weinberg equilibrium (<P<10 <sup>-6</sup> )                                                                                                              | Additive effects model using a family-based association test implemented in Merlin (accounting for relatedness structure)                                                                                                                        | 1       | IL-6:<br>CRP:            | 5924<br>5716         |
| CRP, IL-6                 | UK10K consortium            | Unpublished                                              | Sample call rate (<0.95), homozygosity >3SD, exclusion of cryptically related individuals, MAF<0.1% or INFO score <0.4.                                                                         | Imputation to 1kG and UK10K combined panel, each cohort excluded outliers and applied inverse normal transformation followed by standardization, fixed effects inverse-variance weighted meta-analysis                                           | 13      | IL-6:<br>CRP:            | 7311<br>33911        |

PMID = PubMed identifiers of relevant publications.

**S-Table 8: Analytical details of consortia & studies contributing summary level data for exploratory outcomes**

| Disease/Trait                 | Consortium     | Reference(s) (PMID) | QC steps (cut-offs)                                                                                                                                                                                                                                                         | Analysis details                                                                                                                                                                                                                                                                                   | Studies | Cases | Controls |
|-------------------------------|----------------|---------------------|-----------------------------------------------------------------------------------------------------------------------------------------------------------------------------------------------------------------------------------------------------------------------------|----------------------------------------------------------------------------------------------------------------------------------------------------------------------------------------------------------------------------------------------------------------------------------------------------|---------|-------|----------|
| Alzheimer's disease           | IGAP           | 24162737            | Study specific cut-offs, Sample call rate, gender mismatches, heterozygosity, duplicates and related individuals, ancestry outliers, SNP call rate (<0.95); MAF (<1%)                                                                                                       | Imputation to 1KG (2010 interim release); logistic regression model for case-control collections, Cox proportional hazards model for prospective cohorts, either model adjusting for age, sex and ancestry informative principal components; fixed-effects inverse variance weighted meta analysis | 31      | 17008 | 37154    |
| Amyotrophic lateral sclerosis | ALSGEN         | 22959728            | Relatedness, gender ambiguities, heterozygosity outliers, samples call rates (<0.95), SNP call rate, differential SNP call rate between cases and controls, Hardy-Weinberg Equilibrium                                                                                      | Logistic regression model adjusting for ancestry informative principal components; fixed-effects, inverse variance-weighted meta-analysis                                                                                                                                                          | 13      | 4240  | 5104     |
| Ankylosing spondylitis        | WTCCC2 & TASC  | 21743469            | Bayesian clustering approach to exclude outlying individuals on the basis of call rate, heterozygosity, ancestry and average probe intensity. (pairwise IBD >5%), MAF (<0.1%), SNP call rate (<0.98); Hardy-Weinberg P value (<5 × 10 <sup>-20</sup> in cases or controls). | Imputation to HapMap2/3; logistic regression model adjusting for ancestry-informative principal components, fixed-effects, inverse variance-weighted meta-analysis                                                                                                                                 | 2       | 2000  | 5660     |
| Asthma                        | GABRIEL & AAGC | 21907864            | Removal of duplicates or cryptically related individuals, removal of ancestry outliers, SNP call rate (<0.95), Hardy-Weinberg P value (10 <sup>-6</sup> ), MAF (<1%)                                                                                                        | Imputation to 1KG and HapMap3 (2009 release), Cochran-Mantel-Haenszel test, inverse variance weighted fixed effects meta-analysis                                                                                                                                                                  | 39      | 12475 | 19967    |
| Atopic dermatitis             |                | Unpublished         | Sample call rate (<0.95), individuals with excess heterozygosity or homozygosity, duplicates or cryptically related individuals (>2 <sup>nd</sup> degree), SNP call rate (<0.95), Hardy-Weinberg Pvalue (<10 <sup>-8</sup> ), MAF (<5%)                                     | Imputation to 1KG (integrated variant set, release March 2012), Association analysis was carried out using logistic regression with allele dosage. Sex and the first 4 principal component scores were included in the models as covariates.                                                       | 1       | 2115  | 3831     |
| Atrial fibrillation           | CHARGE         | 22544366            | Study specific QC                                                                                                                                                                                                                                                           | Imputation to HapMap, logistic or cox regression models, adjusting for age, sex, and where appropriate ancestry-informative principal components, fixed-effects inverse variance weighted meta-analysis                                                                                            | 14      | 6707  | 52426    |
| Heart failure                 | CHARGE         | 20445134            | Study specific QC                                                                                                                                                                                                                                                           | Imputation to HapMap, Cox-proportional hazards model adjusting for age and sex, fixed-effects inverse variance weighted meta-analysis                                                                                                                                                              | 4       | 1835  | 11447    |
| Chronic kidney disease        | CKD Gen        | 20383146            | Study specific cut-offs for SNP call rate, Hardy-Weinberg P value, MAF                                                                                                                                                                                                      | Imputation to HapMap; logistic regression model adjusting for study site age and sex, fixed-effects inverse variance weighted meta-analysis                                                                                                                                                        | 20      | 5807  | 61286    |
| Inflammatory bowel disease    | IIBDGC         | 23128233            | Heterozygosity per individual (±0.2); SNP call rate (<0.98); difference in SNP call rate between cases and controls (>0.02); Hardy-Weinberg P value (controls <10 <sup>-6</sup> ; cases <10 <sup>-10</sup> )                                                                | Imputation to HapMap 3; logistic regression model adjusting for ancestry informative principal components;                                                                                                                                                                                         | 15      | 12882 | 21770    |

|                               |                                                   |             |                                                                                                                                                                                                                                                                                                                                                                                                   |                                                                                                                                                                                          |    |        |        |
|-------------------------------|---------------------------------------------------|-------------|---------------------------------------------------------------------------------------------------------------------------------------------------------------------------------------------------------------------------------------------------------------------------------------------------------------------------------------------------------------------------------------------------|------------------------------------------------------------------------------------------------------------------------------------------------------------------------------------------|----|--------|--------|
| Juvenile idiopathic arthritis | Consortium for Juvenile Arthritis Genetics (CJAG) | Unpublished | Relatedness, gender ambiguities, heterozygosity outliers, samples call rates (<0.95), SNP call rate, differential SNP call rate between cases and controls, Hardy–Weinberg Equilibrium.                                                                                                                                                                                                           | Imputation to 1K (IMPUTE2, June 2014 release). Logistic regression model adjusting for ancestry informative principal components; fixed effects, sample size weighted meta-analysis.     | 3  | 2750   | 15882  |
| Multiple Sclerosis            | IMSGC & WTCCC2                                    | 21833088    | Bayesian clustering approach to exclude outlying individuals on the basis of call rate and heterozygosity; gender mismatches, removal of related or cryptically related individuals (IBD >5%), removal of ancestry outliers using principal component analysis; SNP call rate (<0.98), MAF (<0.1%); Hardy-Weinberg P value (<10 <sup>-50</sup> ), frequency differences between genotyping plates | Linear mixed model, accounting for ancestry informative principal components                                                                                                             | NA | 9772   | 17376  |
| Osteoarthritis                | arcOGEN                                           | 22763110    | Sample call rate (<0.95-0.99); Genetic and phenotypic gender mismatch; Heterozygosity (visual removal of outliers); Removal of duplicates or cryptically related individuals (pairwise IBD>0.2); Removal of Non-European ancestry individuals based on comparison with HapMap populations; SNP call rate (<0.95-0.99), Hardy Weinberg P value (<10 <sup>-4</sup> ),                               | Imputation to 1KG (2010 interim release); logistic regression model; fixed-effects, inverse variance-weighted meta-analysis                                                              | 1  | 7406   | 11002  |
| Parkinson's disease           | IPDGC                                             | 21292315    | Cut offs differ between cohorts, criteria include sample call rate, gender mismatch, sample duplicates or cryptically related individuals, ancestry outliers; SNP call rate, Hardy-Weinberg P value, MAF , difference in SNP call rate between cases and controls                                                                                                                                 | Imputation to 1KG (2009 low coverage release), logistic regression models adjusting for ancestry informative principal components, fixed effects inverse variance weighted meta-analysis | 5  | 5333   | 12019  |
| Schizophrenia                 | PGC                                               | 23974872    | Sample call rate (<0.98), removal of duplicates or cryptically related individuals (IBD>0.2) heterozygosity ( $F_{het} \pm 0.2$ ), ; SNP call rate (<0.98); differential SNP call rate between cases and controls (>0.02), Hardy-Weinberg P value (controls <10 <sup>-6</sup> , cases <10 <sup>-10</sup> )                                                                                        | Imputation to 1KG phase I, logistic regression including ancestry informative principal components, inverse variance weighted fixed effects meta-analysis                                | 37 | 13,833 | 18,462 |
| Type 1 diabetes               |                                                   | 21980299    | Sample call rate (<0.98), sample duplicates or cryptically related individuals using IBS, population outliers (>±6 SD on any of the top ten principal components); SNP call rate (<0.95); Hardy-Weinberg P value (<10 <sup>-5</sup> ), MAF (<1%)                                                                                                                                                  | Imputation to HapMap, Logistic regression model adjusting for ancestry informative principal components; fixed-effects, inverse variance-weighted meta-analysis                          | 5  | 9934   | 16956  |
| Breast cancer                 | Breast Cancer Association Consortium              | 23535729    | Exclusion of individuals genotypically not female, sample call rate (<0.95) low or high heterozygosity; genotypes discrepancies with previous BCAC genotyping; duplicates and cryptically related relatives (first-                                                                                                                                                                               | Logistic regression, including study and principal components as covariates.                                                                                                             | 41 | 48155  | 43612  |



|                                         |                       |             |                                                                                                                                                                                                                                                                                                                                                                                                                                                                                                                                               |                                                                                                                                                                                                                                                                                                                                                                                                                                                                                                                                                       |             |             |
|-----------------------------------------|-----------------------|-------------|-----------------------------------------------------------------------------------------------------------------------------------------------------------------------------------------------------------------------------------------------------------------------------------------------------------------------------------------------------------------------------------------------------------------------------------------------------------------------------------------------------------------------------------------------|-------------------------------------------------------------------------------------------------------------------------------------------------------------------------------------------------------------------------------------------------------------------------------------------------------------------------------------------------------------------------------------------------------------------------------------------------------------------------------------------------------------------------------------------------------|-------------|-------------|
|                                         |                       |             | degree based on IBS), removal of ancestry outliers based on comparison with HapMap 2 populations; SNP call rates (<0.95), Hardy-Weinberg equilibrium ( $P < 1 \times 10^{-7}$ controls); SNPs with discrepancies in more than 2% of duplicate samples.                                                                                                                                                                                                                                                                                        |                                                                                                                                                                                                                                                                                                                                                                                                                                                                                                                                                       |             |             |
| Childhood acute lymphoblastoid lymphoma | 19684604;<br>23996088 |             | Removal of cryptically related individuals based on IBS (>80%); Exclusion of non-European individuals by comparison with CEU hapmap reference panel, Hardy-Weinberg equilibrium ( $P < 10^{-5}$ in controls); MAF (<1%); SNP call rate (<95%)                                                                                                                                                                                                                                                                                                 | Unconditional logistic regression, fixed effect inverse variance weighted meta-analysis                                                                                                                                                                                                                                                                                                                                                                                                                                                               | 2           | 1987 7224   |
| Chronic lymphocytic leukemia            | 24292274              |             | Removal of cryptically related individuals based on IBS (>80%); Exclusion of non-European individuals by comparison with CEU hapmap reference panel, Hardy-Weinberg equilibrium ( $P < 10^{-5}$ in controls); MAF (<1%); SNP call rate (<95%)                                                                                                                                                                                                                                                                                                 | Unconditional logistic regression, fixed effect inverse variance weighted meta-analysis                                                                                                                                                                                                                                                                                                                                                                                                                                                               | 2 consortia | 1739 5199   |
| Colorectal cancer                       | 24737748              |             | Removal of cryptically related individuals based on IBD (>6.25%); Exclusion of non-European individuals by comparison with CEU hapmap reference panel, GenCall score (<0.25), Info score (<0.4), Hardy-Weinberg equilibrium ( $P < 10^{-4}$ in controls, $10^{-6}$ in cases); MAF (<1%); SNP call rate (<0.95)                                                                                                                                                                                                                                | 1KG phase I imputation, unconditional logistic regression, fixed effect inverse variance weighted meta-analysis                                                                                                                                                                                                                                                                                                                                                                                                                                       | 5           | 5626 7817   |
| Lung cancer                             | 24880342              |             | Sample call rate (<0.95), X-chromosome heterozygosity rate (different cut-offs across studies); Removal of first degree relatives (genome-wide IBD >0.2), Autosomal heterozygosity (>6 SD from sample mean); < 80% probability of being Caucasian ancestry; SNP call rate (<0.95); MAF (<1%), Hardy-Weinberg-Equilibrium ( $P < 10^{-4}$ )                                                                                                                                                                                                    | 1KG phase I imputation, unconditional logistic regression, fixed effect inverse variance weighted meta-analysis                                                                                                                                                                                                                                                                                                                                                                                                                                       | 4           | 11348 15861 |
| Melanoma                                | GenoMEL               | Unpublished | Imputation was conducted genome-wide separately on each study, following a shared protocol. SNPs with either MAF<0.03 or MAF<0.01, control HWE p-value< $10^{-4}$ (in controls) or missingness >0.03 were excluded, as were any individuals with call rates <0.97, identified as first degree relatives and/or European outliers (as identified by principal components analysis using PCA/Eigenstrat). In addition, in each study where samples were genotyped on more than one chip, any SNP not present on all chips were removed prior to | Imputed genotypes were analysed as expected genotype counts based on the posterior probabilities (gene dosage) using SNPTEST2 assuming an additive model with geographic region as a covariate. Only those with an imputation quality ('INFO') score >0.8 were analysed. Potential stratification was dealt with in the GenoMEL samples by including geographic region as a covariate (inclusion of principal components as covariates was previously found to make little difference) and elsewhere by including principal components as covariates. | 10          | 12320 17576 |

|                                                                             |       |                                                 |                                                                                                                                                                                                                                                                                                                                                     |                                                                                                                                                                                                                                                                                                     |          |      |             |
|-----------------------------------------------------------------------------|-------|-------------------------------------------------|-----------------------------------------------------------------------------------------------------------------------------------------------------------------------------------------------------------------------------------------------------------------------------------------------------------------------------------------------------|-----------------------------------------------------------------------------------------------------------------------------------------------------------------------------------------------------------------------------------------------------------------------------------------------------|----------|------|-------------|
|                                                                             |       |                                                 | imputation to avoid bias. IMPUTEv2 was used for imputation                                                                                                                                                                                                                                                                                          | Heterogeneity of per SNP effect sizes in studies contributing to the meta-analyses was assessed using the $I^2$ metric. For all SNPs $I^2$ was less than 31% so a fixed effects model was used                                                                                                      |          |      |             |
| Multiple myeloma                                                            |       | 23955597                                        | Removal of cryptically related individuals based on IBS (>0.8); Exclusion of non-European individuals by comparison with CEU hapmap reference panel, Hardy-Weinberg equilibrium ( $P < 10^{-6}$ in controls); MAF (<1%); SNP call rate (<0.95)                                                                                                      | Fixed effect meta-analysis                                                                                                                                                                                                                                                                          | 2        | 2312 | 7298        |
| Renal cell carcinoma                                                        |       | 23184150                                        | Sample call rate (<0.97), gender mismatch, cryptic relatedness based on IBD (>0.185), Exclusion of non-European individuals by comparison with CEU hapmap reference panel, Hardy-Weinberg equilibrium ( $P < 10^{-5}$ in controls); MAF (<1%); SNP call rate (<0.95), different missing genotype rates between cases and controls ( $P < 10^{-5}$ ) | 1KG phase I imputation, unconditional logistic regression, fixed effect inverse variance weighted meta-analysis                                                                                                                                                                                     | 5        | 2215 | 3369        |
| Tuberculosis                                                                |       | unpublished                                     | Sample call rate (<0.98), sample duplicates or cryptically related individuals using IBS (> 80%), heterozygosity (> 3.5 SD), ancestry outliers; SNP call rate (<0.98), Hardy-Weinberg P-value (< 10 <sup>-6</sup> ), missing rate per SNP difference in cases and controls (> 0.02), MAF (<1%).                                                     | Imputation to HapMap, Logistic regression model adjusting for ancestry informative principal components.                                                                                                                                                                                            | 1        | 5530 | 5607        |
| Anthropometric traits (Height, BMI, WHR, waist circumference)               | GIANT | 23754948                                        | QC on study level according to standard protocols                                                                                                                                                                                                                                                                                                   | Imputation to HapMap PhII CEU, linear regression model, fixed effect inverse variance weighted meta-analysis                                                                                                                                                                                        | Up to 46 |      | Up to 75819 |
| Glycemic traits (Glucose, fasting insulin, 2h glucose, Proinsulin, HbA1c)   | MAGIC | 21873549;<br>20858683;<br>20081857;<br>20081858 | QC on study level according to standard protocols                                                                                                                                                                                                                                                                                                   | linear regression model, fixed effect inverse variance weighted meta-analysis                                                                                                                                                                                                                       | Up to 26 |      | Up to 46368 |
| Lipids (Total-cholesterol, LDL-cholesterol, HDL-cholesterol, Triglycerides) | GLGC  | 20686565                                        | Study specific QC, plus MAF (< 0.01), poor imputation quality (Rs <sub>q</sub> /Info < 0.3)                                                                                                                                                                                                                                                         | Imputation to HapMap PhII CEU, linear regression (or mixed linear regression in family based studies) on residuals obtained after adjustment for age, age <sup>2</sup> , sex, and a ancestry informative principal components in some studies, fixed effect inverse variance weighted meta-analysis | Up to 51 |      | Up to 94569 |
| Lipid sub fractions and metabolites (NMR)                                   |       | 22286219                                        | Sample call rate (<0.95), cryptically related individuals, gender mismatches, SNP call rate (<0.95),                                                                                                                                                                                                                                                | Imputation to 1KG and HapMap PhIII, linear regression on standardised residuals, obtained after adjustment for age, sex and ancestry-informative principal components, fixed effect inverse variance weighted meta-analysis                                                                         | 5        |      | 8330        |
| Metabolites                                                                 |       | 24816252                                        | Sample call rate (<0.98), heterozygosity ( $\pm > 2$ SD from the mean), exclusion of non-European                                                                                                                                                                                                                                                   | Imputation to HapMap PhII, linear regression models adjusting for age, sex and batch effects,                                                                                                                                                                                                       | 2        |      | 7824        |

|                                                                               |          |          |                                                                                                                                                                                                                               |                                                                                                                                                                                                                                                                    |         |             |
|-------------------------------------------------------------------------------|----------|----------|-------------------------------------------------------------------------------------------------------------------------------------------------------------------------------------------------------------------------------|--------------------------------------------------------------------------------------------------------------------------------------------------------------------------------------------------------------------------------------------------------------------|---------|-------------|
|                                                                               |          |          | ancestry individuals based on comparison with HapMap3 populations; Hardy-Weinberg Pvalue ( $<10^{-6}$ ), MAF ( $<1\%$ ), SNP call rate ( $<0.97$ ),                                                                           | fixed effect inverse-variance weighted meta-analysis                                                                                                                                                                                                               |         |             |
| Soluble adhesion molecules (sICAM1 & sP-selectin)                             | CHARGE   | 20167578 | Study specific QC                                                                                                                                                                                                             | linear regression (or mixed linear regression in family based studies), fixed effect inverse variance weighted meta-analysis                                                                                                                                       | Up to 4 | Up to 8984  |
| White blood cell counts (differential)                                        | CHARGE   | 21738480 | Sample call rate ( $<0.95$ ), exclusion of non-European ancestry individuals based on multiple dimensional-scaling vectors, gender mismatches, MAF ( $<1\%$ ), SNP call rate ( $<0.95$ ), Hardy-Weinberg Pvalue ( $10^{-7}$ ) | Imputation to HapMap PhII, linear regression models adjusting for age, sex and smoking status, fixed effect inverse-variance weighted meta-analysis                                                                                                                | Up to 7 | Up to 19509 |
| Carotid intima-media thickness and presence of carotid atherosclerotic plaque | CHARGE   | 21909108 | Varying QC measures and cut-offs according to studies.                                                                                                                                                                        | Imputation to HapMap, linear regression models (or linear mixed effects models) for carotid intima-media thickness; logistic regression models (or general estimating equations clustering on family to account for familial correlations) for presence of plaque. | 9       | 31211       |
| Carotid-femoral pulse wave velocity                                           | AortaGen | 22068335 | Study specific QC                                                                                                                                                                                                             | Imputation to HapMap, linear regression (or mixed linear regression in family based studies) standardized regression residual, adjusted for age, age <sup>2</sup> , height, and weight, fixed effect inverse variance weighted meta-analysis                       | 9       | 20634       |

PMID = PubMed identifiers of relevant publications.

**S-Table 9: Details on CHD studies contributing tabular data for estimation of dose-response relationship**

| Acronym         | Reference<br>(PMID) | Full name                                                                            | Case definition                                                                                                                                                                                                                                                                                                                                                                                                                                                                                                                                                                                               | SNPs<br>provided |           |           | N cases | N controls |
|-----------------|---------------------|--------------------------------------------------------------------------------------|---------------------------------------------------------------------------------------------------------------------------------------------------------------------------------------------------------------------------------------------------------------------------------------------------------------------------------------------------------------------------------------------------------------------------------------------------------------------------------------------------------------------------------------------------------------------------------------------------------------|------------------|-----------|-----------|---------|------------|
|                 |                     |                                                                                      |                                                                                                                                                                                                                                                                                                                                                                                                                                                                                                                                                                                                               | rs6743376        | rs6761276 | rs1542176 |         |            |
| ADVANCE         | 18443000            | Atherosclerotic Disease, Vascular function, and genetic Epidemiology                 | Clinical non-fatal CAD including MI, typical angina with $\geq 1$ artery with $>50\%$ stenosis, positive non-invasive test, or PCI or CABG                                                                                                                                                                                                                                                                                                                                                                                                                                                                    |                  | x         | x         | 278     | 312        |
| AGES-Reykjavik  | 17351290            | Age, Gene/Environment Susceptibility-Reykjavik Study                                 | Fatal and non-fatal confirmed MI                                                                                                                                                                                                                                                                                                                                                                                                                                                                                                                                                                              | x                |           | x         | 642     | 2542       |
| BHF-FHS / WTCCC | 17554300            | British Heart Foundation Family Heart Study / Wellcome Trust Case Control Consortium | Validated MI, CABG, PTCA or angina with positive noninvasive testing $<66$ yrs                                                                                                                                                                                                                                                                                                                                                                                                                                                                                                                                | x                |           | x         | 1873    | 2834       |
| BRAVE           | See above           | Bangladesh Risk of Acute Vascular Events                                             | Confirmed MI, see above                                                                                                                                                                                                                                                                                                                                                                                                                                                                                                                                                                                       | x                |           | x         | 1820    | 1644       |
| CCHS            | See above           | Copenhagen City Heart Study                                                          | Fatal and non-fatal MI and other major acute coronary events, according to ICD-10 codes I20-I25                                                                                                                                                                                                                                                                                                                                                                                                                                                                                                               | x                |           | x         | 1999    | 6559       |
| CHS             | 1669507             | Cardiovascular Health Study                                                          | MI, possible and definite fatal CHD, sudden death within an hour of symptoms                                                                                                                                                                                                                                                                                                                                                                                                                                                                                                                                  | x                |           | x         | 854     | 2417       |
| CIHDS/CGPS      | See above           | Copenhagen Ischaemic Heart Disease Study / Copenhagen General Population Study       | Fatal and non-fatal MI and other major acute coronary events, according to ICD-10 codes I20-I25                                                                                                                                                                                                                                                                                                                                                                                                                                                                                                               | x                |           | x         | 2703    | 2803       |
| deCODE          | 17478679            | deCODE genetics coronary heart disease study                                         | MI (MONICA criteria) before the age of 75 in Iceland between 1981 and 2002, angiography and percutaneous coronary interventions (PCI) (nationwide clinical registries), additional subjects diagnosed with significant angiographic CAD ( $>50\%$ stenosis), individuals with CAD discharge diagnoses (ICD 9 codes 410.*, 411.*, 412.*, 414.*, or ICD 10 codes I20.0, I21.*, I22.*, I23.*, I24.*, I25.*), from the Landspítali University Hospital in Reykjavik, individuals where cause of death or contributing cause of death listed as MI or chronic ischaemic heart disease (ICD 9 or 10 codes) in death | x                |           | X         | 15,318  | 62,353     |

|                 |                      |                                                                    |                                                                                                                                   |   |   |   |       |      |
|-----------------|----------------------|--------------------------------------------------------------------|-----------------------------------------------------------------------------------------------------------------------------------|---|---|---|-------|------|
|                 |                      |                                                                    | registries, subjects undergoing coronary artery bypass grafting (CABG) procedures at Landspítali University Hospital in Reykjavik |   |   |   |       |      |
| EPIC-CVD        | See above            | European Prospective Investigation into Cancer and Nutrition Study | Fatal and non-fatal MI and other major acute coronary events, according to ICD-10 codes I20-I25                                   | x |   | x | 10288 | 7292 |
| GerMIFS I-V     | 17634449<br>19198612 | German MI Family studies                                           | MI MONICA criteria                                                                                                                | x |   | x | 6314  | 7071 |
| HPS             | 12114036             | Heart Protection Study                                             | History of MI, unstable or stable angina, CABG, or angioplasty                                                                    | x |   | x | 2652  | 2717 |
| ITH             | 20031563             | Interheart Study                                                   | Incident acute MI, presenting to a hospital within 24 hours of symptom onset                                                      | x |   | x | 387   | 437  |
| LOLIPOP         | 21378988             | London Life Sciences Prospective Population                        | History of MI, CABG, PTI or angiographically confirmed coronary artery stenosis greater than 50%                                  |   | x | x | 2794  | 3759 |
| LURIC           | 11258203             | The Ludwigshafen Risk and Cardiovascular Health study              | Angiography (>50% coronary stenosis)                                                                                              | x |   | x | 2095  | 923  |
| MedStar         | 21239051             | -                                                                  | Patients with one or more coronary vessels with ≥50% stenosis and a history or presentation of MI                                 |   | x | x | 408   | 442  |
| MIGen           | 19198609             | Myocardial Infarction Genetics Consortium                          | Confirmed MI                                                                                                                      |   | x | X | 2957  | 3071 |
| OHGS / CCGB     | 20729558<br>22319020 | Ottawa Heart Genomics Study / Cleveland Clinic GeneBank            | At least one of the following criteria: a stenosis in a major epicardial vessel of at least 50%; PCI; CABG or MI                  | x |   | X | 4516  | 3098 |
| PennCath        | 21239051             | -                                                                  | Patients with one or more coronary vessels with ≥50% stenosis and a history or presentation of MI                                 |   | x | x | 433   | 437  |
| PROCARDIS       | 21378988             | -                                                                  | MI or acute coronary syndrome, unstable or stable angina, CABG                                                                    | x |   | X | 1189  | 1125 |
| PROMIS          | See above            | Pakistan Risk of Myocardial Infarction study                       | Confirmed MI, see above                                                                                                           | x |   | x | 10235 | 9411 |
| Rotterdam Study | 20031568             | -                                                                  | Definite or probable MI, PTCA or CABG,                                                                                            | x |   | x | 777   | 5127 |

**Total**

**70,532**

**126,374**

PMID = PubMed identifiers of relevant publications.

**S-Table 10:** Association of the genetic score with metabolites and imaging biomarkers

Available online at <http://www.phpc.cam.ac.uk/ceu/il-1-genetics-consortium/>

For all traits except Carotid-Femoral Pulse Wave Velocity, analyses combined the effects of primary score SNPs rs1542176 and rs6743376 using fixed-effects meta-analysis. For Carotid-Femoral Pulse Wave Velocity rs6761276 was used as proxy for rs6743376 instead. I<sup>2</sup> values and heterogeneity p-values refer to between SNP heterogeneity.

**S-Table 11: Summary of clinical trials of 75/100mg anakinra providing inflammatory biomarker information**

| First author   | Year | Study ID                                      | Dose  | Frequency | Duration | Patient population                                                               | Location                                                   | Background medication                                                        | IL-1Ra    |           | IL-6       |            | CRP        |            |
|----------------|------|-----------------------------------------------|-------|-----------|----------|----------------------------------------------------------------------------------|------------------------------------------------------------|------------------------------------------------------------------------------|-----------|-----------|------------|------------|------------|------------|
|                |      |                                               |       |           |          |                                                                                  |                                                            |                                                                              | N drug    | N placebo | N drug     | N placebo  | N drug     | N placebo  |
| Bresnihan B    | 1998 | N/R                                           | 75mg  | Daily     | 24 weeks | Rheumatoid arthritis                                                             | 41 centers in 11 European countries                        | NSAIDs and/or Corticosteroids                                                |           |           |            |            | 115        | 118        |
| Cohen S        | 2002 | N/R                                           | 75mg  | Daily     | 24 weeks | Rheumatoid arthritis                                                             | 36 centers (31 in the US, 3 in Canada, and 2 in Australia) | MTX, NSAIDs and or corticosteroids                                           |           |           |            |            | 44         | 38         |
| Cohen SB       | 2004 | 990145 Study                                  | 100mg | Daily     | 24 weeks | Rheumatoid arthritis                                                             | Multicentre trial, US                                      | MTX, NSAIDs and or corticosteroids                                           |           |           |            |            | 250        | 251        |
| Larsen CM      | 2007 | NCT00303394                                   | 100mg | Daily     | 13 weeks | Type 2 diabetic patients                                                         | 2 centres in Denmark and Switzerland                       | Antidiabetics                                                                |           |           | 34         | 33         | 34         | 33         |
| Van Tassell BW | 2014 | NCT01542502                                   | 100mg | Daily     | 4 weeks  | Patients with Heart failure according to New York Heart Association class II-III | Virginia Commonwealth University, US                       | Furosemide, ACE-inhibitors, b-blockers, spironolactone, statins, aspirin     |           |           |            |            | 12         | 12         |
| Hung AM        | 2011 | NCT00420290                                   | 100mg | 3x/week   | 4 weeks  | Maintenance haemodialysis patients                                               | Single centre study, Nashville, US                         | NR                                                                           |           |           | 7          | 7          | 7          | 7          |
| Moran A        | 2013 | NCT00711503                                   | 100mg | Daily     | 36 weeks | Patients with recent-onset type 1 diabetes                                       | Multicentre trial at 14 centres across Europe              | Insulin                                                                      | 24        | 25        | 25         | 26         | 25         | 26         |
| Morton AC)     | 2014 | EUCTR: 2006-001767-31-GB; MRC ILA Heart Study | 100mg | Daily     | 2 weeks  | Patients with Non-STEMI                                                          | 5 centres in the UK                                        | aspirin, clopidogrel, statins, ACE inhibitors, angiotensin receptor blockers |           |           | 76         | 70         | 80         | 73         |
| <b>Total</b>   |      |                                               |       |           |          |                                                                                  |                                                            |                                                                              | <b>24</b> | <b>25</b> | <b>142</b> | <b>136</b> | <b>567</b> | <b>558</b> |

**S-Figure 4** provides a flow chart of the systematic review strategy used to create this table.

**S-Table 12: Summary of clinical trials of IL-1 $\alpha$ / $\beta$  blocking agents and cardiovascular related serious adverse events (SAEs)**

| First author            | Year | Study ID                                      | Drug     | Dose                       | Frequency | Duration | Patient population                                                      | n total drug | n total placebo | Type of cardiovascular serious adverse event                              | Events drug arm | Events placebo arm |
|-------------------------|------|-----------------------------------------------|----------|----------------------------|-----------|----------|-------------------------------------------------------------------------|--------------|-----------------|---------------------------------------------------------------------------|-----------------|--------------------|
| Cardiel MH              | 2010 | NCT00293826                                   | AMG 108  | 50 / 125 / 250 mg          | 4 weekly  | 24 weeks | Rheumatoid arthritis                                                    | 604          | 201             | None reported                                                             | 0               | 0                  |
| Cohen SB                | 2011 | NCT00110942 -Part A & B                       | AMG 108  | 75, 100, 300mg             | 4 weekly  | 12 weeks | Patients with osteoarthritis                                            | 128          | 95              | Unstable angina in AMG108 group, coronary artery disease in placebo group | 1               | 1                  |
| Bresnihan B             | 1998 |                                               | Anakinra | 30, 75, 150mg              | Daily     | 24 weeks | Rheumatoid arthritis                                                    | 351          | 121             | None reported                                                             | 0               | 0                  |
| Cohen S                 | 2002 |                                               | Anakinra | 0.04, 0.1, 0.4, 1, 2 mg/kg | Daily     | 24 weeks | Rheumatoid arthritis                                                    | 345          | 74              | Chest pain (unclear whether cardiac or not)                               | 2               | 0                  |
| Fleischmann RM          | 2003 | 990757 Study                                  | Anakinra | 100mg                      | Daily     | 24 weeks | Rheumatoid arthritis patients                                           | 1116         | 283             | Death due to MI                                                           | 0               | 1                  |
| Schiff MH               | 2004 |                                               |          |                            |           |          |                                                                         |              |                 | Chest pain                                                                | 2               | 2                  |
| Cohen SB                | 2004 | 990145 Study                                  | Anakinra | 100mg                      | Daily     | 24 weeks | Rheumatoid arthritis patients                                           | 250          | 251             | None reported                                                             | 0               | 0                  |
| Genovese MC             | 2004 | 20000223 Study                                | Anakinra | 100mg                      | Daily     | 24 weeks | Rheumatoid arthritis patients                                           | 162          | 80              | Chestpain, cardiac                                                        | 1               | 0                  |
| Charatcharoenwitthaya N | 2007 |                                               | Anakinra | 100mg                      | Daily     | 3 weeks  | Healthy postmenopausal women                                            | 14           | 13              | None reported                                                             | 0               | 0                  |
| Larsen CM               | 2007 | NCT00303394                                   | Anakinra | 100mg                      | Daily     | 13 weeks | Type 2 diabetic patients                                                | 34           | 35              | None reported                                                             | 0               | 0                  |
| Ilowite N               | 2009 | NCT00037648                                   | Anakinra | 1mg/kg; 100mg max          | Daily     | 16 weeks | Juvenile rheumatoid arthritis patients                                  | 25           | 25              | None reported                                                             | 0               | 0                  |
| Abbate A                | 2010 | NCT00789724                                   | Anakinra | 100mg                      | Daily     | 2 weeks  | Patients with suspected STEMI                                           | 5            | 5               | Acute coronary syndrome                                                   | 1               | 1                  |
|                         |      |                                               |          |                            |           |          |                                                                         |              |                 | Unstable angina                                                           | 1               | 0                  |
| Niu X                   | 2011 |                                               | Anakinra | 80mg                       | Daily     | 24 weeks | Rheumatoid arthritis patients                                           | 38           | 12              | None reported                                                             | 0               | 0                  |
| Quartier P              | 2011 | NCT00339157                                   | Anakinra | 2mg/kg, max 100mg          | Daily     | 4 weeks  | Juvenile idiopathic arthritis                                           | 12           | 12              | None reported                                                             | 0               | 0                  |
| Abbate A                | 2013 | NCT01175018                                   | Anakinra | 100mg                      | Daily     | 2 weeks  | Patients with STEMI                                                     | 15           | 15              | Recurrent MI                                                              | 1               | 0                  |
|                         |      |                                               |          |                            |           |          |                                                                         |              |                 | Cardiac death                                                             | 0               | 1                  |
|                         |      |                                               |          |                            |           |          |                                                                         |              |                 | Repeat coronary revascularization (urgent & elective)                     | 3               | 5                  |
| Moran A                 | 2013 | NCT00711503                                   | Anakinra | 100mg                      | Daily     | 36 weeks | Patients with recent-onset diabetes (diagnosed <100d before enrollment) | 35           | 34              | None reported                                                             | 0               | 0                  |
| Morton AC               | 2014 | EUCTR: 2006-001767-31-GB; MRC ILA Heart Study | Anakinra | 100mg                      | Daily     | 52 weeks | Patients with Non-STEMI                                                 | 93           | 89              | Myocardial infarction                                                     | 8               | 2                  |



|                  |      |             |            |                                |                                             |             |                                                                                  |             |             |                                            |           |           |
|------------------|------|-------------|------------|--------------------------------|---------------------------------------------|-------------|----------------------------------------------------------------------------------|-------------|-------------|--------------------------------------------|-----------|-----------|
| Hoffman HM       | 2008 | NCT00288704 | Rilonacept | 160mg                          | Weekly                                      | 6 + 9 weeks | CAPS patients                                                                    | 23          | 24          | None reported                              | 0         | 0         |
| Schumacher HR Jr | 2012 | NCT00610363 | Rilonacept | 160mg                          | Weekly                                      | 16 weeks    | Patients with with hyperuricemia and gout                                        | 41          | 42          | None reported                              | 0         | 0         |
| Schumacher HR Jr | 2012 | NCT00829829 | Rilonacept | 80mg / 160mg                   | Weekly                                      | 20 weeks    | Patients with acute arthritis of primary gout or MSU crystals in the joint fluid | 161         | 79          | Coronary artery disease (nighttime angina) | 1         | 0         |
| Mitha E          | 2013 | NCT00958438 | Rilonacept | 80mg / 160mg                   | Weekly                                      | 16 weeks    | Patients with acute arthritis of primary gout or MSU crystals in joint fluid     | 166         | 82          | None reported                              | 0         | 0         |
| Lovell DJ        | 2013 | NCT01803321 | Rilonacept | 2.2mg/kg / 4.4mg/kg; 320mg max | 5 applications during 4 weeks (not regular) | 4 weeks     | Patients with systemic idiopathic juvenile arthritis                             | 17          | 7           | None reported                              | 0         | 0         |
| Drevlow BE       | 1996 |             | sIL1R1     | 125,250,500,100 ug/m2          | Daily                                       | 4 weeks     | Rheumatoid arthritis                                                             | 19          | 4           | None reported                              | 0         | 0         |
| <b>Total</b>     |      |             |            |                                |                                             |             |                                                                                  | <b>3654</b> | <b>1583</b> |                                            | <b>21</b> | <b>13</b> |

**S-Figure 4** provides a flow chart of the systematic review strategy used to create this table.

# **S-Figure 1: Interleukin-1 (IL-1) signalling and blockage by IL-1Ra / anakinra and other agents.**

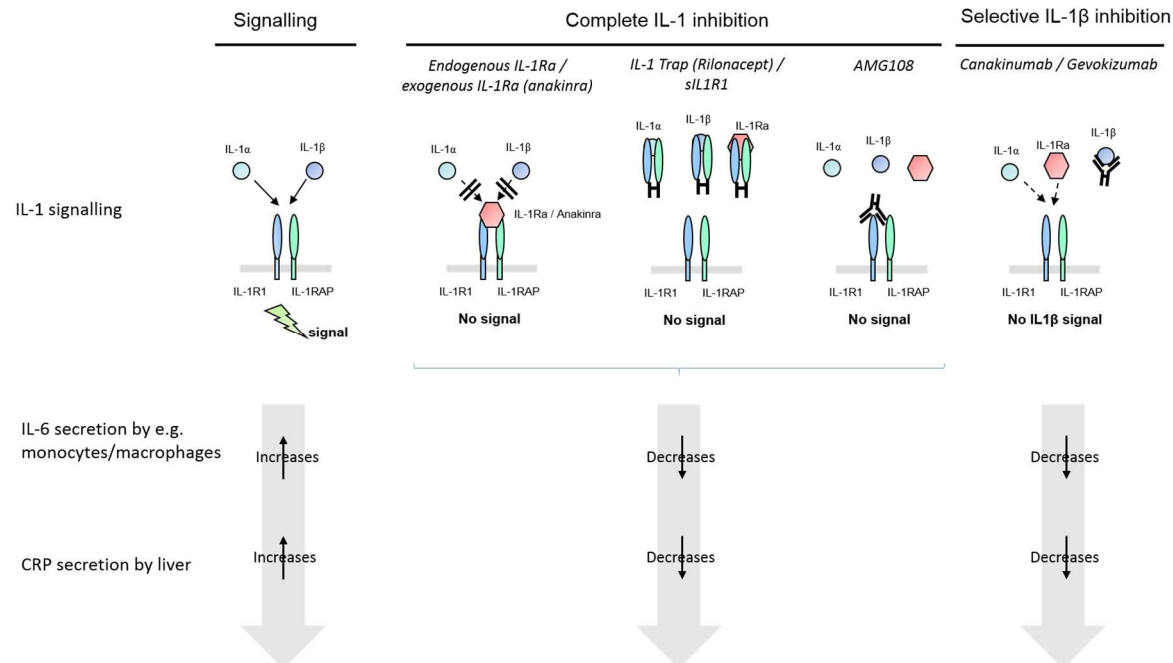

IL-1 isoforms IL-1α and IL-1β promote signalling by binding to the heterodimeric IL-1 receptor composed of the IL-1 receptor 1 (IL-1R1) and IL-1 receptor accessory protein (IL-1RAP), leading to stimulation of interleukin-6 (IL-6) secretion and further stimulation of the release of systemic inflammatory markers like C-reactive protein (CRP) (left panel). IL-1 receptor antagonist (IL-1Ra) or the recombinant form anakinra competitively inhibit actions of IL-1α and IL-1β, thereby reducing the increase in downstream inflammatory markers IL-6 and CRP. IL-1 Trap (Rilonacept) and soluble IL1R1 serve as decoy receptors, binding IL-1α. IL-1β and IL-1Ra, while AMG108 specifically binds IL1R1. Similar to anakinra, these agents block broad IL-1 activity, in contrast to canakinumab and gevokizumab, which specifically bind and inhibit IL-1β actions only.

**S-Figure 2: *IL1RN* region, gene expression and linkage disequilibrium (LD) between SNPs.**

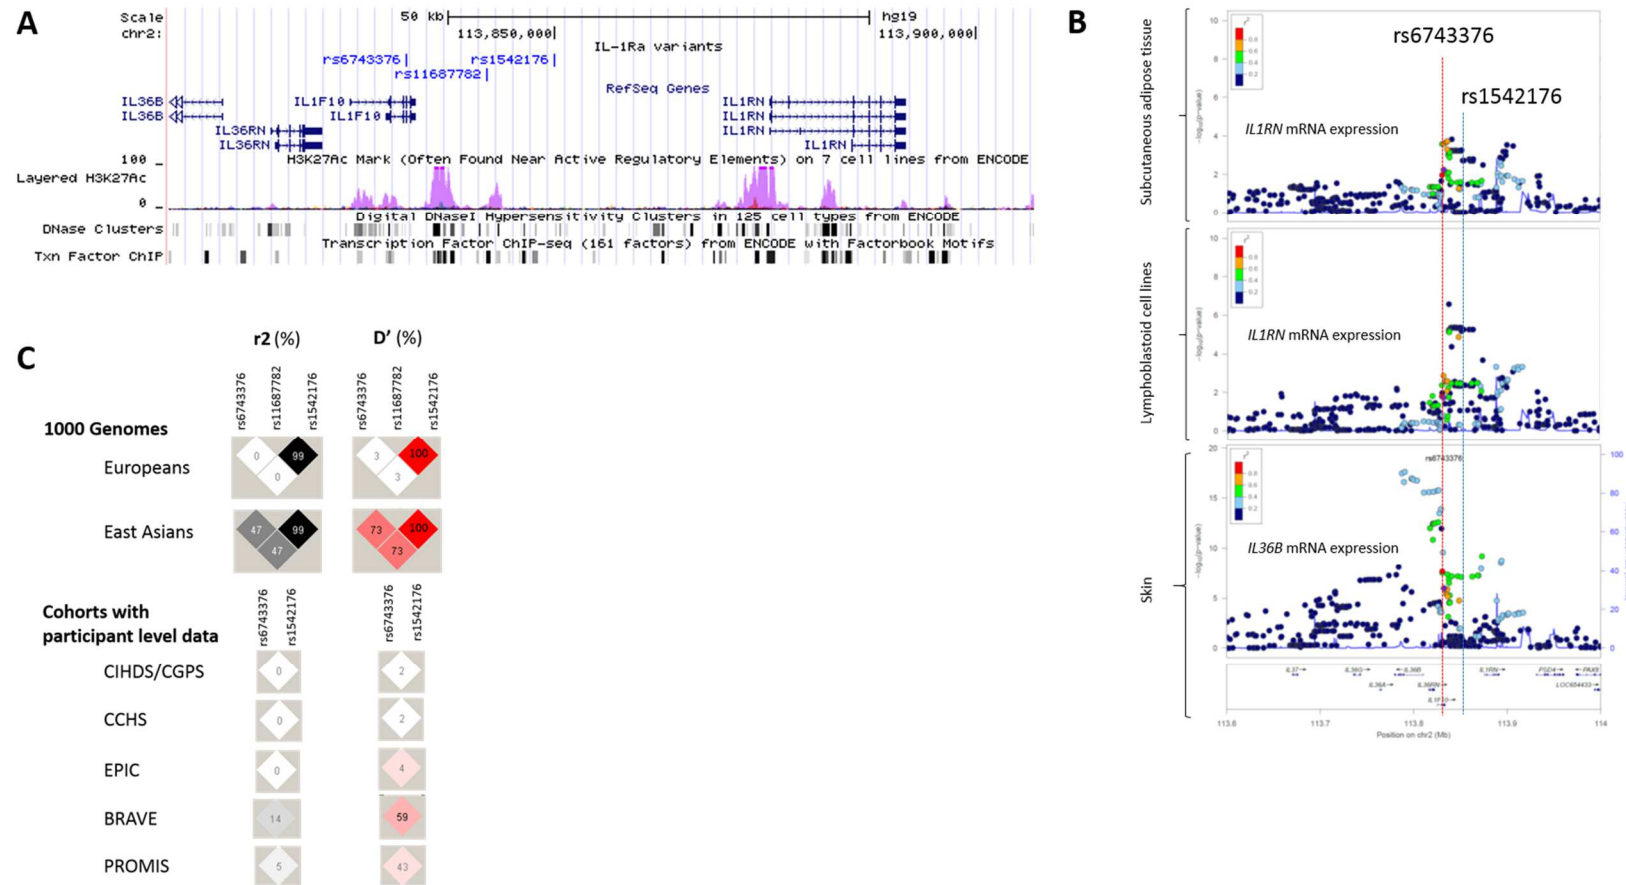

A) Functional genomic data, visualized using UCSC genome browser, showing location of SNPs (top), genetic context of *IL1RN* (middle) and Encyclopedia of DNA Elements (ENCODE) annotation (bottom). ENCODE annotation includes: i) histone acetylation marks (H3K27Ac) reflecting active genetic enhancer regions in 7 different cell lines. The only acetylation marks present in this region are found in Normal Human Epidermal Keratinocytes (represented by the purple peaks); ii) DNase I hypersensitivity clusters, indicating accessible DNA elements, hence likely to be of regulatory character and iii) transcription factor binding chromatin immuno-precipitation (ChIP) peaks indicating genetic regions found to bind to transcription factors. B) Regional association plots, showing association of genetic variants with mRNA expression of the *IL1RN* (top two panels) and the *IL36B* gene (bottom panel) in 850 individuals from the MuTHER consortium. Numerical values for the association of the genetic score are provided in **S-Table 1**. Plots were produced using LocusZoom (<http://csg.sph.umich.edu/locuszoom/>). Linkage disequilibrium plotted in relation to rs6743376. Positions of rs6743376 and rs1542176 indicated by dashed red and blue lines respectively. C) LD between the three key SNPs for 1000 Genomes phase I Europeans and East Asians (top) and studies with participant level data (bottom). Grey shading corresponds to  $r^2$  between SNPs, red shading corresponds to  $D'$  values between SNPs.

**S-Figure 3 Relationship of the genetic score variants with *IL1RN* mRNA expression and soluble interleukin-1 receptor antagonist concentration**

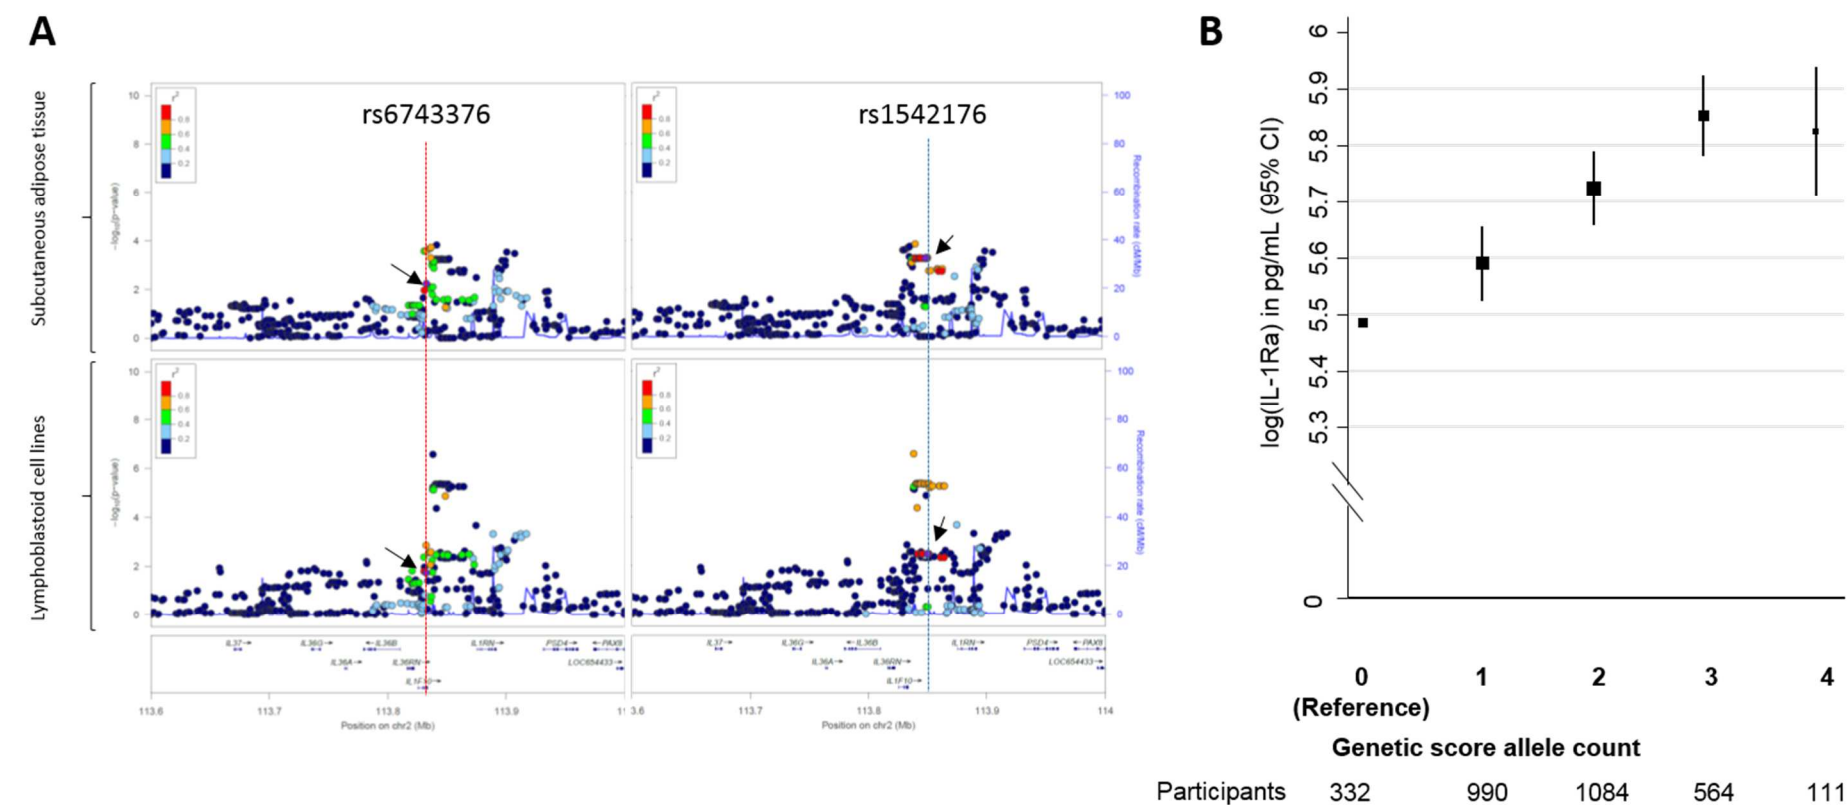

A) Regional association plot showing the association of genetic variants with *IL1RN* mRNA expression levels in subcutaneous adipose tissue (top row) and lymphoblastoid cell lines (bottom row) from 850 individuals in the Multiple Tissue Human Expression Resource consortium. Left column shows linkage disequilibrium pattern for variants in relation to rs6743376 (shown as purple marker and indicated by arrow-head), right column shows the same data but linkage disequilibrium in relation to rs1542176 (also shown as purple marker indicated by arrow-head). Numerical values for the association of the genetic score are provided in **S-Table 1**.

B) Relationship of allele counts of the genetic score (constructed from rs6743376 and rs1542176) with soluble interleukin-1 receptor antagonist concentration. Box sizes reflect number of participants.

**S-Figure 4: Flow chart of the systematic literature review for anakinra and other IL-1 $\alpha$ / $\beta$  blocking drugs**

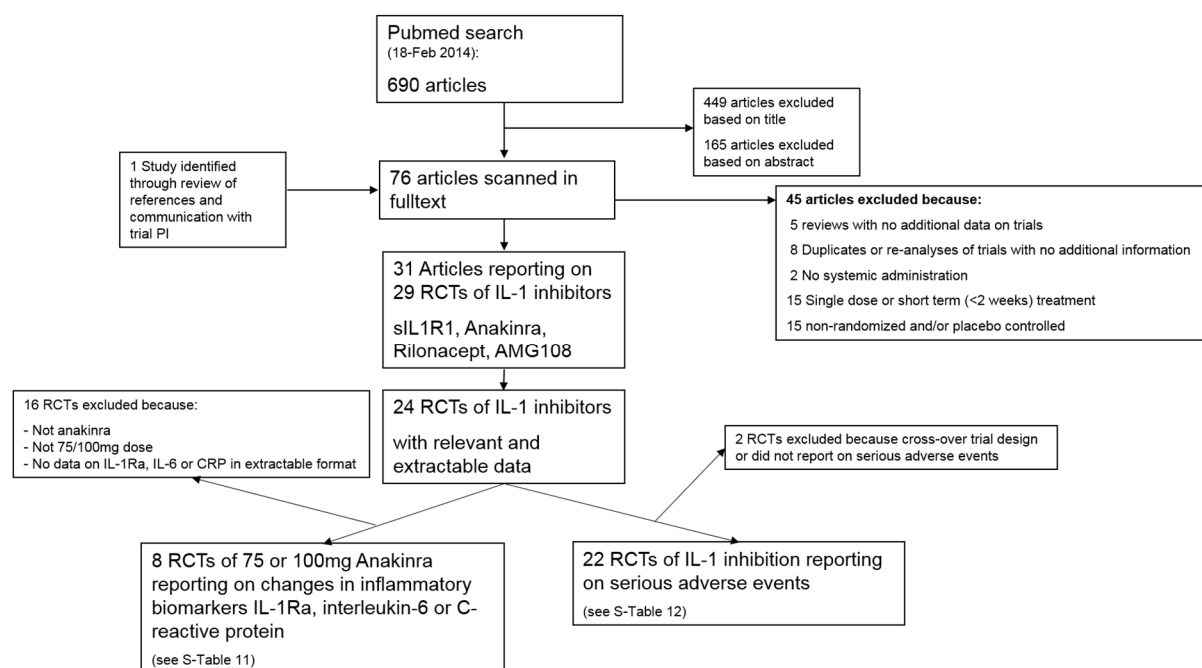

Details on studies identified through this systematic search are provided in **S-Tables 11 & 12**. Study level and meta-analysis results from the analysis of 75 or 100mg anakinra and inflammatory biomarkers are provided in **S-Figure 5**.

## S-Figure 5: Effect of 75/100 mg dose of anakinra on inflammation biomarkers in clinical trials

### IL-1Ra

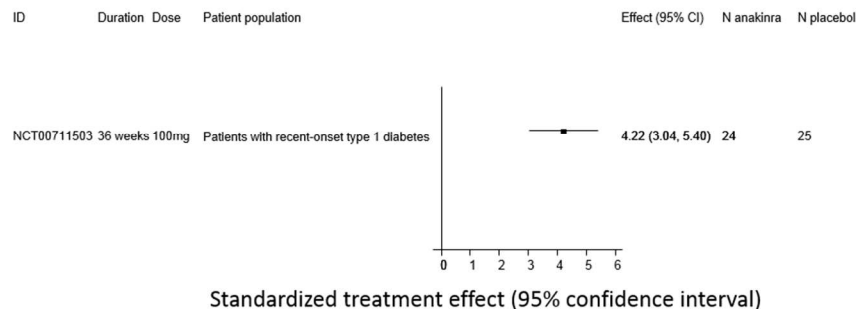

### IL-6

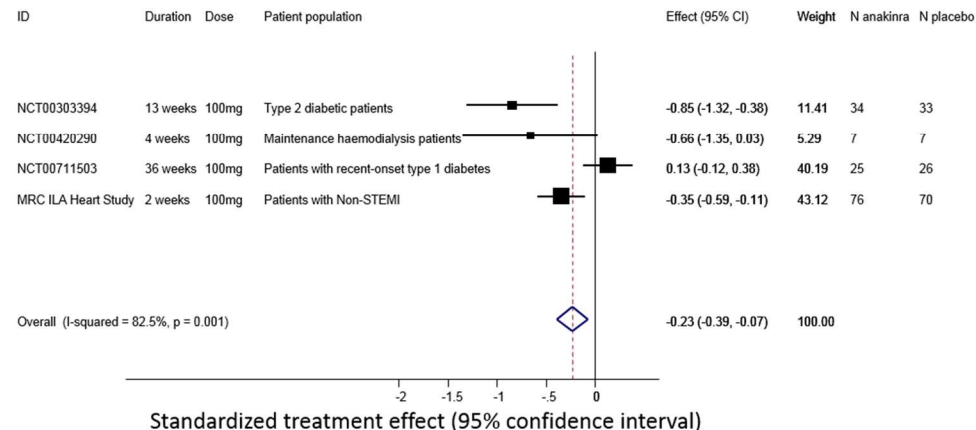

### CRP

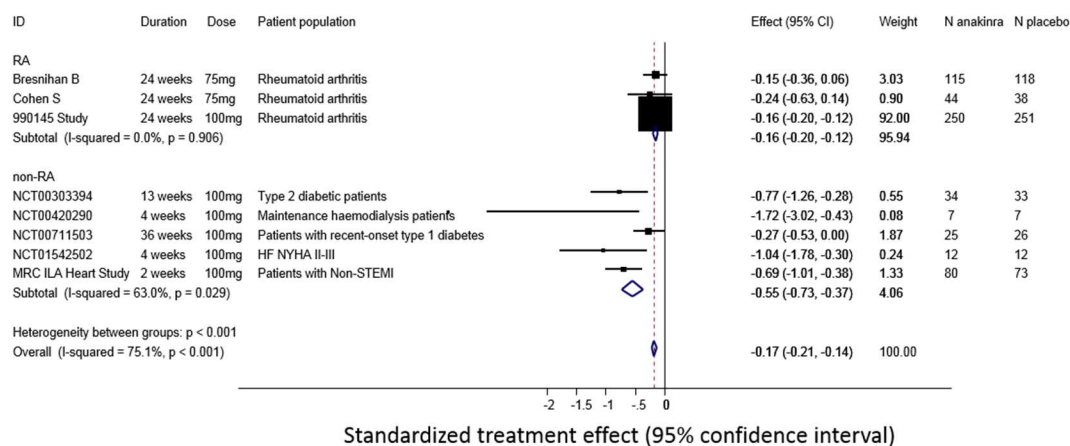

Blue diamonds reflect combined estimate from fixed effects inverse variance weighted meta-analysis. The combined estimates correspond to those in **Figure 2**. The corresponding study level characteristics are provided in **S-Table 11**.

**S-Figure 6: Individual and combined associations of the genetic score with inflammation biomarkers**

**IL-1Ra**

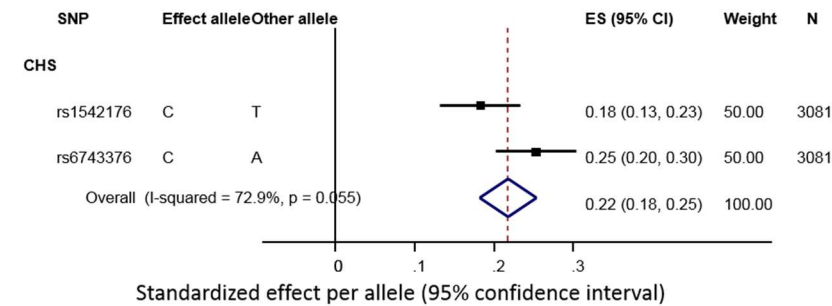

**CRP**

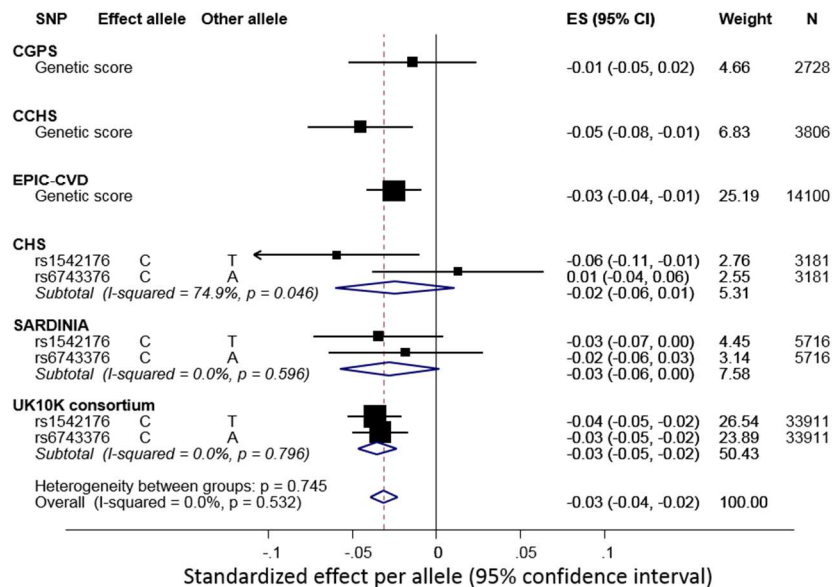

**IL-6**

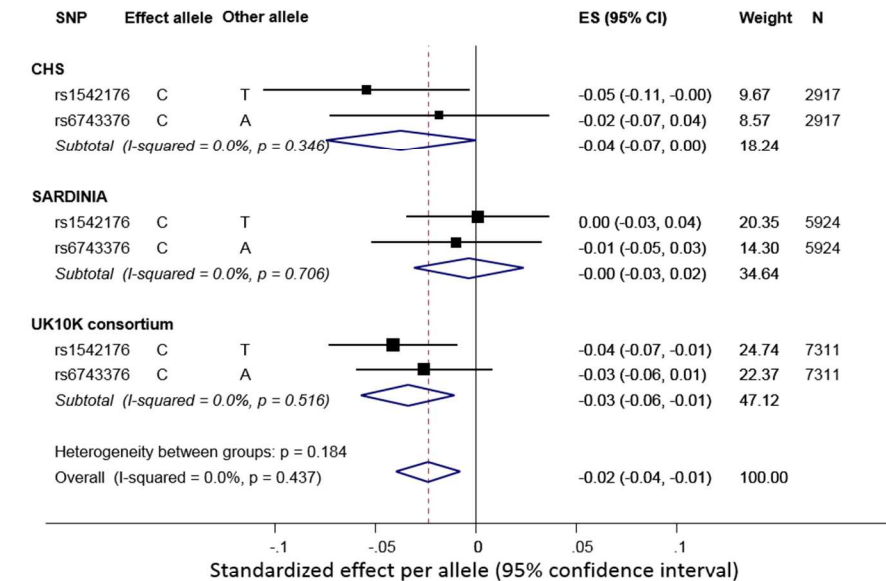

Blue diamonds reflect combined estimate from fixed effects inverse variance weighted meta-analysis. The combined estimates correspond to those in **Figure 2**. The corresponding study details are provided in **Table 1**, **S-Table 2** and **S-Table 7**.

**S-Figure 7: Individual and combined associations of the genetic score and individual SNPs with coronary disease risk using allele count data**

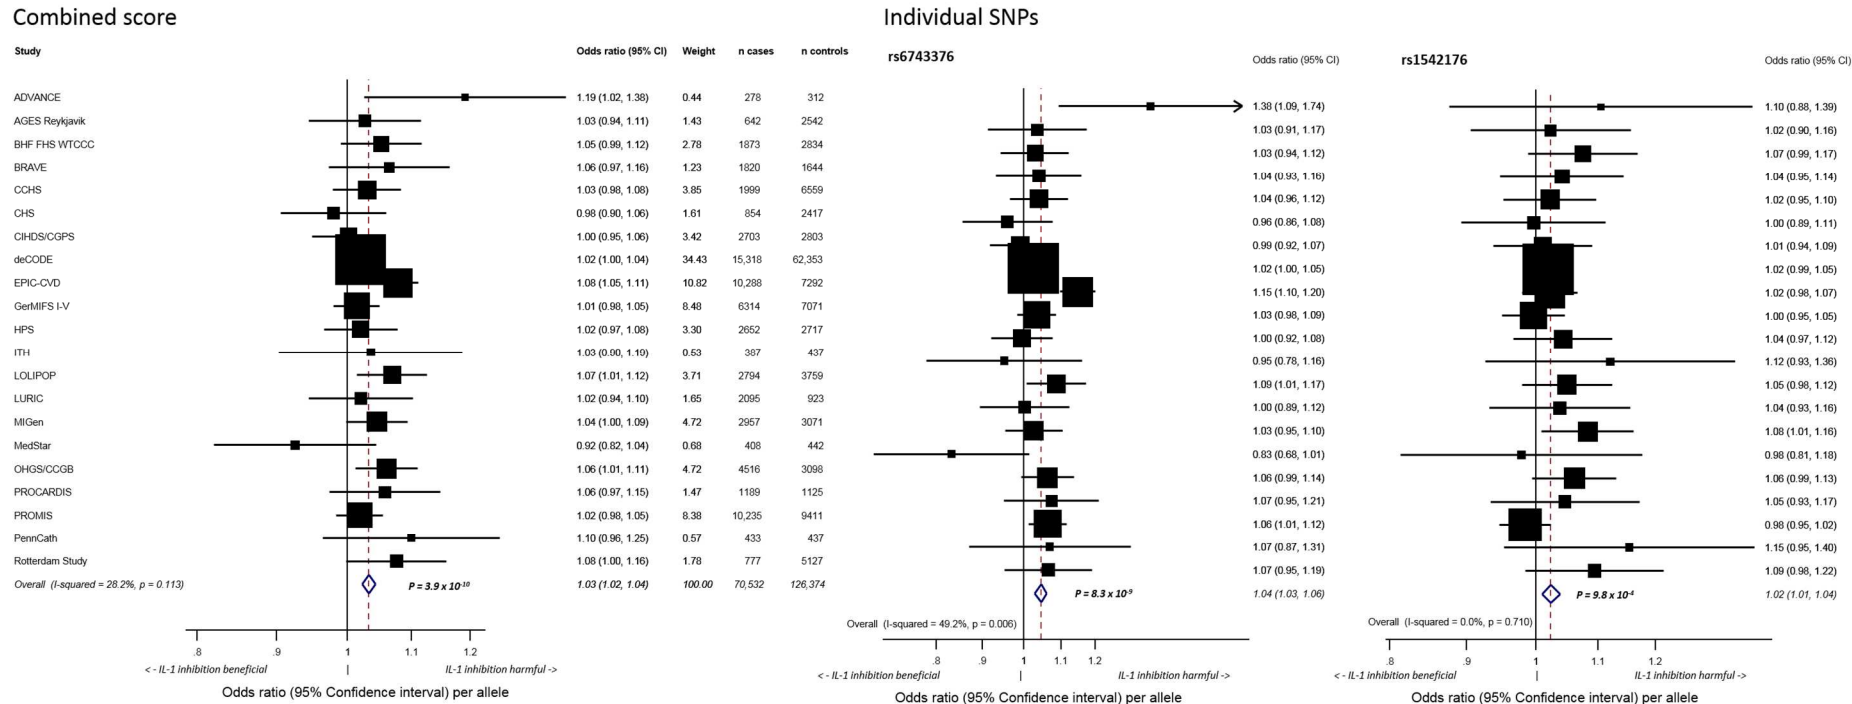

Blue diamonds reflect combined estimate from fixed effects inverse variance weighted meta-analysis. The overall estimate for the combined score analysis corresponds to the estimate provided for CHD in **Figure 3**. Analyses are based on tabular data on allele counts, using a per allele model. For rs6743376, between study heterogeneity is reduced considerably upon exclusion of the two small studies with the most extreme results (ADVANCE and MedStar,  $I^2=37.4\%$ ,  $P=0.05$ ), while the overall results remained unchanged (OR=1.04, 95% CI: 1.03-1.06). Details of the contributing studies are provided in **S-Table 9**.



**S-Figure 8: Relationship of the genetic score allele count with risk of CHD - individual study estimates**

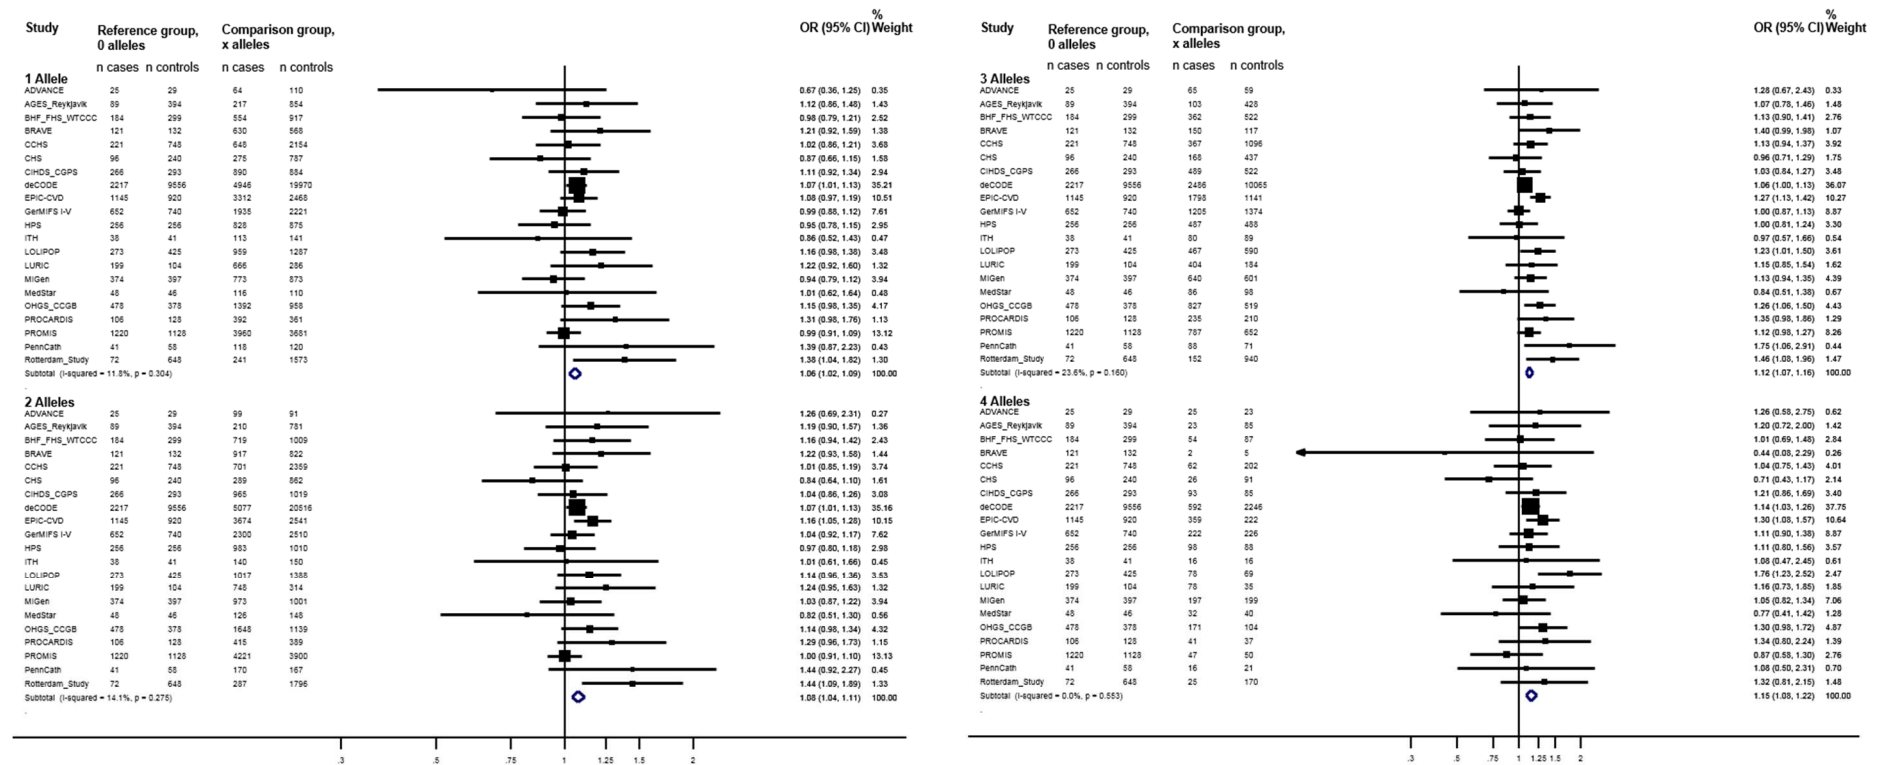

Blue diamonds reflect combined estimate from fixed effects inverse variance weighted meta-analysis. The overall estimate for each score category (1-4) corresponds to the estimates plotted in **Figure 4**. Details on studies contributing allele count data are provided in **S-Table 9**.

**S-Figure 9: Relationship of the genetic score allele count by type of CHD**

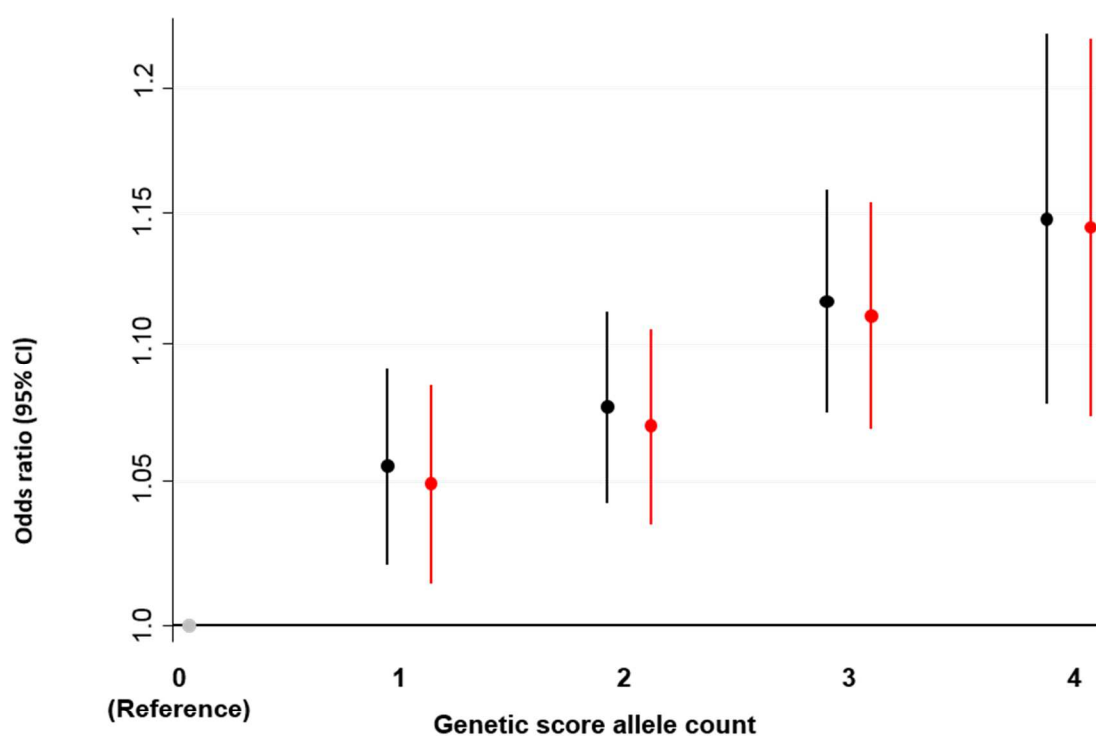

**All endpoints ●**

|            |        |        |        |        |      |
|------------|--------|--------|--------|--------|------|
| n cases    | 8121   | 23,029 | 25,679 | 11,446 | 2257 |
| n controls | 16,960 | 41,198 | 43,912 | 20,203 | 4101 |

**"Hard" CHD endpoints only ●**

|            |        |        |        |        |      |
|------------|--------|--------|--------|--------|------|
| n cases    | 7850   | 22,122 | 24,644 | 10,890 | 2154 |
| n controls | 16,208 | 39,339 | 41,802 | 19,079 | 3896 |

Details on studies contributing allele count data are provided in **S-Table 9**. Individual study estimates of the "all endpoints" analysis are provided in **S-Figure 8**. "Hard" CHD endpoints refer to studies that included predominantly CHD endpoints defined as myocardial infarction and other major acute coronary events. This analysis omitted results from studies that predominantly involved CHD endpoints defined by angiographic coronary stenosis.

# **S-Figure 10 Associations with rheumatoid arthritis, type 2 diabetes and abdominal aortic aneurysm of variants in alternative genetic score**

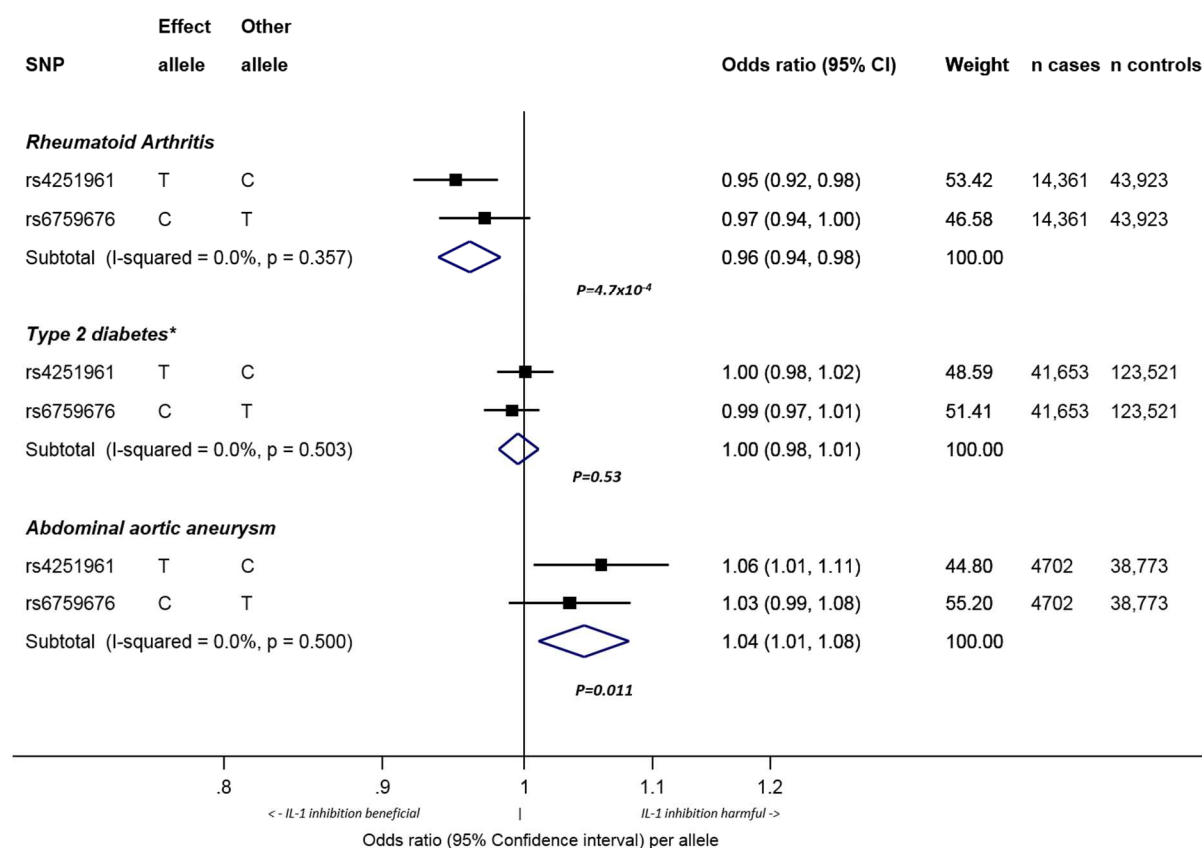

The alleles rs4251961[T] and rs6759676[C] are associated with higher IL-1Ra levels<sup>4</sup>.

\* Since the two SNPs are on the CardioMetabo array, the Type 2 diabetes analysis could capitalise on a bigger sample size than the primary score analyses.

## S-Figure 11: Associations with CHD of variants in alternative genetic score

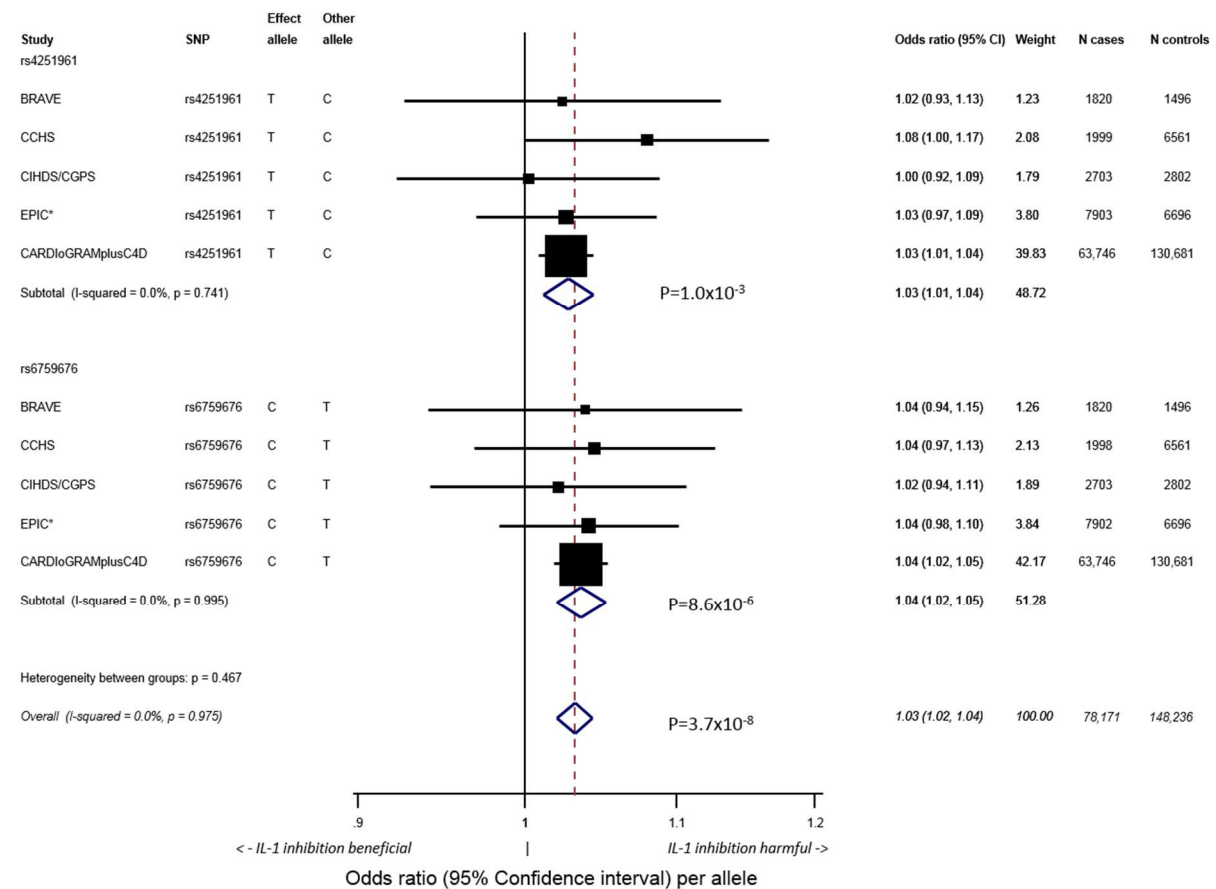

The alleles rs4251961[T] and rs6759676[C] are associated with higher IL-1Ra levels<sup>4</sup>. Individuals from the PROMIS study are included in the CARDIoGRAMplusC4D consortium. \*Individuals from EPIC Norfolk have been excluded, due to overlap with CARDIoGRAMplusC4D. Since the two SNPs are on the CardioMetabo array, the Type 2 diabetes analysis could capitalise on a bigger sample size than the primary score analyses.

## S-Figure 12: Individual and combined SNP associations with ischaemic stroke subtypes

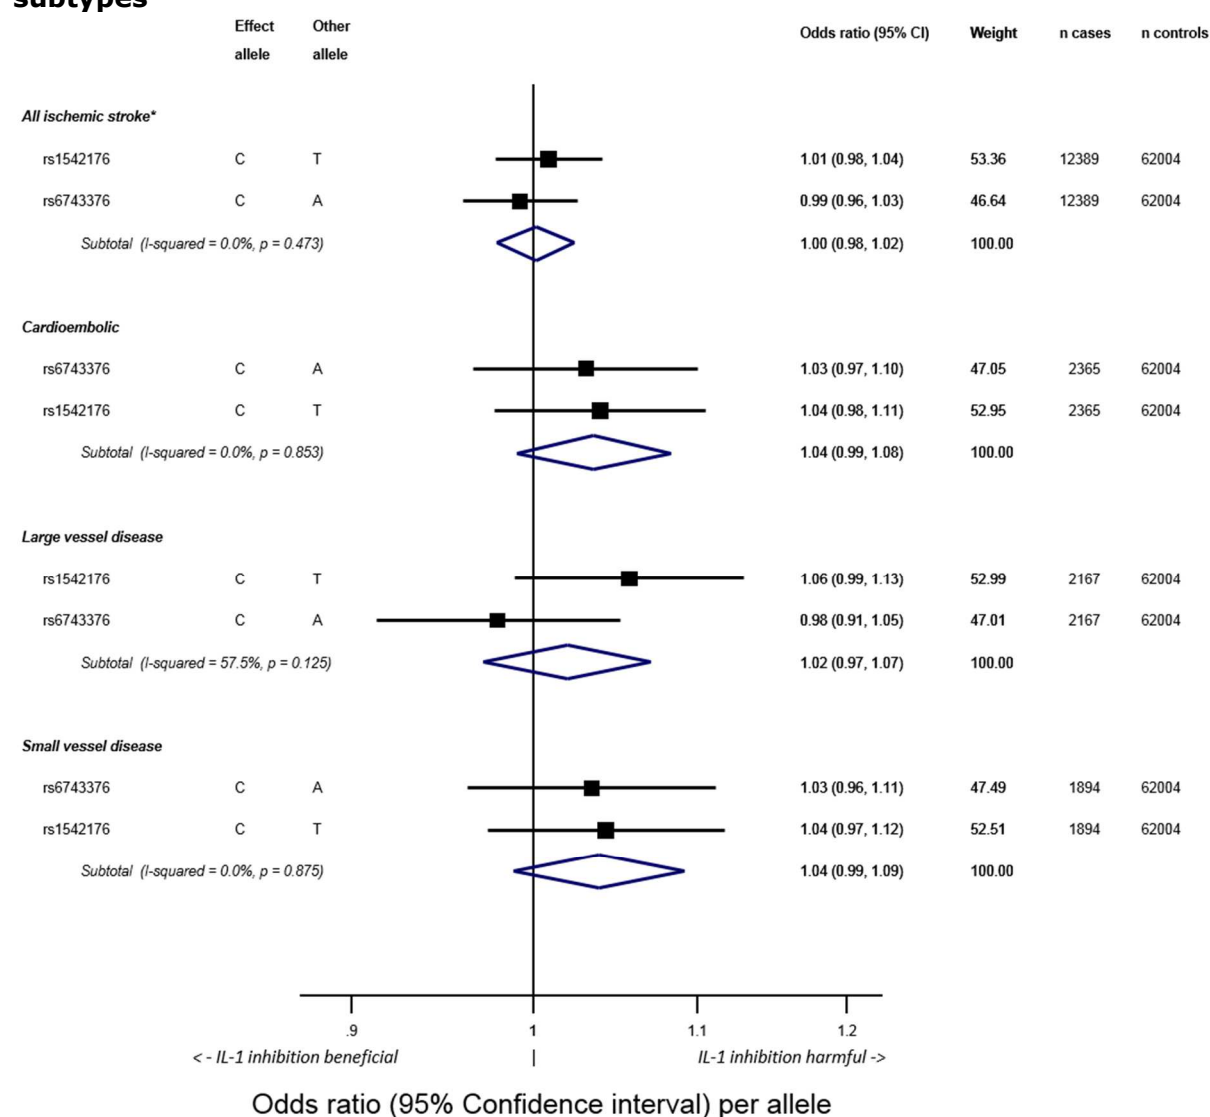

\* As stroke subtyping information was not available for all ischaemic stroke cases, the numbers of cases in the subtotals do not sum to equal the grand total of cases. Further details have been provided in **S-Tables 5 & 7**.

**S-Figure 13: Exploratory analysis of the genetic score with a range of cardiometabolic risk factors and biomarkers**

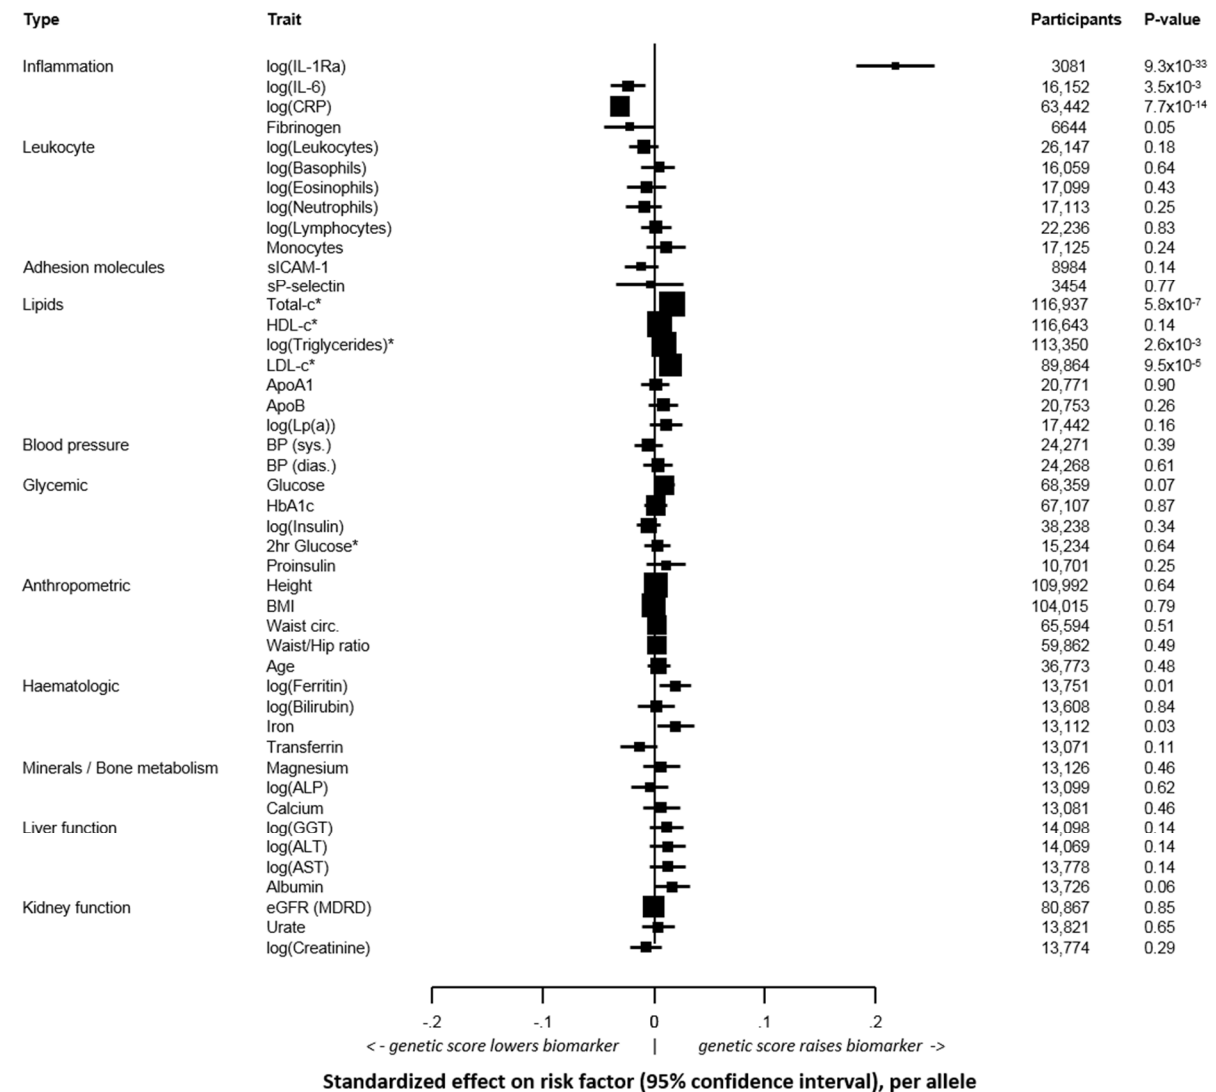

To enable comparison of the magnitude of associations across several different markers analyses were undertaken with standardised units of measurement for each marker. Associations are presented as per allele change in the biomarker expressed as standard deviations. Box sizes reflect number of participants contributing to analyses. \* contributing data include in part data on rs6761276[T] as proxy for rs6743376[C]. These analyses include data from studies with participant level data (**S-Table 2**) as well as summary data from consortia (**S-Table 8**).

# **S-Figure 14: Exploratory analysis of the genetic score with selected additional disease endpoints.**

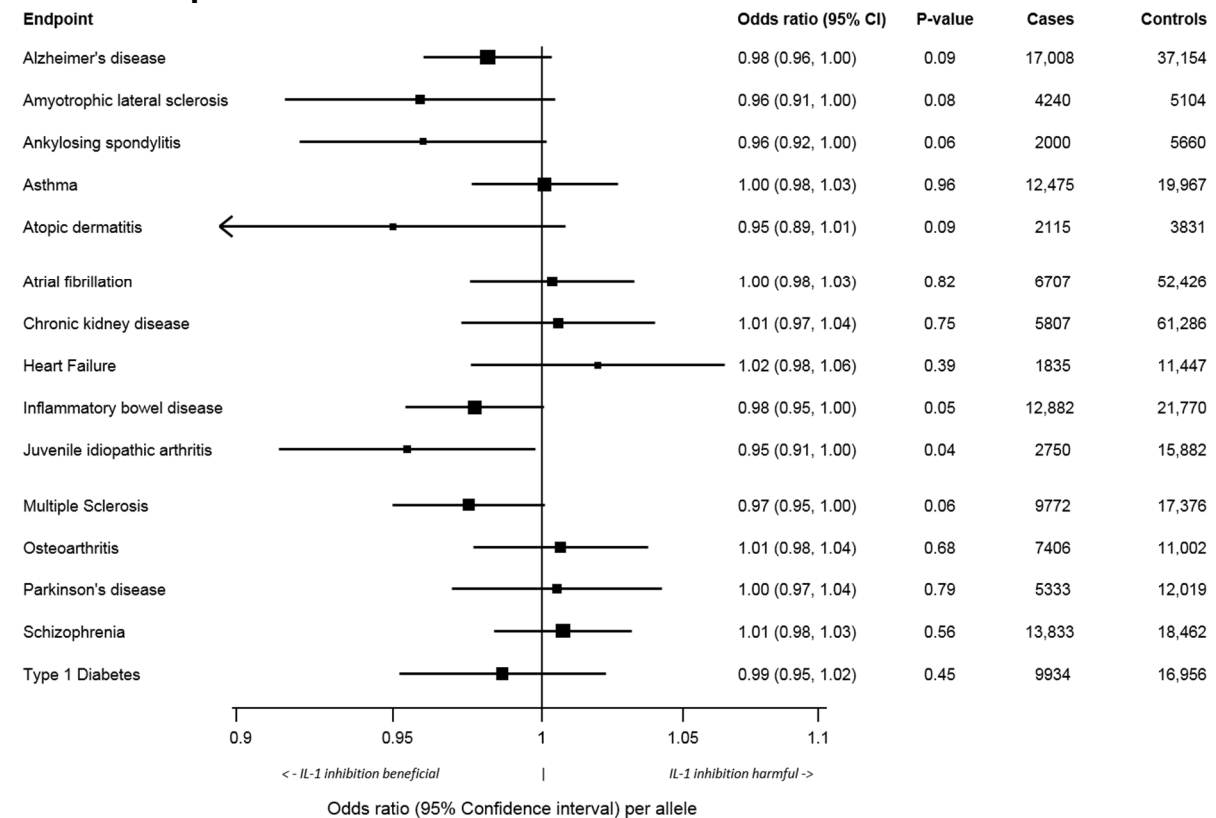

Box sizes reflect number of cases contributing to analyses. \* contributing data include rs6761276[T] as proxy for rs6743376[C]. Endpoint definitions have been provided in **S-Table 6**, and further details on methods in **S-Table 8**. Individual SNP results and meta-analysis are provided in **S-Figure 16**.

# **S-Figure 15: Exploratory analysis of the genetic score with disease endpoints potentially relevant to safety of IL-1 inhibition.**

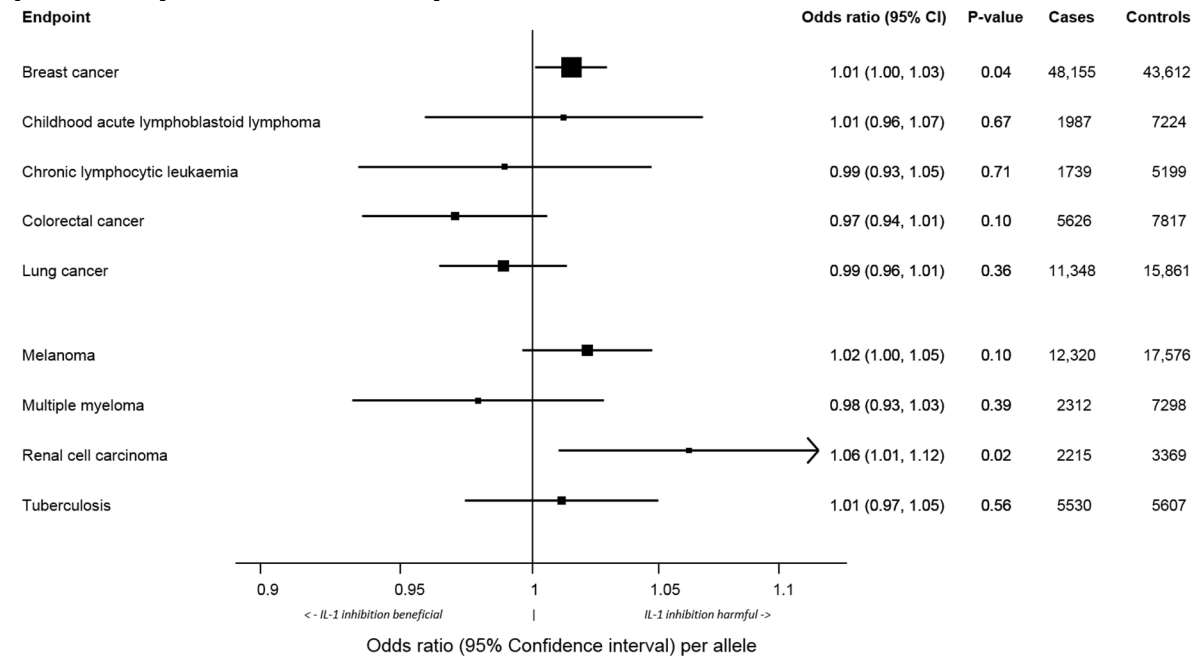

Box sizes reflect number of cases contributing to analyses. \* contributing data include rs6761276[T] as proxy for rs6743376[C]. Endpoint definitions have been provided in **S-Table 6**, and further details on methods in **S-Table 8**. Individual SNP results and meta-analysis are provided in **S-Figure 16**.



**S-Figure 16: Individual and combined SNP – disease endpoint associations**

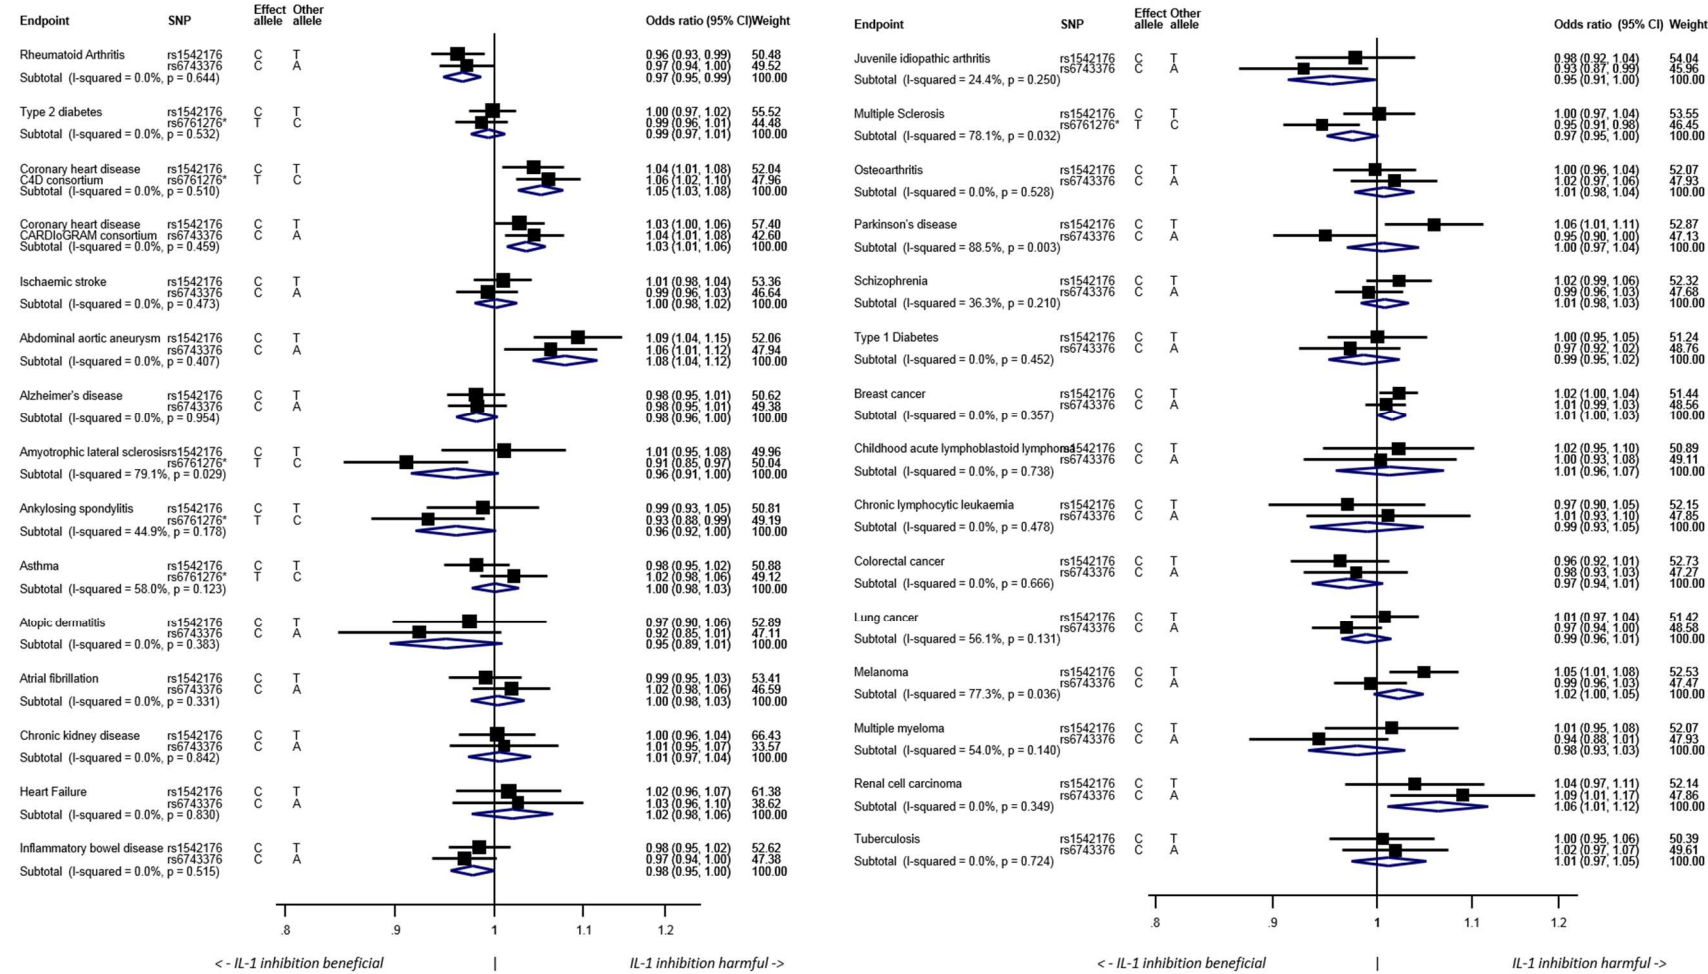

Odds ratio (95% Confidence interval) per allele

\*rs6761276[T] tags rs6743376[C],  $r^2=0.69$ ,  $D'=1.0$  and is the second strongest SNP for association with IL-1Ra levels. Blue diamonds reflect combined score estimate, derived from inverse variance weighted fixed-effect meta-analysis of individual SNP estimates. The combined score estimates correspond to those provided for each endpoint in **S-Figures 14 & 15**. Endpoint definitions have been provided in **S-Tables 5 & 6**, and further details on methods in **S-Tables 7 & 8**.

#### **4. Supplementary references**

- (1) Dinarello CA, Simon A, van der Meer JW. Treating inflammation by blocking interleukin-1 in a broad spectrum of diseases. *Nat Rev Drug Discov* 2012 August;11(8):633-52.
- (2) Matteini AM, Li J, Lange EM, Tanaka T, Lange LA, Tracy RP et al. Novel gene variants predict serum levels of the cytokines IL-18 and IL-1ra in older adults. *Cytokine* 2014 January;65(1):10-6.
- (3) Dastani Z, Hivert MF, Timpson N, Perry JR, Yuan X, Scott RA et al. Novel loci for adiponectin levels and their influence on type 2 diabetes and metabolic traits: a multi-ethnic meta-analysis of 45,891 individuals. *PLoS Genet* 2012;8(3):e1002607.
- (4) Herder C, Nuotio ML, Shah S, Blankenberg S, Brunner EJ, Carstensen M et al. Genetic determinants of circulating interleukin-1 receptor antagonist levels and their association with glycemic traits. *Diabetes* 2014 June 26.
- (5) Varbo A, Benn M, Tybjaerg-Hansen A, Jorgensen AB, Frikke-Schmidt R, Nordestgaard BG. Remnant cholesterol as a causal risk factor for ischemic heart disease. *J Am Coll Cardiol* 2013 January 29;61(4):427-36.
- (6) Nordestgaard BG, Benn M, Schnohr P, Tybjaerg-Hansen A. Nonfasting triglycerides and risk of myocardial infarction, ischemic heart disease, and death in men and women. *JAMA* 2007 July 18;298(3):299-308.
- (7) Kamstrup PR, Tybjaerg-Hansen A, Steffensen R, Nordestgaard BG. Genetically elevated lipoprotein(a) and increased risk of myocardial infarction. *JAMA* 2009 June 10;301(22):2331-9.
- (8) Riboli E, Hunt KJ, Slimani N, Ferrari P, Norat T, Fahey M et al. European Prospective Investigation into Cancer and Nutrition (EPIC): study populations and data collection. *Public Health Nutr* 2002 December;5(6B):1113-24.
- (9) Danesh J, Saracci R, Berglund G, Feskens E, Overvad K, Panico S et al. EPIC-Heart: the cardiovascular component of a prospective study of nutritional, lifestyle and biological factors in 520,000 middle-aged participants from 10 European countries. *Eur J Epidemiol* 2007;22(2):129-41.
- (10) Langenberg C, Sharp S, Forouhi NG, Franks PW, Schulze MB, Kerrison N et al. Design and cohort description of the InterAct Project: an examination of the interaction of genetic and lifestyle factors on the incidence of type 2 diabetes in the EPIC Study. *Diabetologia* 2011 September;54(9):2272-82.
- (11) Saleheen D, Zaidi M, Rasheed A, Ahmad U, Hakeem A, Murtaza M et al. The Pakistan Risk of Myocardial Infarction Study: a resource for the study of genetic, lifestyle and other determinants of myocardial infarction in South Asia. *Eur J Epidemiol* 2009;24(6):329-38.
- (12) Deloukas P, Kanoni S, Willenborg C, Farrall M, Assimes TL, Thompson JR et al. Large-scale association analysis identifies new risk loci for coronary artery disease. *Nat Genet* 2013 January;45(1):25-33.
- (13) Naitza S, Porcu E, Steri M, Taub DD, Mulas A, Xiao X et al. A genome-wide association scan on the levels of markers of inflammation in Sardinians reveals

associations that underpin its complex regulation. *PLoS Genet* 2012 January;8(1):e1002480.

- (14) Chene G, Thompson SG. Methods for summarizing the risk associations of quantitative variables in epidemiologic studies in a consistent form. *Am J Epidemiol* 1996 September 15;144(6):610-21.
- (15) Arnett FC, Edworthy SM, Bloch DA, McShane DJ, Fries JF, Cooper NS et al. The American Rheumatism Association 1987 revised criteria for the classification of rheumatoid arthritis. *Arthritis Rheum* 1988 March;31(3):315-24.
- (16) Voight BF, Scott LJ, Steinthorsdottir V, Morris AP, Dina C, Welch RP et al. Twelve type 2 diabetes susceptibility loci identified through large-scale association analysis. *Nat Genet* 2010 July;42(7):579-89.
- (17) A genome-wide association study in Europeans and South Asians identifies five new loci for coronary artery disease. *Nat Genet* 2011 April;43(4):339-44.
- (18) Schunkert H, König IR, Kathiresan S, Reilly MP, Assimes TL, Holm H et al. Large-scale association analysis identifies 13 new susceptibility loci for coronary artery disease. *Nat Genet* 2011 April;43(4):333-8.
- (19) Kettunen J, Tukiainen T, Sarin AP, Ortega-Alonso A, Tikkanen E, Lyytikäinen LP et al. Genome-wide association study identifies multiple loci influencing human serum metabolite levels. *Nat Genet* 2012 March;44(3):269-76.
- (20) Soininen P, Kangas AJ, Wurtz P, Tukiainen T, Tynkkynen T, Laatikainen R et al. High-throughput serum NMR metabolomics for cost-effective holistic studies on systemic metabolism. *Analyst* 2009 September;134(9):1781-5.
- (21) Shin SY, Fauman EB, Petersen AK, Krumsiek J, Santos R, Huang J et al. An atlas of genetic influences on human blood metabolites. *Nat Genet* 2014 June;46(6):543-50.
- (22) Bis JC, Kavousi M, Franceschini N, Isaacs A, Abecasis GR, Schminke U et al. Meta-analysis of genome-wide association studies from the CHARGE consortium identifies common variants associated with carotid intima media thickness and plaque. *Nat Genet* 2011 October;43(10):940-7.
- (23) Mitchell GF, Verwoert GC, Tarasov KV, Isaacs A, Smith AV, Yasmin et al. Common genetic variation in the 3'-BCL11B gene desert is associated with carotid-femoral pulse wave velocity and excess cardiovascular disease risk: the AortaGen Consortium. *Circ Cardiovasc Genet* 2012 February 1;5(1):81-90.
- (24) Orru V, Steri M, Sole G, Sidore C, Virdis F, Dei M et al. Genetic variants regulating immune cell levels in health and disease. *Cell* 2013 September 26;155(1):242-56.
- (25) Morris AP, Voight BF, Teslovich TM, Ferreira T, Segre AV, Steinthorsdottir V et al. Large-scale association analysis provides insights into the genetic architecture and pathophysiology of type 2 diabetes. *Nat Genet* 2012 September;44(9):981-90.
- (26) Burgess S, Butterworth A, Thompson SG. Mendelian randomization analysis with multiple genetic variants using summarized data. *Genet Epidemiol* 2013 November;37(7):658-65.

- (27) Di Angelantonio E, Sarwar N, Perry P, Kaptoge S, Ray KK, Thompson A et al. Major lipids, apolipoproteins, and risk of vascular disease. JAMA 2009 November 11;302(18):1993-2000.
- (28) Sarwar N, Sandhu MS, Ricketts SL, Butterworth AS, Di AE, Boekholdt SM et al. Triglyceride-mediated pathways and coronary disease: collaborative analysis of 101 studies. Lancet 2010 May 8;375(9726):1634-9.
- (29) Do R, Willer CJ, Schmidt EM, Sengupta S, Gao C, Peloso GM et al. Common variants associated with plasma triglycerides and risk for coronary artery disease. Nat Genet 2013 November;45(11):1345-52.

## **5. List of co-authors and affiliations**

Daniel F. Freitag PhD, Adam S. Butterworth PhD, Peter Willeit MD, Joanna M.M. Howson PhD, Stephen Burgess PhD, Stephen Kaptoge PhD, Robin Young PhD, Weang Kee Ho PhD, Angela M. Wood PhD, Michael Sweeting PhD, Sarah Spackman MMath, James R. Staley MSc, Anna Ramond DPharm, Eric Harshfield MPH, University of Cambridge, Cambridge, UK; Sune F. Nielsen PhD, Peer Grande MD, Copenhagen University Hospital, University of Copenhagen, Copenhagen, Denmark; Leslie A. Lange PhD, University of North Carolina, Chapel Hill, NC, USA; Matthew J. Bown FRCS, Department of Cardiovascular Sciences, University of Leicester and National Institute for Health Research Leicester Cardiovascular Biomedical Research Unit, Leicester, UK; Gregory T. Jones PhD, University of Otago, Dunedin, New Zealand; Robert A. Scott PhD, Medical Research Council Epidemiology Unit, Cambridge, UK; Steve Bevan PhD, University of Cambridge, Cambridge, UK; Eleonora Porcu PhD, Istituto di Ricerca Genetica e Biomedica (IRGB), Monserrato, Italy; Gudmar Thorleifsson PhD, deCODE Genetics/Amgen, Inc., Reykjavik, Iceland; Lingyao Zeng MSc, Thorsten Kessler MD, Deutsches Herzzentrum München, Technische Universität München, and German Centre for Cardiovascular Research (DZHK), partner site Munich Heart Alliance, all Munich, Germany; Majid Nikpay PhD, Ruddy Canadian Cardiovascular Genetics Centre, University of Ottawa Heart Institute, Ottawa, Canada; Ron Do PhD, Broad Institute, Cambridge and Massachusetts General Hospital, Boston, MA, USA; Weihua Zhang PhD, Imperial College, London, UK; Jemma C. Hopewell PhD, Clinical Trial Service Unit, University of Oxford, Oxford, UK; Marcus Kleber PhD, Vth Department of Medicine, Medical Faculty of Mannheim, University of Heidelberg, Germany; Graciela E. Delgado MSc, Vth Department of Medicine, Medical Faculty of Mannheim, University of Heidelberg, Germany; Christopher P. Nelson PhD, Department of Cardiovascular Sciences, University of Leicester and National Institute for Health Research Leicester Cardiovascular Biomedical Research Unit, Leicester, UK; Anuj Goel MSc, University of Oxford, Oxford, UK; Joshua C. Bis PhD, University of Washington, Seattle, WA, USA; Abbas Dehghan PhD, Symen Ligthart MD, Erasmus MC, University Medical Center Rotterdam, Rotterdam, The Netherlands; Albert V. Smith PhD, Icelandic Heart Association and University of Iceland, Iceland; Liming Qu MS, The Institute for Translational Medicine and Therapeutics and The Cardiovascular Institute, Perleman School of Medicine at the University of Pennsylvania, Philadelphia, PA, USA; Femke N.G. van 't Hof MD, Department of Neurology and Neurosurgery, Brain Center Rudolf Magnus, University Medical Center Utrecht, Utrecht, The Netherlands; Paul I.W. de Bakker PhD, Department of Medical Genetics, Center for Molecular Medicine and Department of Epidemiology, Julius Center for Health Sciences and Primary Care, University Medical Center Utrecht, Utrecht, The Netherlands; Annette F. Baas PhD, Department of Medical Genetics, Center

for Molecular Medicine, University Medical Center Utrecht, Utrecht, The Netherlands; Andre van Rij FRACS, University of Otago, Dunedin, New Zealand; Gerard Tromp PhD, Helena Kuivaniemi MD PhD, The Sigfried and Janet Weis Center for Research, Geisinger Health System, Danville, PA, USA; Marylyn D. Ritchie PhD, Shefali S. Verma MS, The Pennsylvania State University, University Park, PA, USA; Dana C. Crawford PhD, Case Western Reserve University, Cleveland, Ohio, USA; Jennifer Malinowski PhD, Yale University, New Haven CT, USA; Mariza de Andrade PhD, Mayo Clinic Rochester, MN, USA; Iftikhar J. Kullo MD, Mayo Clinic Rochester, MN, USA; Peggy L. Peissig PhD, Marshfield Clinic Research Foundation, Marshfield, Wisconsin, USA; Catherine A. McCarty PhD, Research Division Essentia Institute of Rural Health, Duluth, MN, USA; Erwin P. Böttinger MD, Omri Gottesman MD, Icahn School of Medicine Mount Sinai, New York, NY, USA; David R. Crosslin PhD, University of Washington Seattle, WA, USA; David S. Carrell PhD, Group Health Research Institute Seattle, WA, USA; Laura J. Rasmussen-Torvik PhD, Jennifer A. Pacheco BA, Northwestern University Feinberg School of Medicine Chicago, IL, USA; The EPIC-CVD consortium; The Aneurysm Consortium; the eMERGE Network; Jie Huang MD, Wellcome Trust Sanger Institute, Hinxton, UK; Nicholas J. Timpson PhD, The MRC Integrative Epidemiology Unit, University of Bristol, Bristol, UK; the UK 10K consortium; The EPIC-InterAct consortium; METASTROKE consortium; Johannes Kettunen PhD, University of Oulu, Oulu and National Institute for Health and Welfare, Helsinki, Finland; Mika Ala-Korpela PhD, University of Oulu, Oulu, Finland and University of Bristol, Bristol, UK; Gary F. Mitchell MD, Cardiovascular Engineering Inc., Norwood, MA, USA; Afshin Parsa MD, University of Maryland School of Medicine, Baltimore, MD, USA; Ian B. Wilkinson FRCP, University of Cambridge, Cambridge, UK; Mathias Gorski Dipl.-Inf., University of Regensburg, Regensburg, Germany; Yong Li MD, University Hospital Freiburg, Freiburg, Germany; CKDGen Consortium; Nora Franceschini MD, University of North Carolina, Chapel Hill, NC, USA; Margaux F. Keller PhD, National Institute on Aging, National Institutes of Health, Bethesda, MD, USA; Santhi K. Ganesh MD, University of Michigan, Ann Arbor, MI, USA; CHARGE Haematology working group; Carl D. Langefeld PhD, Wake Forest School of Medicine, Winston-Salem, NC, USA; Lucie Bruijn PhD, The ALS association, Washington, DC, USA; Matthew A Brown MD, University of Queensland Diamantina Institute, Brisbane, Australia; David M Evans PhD, University of Queensland Diamantina Institute, Translational Research Institute, Princess Alexandra Hospital, Brisbane, Australia; Australo-Anglo-American Spondyloarthritis Consortium; Svetlana Baltic PhD, Lung Institute of Western Australia, University of Western Australia, Perth, WA, Australia; Manuel A Ferreira PhD, QIMR-Berghofer Medical Research Institute, Brisbane, QLD, Australia; Australian Asthma Genetics Consortium; Hansjörg Baurecht MSc, Stephan Weidinger MD, Department of Dermatology, Allergology, and Venereology, University Hospital Schleswig-Holstein, Kiel, Germany; Andre Franke PhD, Christian-

Albrechts-University of Kiel, Kiel, Germany; Steven A. Lubitz MD MPH, Massachusetts General Hospital, Boston, MA, USA; Martina Müller-Nurasyid PhD, Institute of Genetic Epidemiology, Helmholtz Zentrum München - German Research Center for Environmental Health, Neuherberg, Germany, Department of Medicine I, Ludwig-Maximilians-University Munich, Munich, Germany, DZHK (German Centre for Cardiovascular Research), partner site Munich Heart Alliance, Munich, Germany; AFGen Consortium; Janine F. Felix MD PhD, Erasmus MC, University Medical Center Rotterdam, the Netherlands; Nicholas L. Smith PhD, University of Washington, Seattle, WA, USA; CHARGE Heart Failure working group; Marc Sudman BA, Susan D. Thompson PhD, Cincinnati Children's Hospital Medical Center, Cincinnati, OH, USA; Consortium for Juvenile Arthritis Genetics; Eleftheria Zeggini PhD, Kalliope Panoutsopoulou PhD, Wellcome Trust Sanger Institute, Hinxton, UK; the arcOGEN consortium; Mike A. Nalls PhD, Andrew Singleton PhD, National Institute on Aging, National Institutes of Health, Bethesda, MD, USA; International Parkinson's Disease Consortium; Constantin Polychronakos MD, McGill University Health Centre, Montreal, QC, Canada; Jonathan P Bradfield PhD, Hakon Hakonarson MD, The Children's Hospital Philadelphia, Philadelphia, Pennsylvania, USA; Douglas F Easton PhD, Deborah Thompson PhD, University of Cambridge, Cambridge, UK.; Breast Cancer Association Consortium; Ian P. Tomlinson MD, Wellcome Trust Centre for Human Genetics, Oxford, UK; Malcolm Dunlop FMedSci, University of Edinburgh and MRC Human Genetics Unit, Edinburgh, UK; Kari Hemminki MD, German Cancer Research Centre, Heidelberg, Germany and Lund University, Malmö, Sweden; Gareth Morgan FRCP University of Arkansas for Medical Sciences, Little Rock, AR, USA; Timothy Eisen FRCP Cambridge University Health Partners, Cambridge, UK; Hartmut Goldschmidt MD Med. Clinic V, University Heidelberg and National Center for Tumor Diseases, Heidelberg, Germany; James M. Allan PhD Northern Institute for Cancer Research, Newcastle University, Newcastle upon Tyne, United Kingdom; Marc Henrion PhD Division of Genetics and Epidemiology, The Institute of Cancer Research, Sutton, UK; Nicola Whiffin MA Division of Genetics and Epidemiology, The Institute of Cancer Research, Sutton, UK; Yufei Wang PhD Division of Genetics and Epidemiology, The Institute of Cancer Research, Sutton, UK; Daniel Chubb PhD Division of Genetics and Epidemiology, The Institute of Cancer Research, Sutton, UK; Richard S. Houlston FMedSci, Institute of cancer research, London, UK; Mark M. Iles PhD, D. Timothy Bishop PhD, Leeds Cancer Research UK Centre, University of Leeds, Leeds, UK; Matthew H. Law PhD, Nicholas K. Hayward PhD, QIMR Berghofer Medical Research Institute, Brisbane, QLD, Australia; GenoMEL consortium; Yang Luo PhD, Wellcome Trust Sanger Institute, Hinxton, UK; Sergey Nejentsev MD, Department of Medicine, University of Cambridge, Cambridge, UK; Maja Barbalic PhD, Human Genetics Center, University of Texas Health Science Center, Houston, TX, USA ; CHARGE inflammation working group; David Crossman

FRCP, University of St Andrews, St Andrews, UK; Serena Sanna PhD, Istituto di Ricerca Genetica e Biomedica (IRGB), Monserrato, Italy; Nicole Soranzo PhD, Wellcome Trust Sanger Institute, Hinxton, UK; Hugh S Markus FRCP, University of Cambridge, Cambridge, UK; Nicholas J. Wareham FRCP, Medical Research Council Epidemiology Unit, Cambridge, UK; Daniel J. Rader MD, Muredach Reilly MD, The Institute for Translational Medicine and Therapeutics and The Cardiovascular Institute, Perleman School of Medicine at the University of Pennsylvania, Philadelphia, PA, USA; Themistocles Assimes MD, Stanford University School of Medicine, Stanford University, Stanford, CA, USA; Tamara B. Harris MD, Laboratory of Epidemiology and Population Sciences, National Institute on Aging, Bethesda, MD, USA; Albert Hofman MD, Oscar H. Franco MD, Erasmus MC, University Medical Center Rotterdam, Rotterdam, The Netherlands; Vilmundur Gudnason MD, Icelandic Heart Association and University of Iceland, Iceland; Russell Tracy PhD, University of Vermont College of Medicine, Burlington, VT, US; Bruce M. Psaty MD, University of Washington, Seattle, WA, US; Martin Farrall PhD, University of Oxford, Oxford, UK; Hugh Watkins FMedSci, University of Oxford, Oxford, UK; Alistair S. Hall FRCP, Leeds Institute of Genetics, Health and Therapeutics, University of Leeds, Leeds, UK; Nilesh J. Samani FRCP, Department of Cardiovascular Sciences, University of Leicester and National Institute for Health Research Leicester Cardiovascular Biomedical Research Unit, Leicester, UK; Winfried März MD, Synlab Academy, Synlab Services GmbH, Mannheim, Germany; Robert Clarke FRCP, Clinical Trial Service Unit, University of Oxford, Oxford, UK; Rory Collins FMedSci, Clinical Trial Service Unit, University of Oxford, Oxford, UK; Jaspal S. Kooner FRCP, National Heart and Lung Institute, Imperial College London, UK; John C. Chambers PhD, Imperial College, London, UK; Myocardial Infarction Genetics Consortium; Sekar Kathiresan MD, Broad Institute, Cambridge and Massachusetts General Hospital, Boston, MA, USA; Ruth McPherson FRCP(C), Ruddy Canadian Cardiovascular Genetics Centre, University of Ottawa Heart Institute, Ottawa, Canada; Jeanette Erdmann PhD, Institute for Integrative and Experimental Genomics, University of Lübeck and DZHK (German Research Centre for Cardiovascular Research), Lübeck, Germany; Adnan Kastrati MD, Heribert Schunkert MD, Deutsches Herzzentrum München, Technische Universität München, and German Centre for Cardiovascular Research (DZHK), partner site Munich Heart Alliance, all Munich, Germany; Kári Stefánsson MD, Unnur Thorsteinsdóttir PhD, deCODE Genetics/Amgen, Inc., and Faculty of Medicine, University of Iceland, Reykjavik, Iceland; Jeremy D. Walston MD, Johns Hopkins University School of Medicine, Baltimore, MD, USA; Anne Tybjærg-Hansen MD, Copenhagen University Hospital, University of Copenhagen, Copenhagen, Denmark; Dewan S. Alam PhD, Centre for Control of Chronic Diseases, icDDR, Dhaka, Bangladesh; A.A.S. Majumder FRCP, National Institute of Cardiovascular Diseases, Dhaka, Bangladesh; Emanuele Di Angelantonio MD, Rajiv Chowdhury MD, University of



Cambridge, Cambridge, UK; Børge G. Nordestgaard MD, Copenhagen University Hospital, University of Copenhagen, Copenhagen, Denmark; Danish Saleheen MD, University of Pennsylvania, Philadelphia, USA, and University of Cambridge, Cambridge, UK; Simon G. Thompson FMedSci, John Danesh FRCP, University of Cambridge, Cambridge, UK.

## **6. List of collaborators by consortia**

**The UK10K consortium:** Al Turki, Saeed The Wellcome Trust Sanger Institute, Wellcome Trust Genome Campus, Hinxton CB10 1HH, Cambridge, UK. Department of Pathology, King Abdulaziz Medical City, Riyadh, Saudi Arabia. ; Anderson, Carl The Wellcome Trust Sanger Institute, Wellcome Trust Genome Campus, Hinxton CB10 1HH, Cambridge, UK. ; Anney, Richard Department of Psychiatry, Trinity Centre for Health Sciences, St. James Hospital, James's Street, Dublin 8, Ireland. ; Antony, Dinu Genetics and Genomic Medicine and Birth Defects Research Centre, UCL Institute of Child Health, London, WC1N 1EH, UK. ; Ayub, Muhammad Division of Developmental Disabilities, Department of Psychiatry, Queen's University, Kingston, Canada ; Balasubramaniam, Senduran The Wellcome Trust Sanger Institute, Wellcome Trust Genome Campus, Hinxton CB10 1HH, Cambridge, UK. ; Barrett, Jeffrey C The Wellcome Trust Sanger Institute, Wellcome Trust Genome Campus, Hinxton CB10 1HH, Cambridge, UK. ; Barroso, Inês The Wellcome Trust Sanger Institute, Wellcome Trust Genome Campus, Hinxton CB10 1HH, Cambridge, UK. University of Cambridge Metabolic Research Laboratories, and NIHR Cambridge Biomedical Research Centre, Wellcome Trust-MRC Institute of Metabolic Science, Addenbrooke's Hospital, Cambridge, CB2 0QQ, UK. ; Beales, Phil Genetics and Genomic Medicine and Birth Defects Research Centre, UCL Institute of Child Health, London, WC1N 1EH, UK ; Bentham, Jamie Department of Cardiovascular Medicine and Wellcome Trust Centre for Human Genetics, Roosevelt Drive, Oxford, OX3 7BN, UK. ; Bhattacharya, Shoumo Department of Cardiovascular Medicine and Wellcome Trust Centre for Human Genetics, Roosevelt Drive, Oxford, OX3 7BN, UK ; Birney, Ewan European Molecular Biology Laboratory, European Bioinformatics Institute, Wellcome Trust Genome Campus, Hinxton, Cambridge CB10 1SD, UK. ; Blackwood, Douglas Division of Psychiatry, The University of Edinburgh, Royal Edinburgh Hospital, Edinburgh, EH10 5HF, UK. ; Bobrow, Martin Department of Medical Genetics, Cambridge Institute for Medical Research, University of Cambridge, CB2 0XY, UK. ; Bochukova, Elena University of Cambridge Metabolic Research Laboratories, and NIHR Cambridge Biomedical Research Centre, Wellcome Trust-MRC Institute of Metabolic Science, Addenbrooke's Hospital, Cambridge, CB2 0QQ, UK. ; Bolton, Patrick Institute of Psychiatry, Kings College London, 16 De Crespigny Park, London SE5 8AF, UK. ; Bounds, Rebecca University of Cambridge Metabolic Research Laboratories, and NIHR Cambridge Biomedical Research Centre, Wellcome Trust-MRC Institute of Metabolic Science, Addenbrooke's Hospital, Cambridge, CB2 0QQ, UK. ; Boustred, Chris MRC Integrative Epidemiology Unit, School of Social and Community Medicine, University of Bristol, Oakfield House, Oakfield Grove, Clifton, Bristol, BS8 2BN, UK. ; Breen, Gerome Institute of Psychiatry, Kings College London, 16 De Crespigny Park, London SE5 8AF, UK. NIHR BRC for Mental Health, Institute of Psychiatry and SLaM NHS Trust, King's College

London, 16 De Crespigny Park, London SE5 8AF, UK. ; Brion, Marie-Jo MRC Integrative Epidemiology Unit, School of Social and Community Medicine, University of Bristol, Oakfield House, Oakfield Grove, Clifton, Bristol, BS8 2BN, UK. ; Calissano, Mattia Dubowitz Neuromuscular Centre, UCL Institute of Child Health & Great Ormond Street Hospital, London, WC1N 1EH, UK. ; Carss, Keren The Wellcome Trust Sanger Institute, Wellcome Trust Genome Campus, Hinxton CB10 1HH, Cambridge, UK. ; Chatterjee, Krishna University of Cambridge Metabolic Research Laboratories, and NIHR Cambridge Biomedical Research Centre, Wellcome Trust-MRC Institute of Metabolic Science, Addenbrooke's Hospital, Cambridge, CB2 0QQ, UK. ; Chen, Lu The Wellcome Trust Sanger Institute, Wellcome Trust Genome Campus, Hinxton CB10 1HH, Cambridge, UK. Department of Haematology, University of Cambridge, Long Road, Cambridge CB2 0PT, UK. ; Ciampi, Antonio Department of Epidemiology, Biostatistics and Occupational Health, McGill University, Montreal, Quebec, Canada ; Cirak, Sebhaddin Dubowitz Neuromuscular Centre, UCL Institute of Child Health & Great Ormond Street Hospital, London, WC1N 1EH, UK. ; ; Institut für Humangenetik, Uniklinik Köln, Kerpener Str. 34, 50931 Köln, Germany. ; Clapham, Peter The Wellcome Trust Sanger Institute, Wellcome Trust Genome Campus, Hinxton CB10 1HH, Cambridge, UK. ; Clement, Gail The Department of Twin Research & Genetic Epidemiology, King's College London, St Thomas' Campus, Lambeth Palace Road, London, SE1 7EH, UK. ; Coates, Guy The Wellcome Trust Sanger Institute, Wellcome Trust Genome Campus, Hinxton CB10 1HH, Cambridge, UK. ; Collier, David Social, Genetic and Developmental Psychiatry Centre, Institute of Psychiatry, King's College London, Denmark Hill, London, SE5 8AF, UK. Lilly Research Laboratories, Eli Lilly & Co. Ltd., Erl Wood Manor, Sunninghill Road, Windlesham, Surrey, UK. ; Cosgrove, Catherine Department of Cardiovascular Medicine and Wellcome Trust Centre for Human Genetics, Roosevelt Drive, Oxford, OX3 7BN, UK. ; Cox, Tony The Wellcome Trust Sanger Institute, Wellcome Trust Genome Campus, Hinxton CB10 1HH, Cambridge, UK. ; Craddock, Nick MRC Centre for Neuropsychiatric Genetics & Genomics, Institute of Psychological Medicine & Clinical Neurosciences, School of Medicine, Cardiff University, Cardiff, CF14 4XN. ; Crooks, Lucy The Wellcome Trust Sanger Institute, Wellcome Trust Genome Campus, Hinxton CB10 1HH, Cambridge, UK. Sheffield Diagnostic Genetics Service, Sheffield Childrens' NHS Foundation Trust, Western Bank, Sheffield S10 2TH, UK. ; Curran, Sarah Institute of Psychiatry, Kings College London, 16 De Crespigny Park, London SE5 8AF, UK. University of Sussex, Brighton BN1 9RH, UK. Sussex Partnership NHS Foundation Trust, Swandean, Arundel Road, Worthing, West Sussex, BN13 3EP, UK ; Curtis, David University College London (UCL), Molecular Psychiatry Laboratory, Division of Psychiatry, Gower Street, London WC1E 6BT, UK. ; Daly, Allan The Wellcome Trust Sanger Institute, Wellcome Trust Genome Campus, Hinxton CB10 1HH, Cambridge, UK. ; Danecek, Petr The

Wellcome Trust Sanger Institute, Wellcome Trust Genome Campus, Hinxton CB10 1HH, Cambridge, UK. ; Davey Smith, George MRC Integrative Epidemiology Unit, School of Social and Community Medicine, University of Bristol, Oakfield House, Oakfield Grove, Clifton, Bristol, BS8 2BN, UK. ; Day-Williams, Aaron The Wellcome Trust Sanger Institute, Wellcome Trust Genome Campus, Hinxton CB10 1HH, Cambridge, UK. Computational Biology & Genomics, Biogen Idec, 14 Cambridge Center, Cambridge, MA02142, USA. ; Day, Ian N. M. MRC Integrative Epidemiology Unit, School of Social and Community Medicine, University of Bristol, Oakfield House, Oakfield Grove, Clifton, Bristol, BS8 2BN, UK. ; Down, Thomas The Wellcome Trust Sanger Institute, Wellcome Trust Genome Campus, Hinxton CB10 1HH, Cambridge, UK. Department of Medical and Molecular Genetics, Division of Genetics and Molecular Medicine, King's College London School of Medicine, Guy's Hospital, London SE1 9RT, UK. ; Du, Yuanping BGI-Shenzhen, Shenzhen 518083, China. ; Dunham, Ian European Molecular Biology Laboratory, European Bioinformatics Institute, Wellcome Trust Genome Campus, Hinxton, Cambridge CB10 1SD, UK. ; Durbin, Richard The Wellcome Trust Sanger Institute, Wellcome Trust Genome Campus, Hinxton CB10 1HH, Cambridge, UK. ; Edkins, Sarah The Wellcome Trust Sanger Institute, Wellcome Trust Genome Campus, Hinxton CB10 1HH, Cambridge, UK. ; Ellis, Peter The Wellcome Trust Sanger Institute, Wellcome Trust Genome Campus, Hinxton CB10 1HH, Cambridge, UK. ; Evans, David MRC Integrative Epidemiology Unit, School of Social and Community Medicine, University of Bristol, Oakfield House, Oakfield Grove, Clifton, Bristol, BS8 2BN, UK. University of Queensland Diamantina Institute, Translational Research Institute, Brisbane, Queensland, Australia ; Faroogi, Sadaf University of Cambridge Metabolic Research Laboratories, and NIHR Cambridge Biomedical Research Centre, Wellcome Trust-MRC Institute of Metabolic Science, Addenbrooke's Hospital, Cambridge, CB2 0QQ, UK. ; Fatemifar, Ghazaleh MRC Integrative Epidemiology Unit, School of Social and Community Medicine, University of Bristol, Oakfield House, Oakfield Grove, Clifton, Bristol, BS8 2BN, UK. ; Fitzpatrick, David R MRC Human Genetics Unit, MRC Institute of Genetics and Molecular Medicine, at the University of Edinburgh, Western General Hospital, Edinburgh, EH4 2XU, UK. ; Flicek, Paul The Wellcome Trust Sanger Institute, Wellcome Trust Genome Campus, Hinxton CB10 1HH, Cambridge, UK. European Molecular Biology Laboratory, European Bioinformatics Institute, Wellcome Trust Genome Campus, Hinxton, Cambridge CB10 1SD, UK. ; Floyd, James The Wellcome Trust Sanger Institute, Wellcome Trust Genome Campus, Hinxton CB10 1HH, Cambridge, UK. The Genome Centre, John Vane Science Centre, Queen Mary, University of London, Charterhouse Square, London EC1M 6BQ, UK. ; Foley, A. Reghan Dubowitz Neuromuscular Centre, UCL Institute of Child Health & Great Ormond Street Hospital, London, WC1N 1EH, UK. ; Franklin, Christopher S The Wellcome Trust Sanger Institute, Wellcome Trust Genome Campus, Hinxton CB10 1HH,

Cambridge, UK. ; Futema, Marta Cardiovascular Genetics, BHF Laboratories, Rayne Building, Institute Cardiovascular Sciences, University College London, London WC1E 6JJ, UK. ; Gallagher, Louise Department of Psychiatry, Trinity Centre for Health Sciences, St. James Hospital, James's Street, Dublin 8, Ireland. ; Gaunt, Tom MRC Integrative Epidemiology Unit, School of Social and Community Medicine, University of Bristol, Oakfield House, Oakfield Grove, Clifton, Bristol, BS8 2BN, UK. ; Geihs, Matthias The Wellcome Trust Sanger Institute, Wellcome Trust Genome Campus, Hinxton CB10 1HH, Cambridge, UK ; Geschwind, Daniel UCLA David Geffen School of Medicine, Los Angeles, California, USA. ; Greenwood, Celia Lady Davis Institute, Jewish General Hospital, Montreal, Quebec, Canada. Department of Epidemiology, Biostatistics and Occupational Health, McGill University, Montreal, Quebec, Canada Departments of Medicine & Human Genetics, McGill University, Montreal, Quebec, Canada. Department of Oncology, McGill University, Montreal, Quebec, Canada. ; Griffin, Heather HeLEX – Centre for Health, Law and Emerging Technologies, Department of Public Health, University of Oxford, Old Road Campus, Oxford, OX3 7LF, UK. ; Grozeva, Detelina Department of Medical Genetics, Cambridge Institute for Medical Research, University of Cambridge, CB2 0XY, UK. ; Guo, Xiaosen BGI-Shenzhen, Shenzhen 518083, China. Department of Biology, University of Copenhagen, Ole Maaløes Vej 5, 2200 Copenhagen, Denmark. ; Guo, Xueqin BGI-Shenzhen, Shenzhen 518083, China. ; Gurling, Hugh University College London (UCL), Molecular Psychiatry Laboratory, Division of Psychiatry, Gower Street, London WC1E 6BT, UK. ; Hart, Deborah The Department of Twin Research & Genetic Epidemiology, King's College London, St Thomas' Campus, Lambeth Palace Road, London, SE1 7EH, UK. ; Hendricks, Audrey The Wellcome Trust Sanger Institute, Wellcome Trust Genome Campus, Hinxton CB10 1HH, Cambridge, UK. Department of Mathematical and Statistical Sciences, University of Colorado, Denver CO 80202, USA. ; Holmans, Peter MRC Centre for Neuropsychiatric Genetics & Genomics, Institute of Psychological Medicine & Clinical Neurosciences, School of Medicine, Cardiff University, Cardiff, CF14 4XN. ; Howie, Bryan Adaptive Biotechnologies Corporation, Seattle, WA, USA. ; Huang, Jie The Wellcome Trust Sanger Institute, Wellcome Trust Genome Campus, Hinxton CB10 1HH, Cambridge, UK. ; Huang, Liren BGI-Shenzhen, Shenzhen 518083, China. ; Hubbard, Tim The Wellcome Trust Sanger Institute, Wellcome Trust Genome Campus, Hinxton CB10 1HH, Cambridge, UK. Department of Medical and Molecular Genetics, Division of Genetics and Molecular Medicine, King's College London School of Medicine, Guy's Hospital, London SE1 9RT, UK. ; Humphries, Steve E Cardiovascular Genetics, BHF Laboratories, Rayne Building, Institute Cardiovascular Sciences, University College London, London WC1E 6JJ, UK. ; Hurles, Matthew E The Wellcome Trust Sanger Institute, Wellcome Trust Genome Campus, Hinxton CB10 1HH, Cambridge, UK. ; Hysi, Pirro The Department of Twin Research & Genetic Epidemiology, King's College London,

St Thomas' Campus, Lambeth Palace Road, London, SE1 7EH, UK. ; Jackson, David K. The Wellcome Trust Sanger Institute, Wellcome Trust Genome Campus, Hinxton CB10 1HH, Cambridge, UK. ; Jamshidi, Yalda Human Genetics Research Centre, St George's University of London, UK. ; Joyce, Chris The Wellcome Trust Sanger Institute, Wellcome Trust Genome Campus, Hinxton CB10 1HH, Cambridge, UK. ; Kaye, Jane HeLEX – Centre for Health, Law and Emerging Technologies, Department of Public Health, University of Oxford, Old Road Campus, Oxford, OX3 7LF, UK. ; Keane, Thomas The Wellcome Trust Sanger Institute, Wellcome Trust Genome Campus, Hinxton CB10 1HH, Cambridge, UK. ; Keogh, Julia University of Cambridge Metabolic Research Laboratories, and NIHR Cambridge Biomedical Research Centre, Wellcome Trust-MRC Institute of Metabolic Science, Addenbrooke's Hospital, Cambridge, CB2 0QQ, UK. ; Kemp, John MRC Integrative Epidemiology Unit, School of Social and Community Medicine, University of Bristol, Oakfield House, Oakfield Grove, Clifton, Bristol, BS8 2BN, UK. University of Queensland Diamantina Institute, Translational Research Institute, Brisbane, Queensland, Australia ; Kennedy, Karen The Wellcome Trust Sanger Institute, Wellcome Trust Genome Campus, Hinxton CB10 1HH, Cambridge, UK. ; Kolb-Kokocinski, Anja The Wellcome Trust Sanger Institute, Wellcome Trust Genome Campus, Hinxton CB10 1HH, Cambridge, UK. ; Lachance, Genevieve The Department of Twin Research & Genetic Epidemiology, King's College London, St Thomas' Campus, Lambeth Palace Road, London, SE1 7EH, UK. ; Langford, Cordelia The Wellcome Trust Sanger Institute, Wellcome Trust Genome Campus, Hinxton CB10 1HH, Cambridge, UK. ; Lawson, Daniel MRC Integrative Epidemiology Unit, School of Social and Community Medicine, University of Bristol, Oakfield House, Oakfield Grove, Clifton, Bristol, BS8 2BN, UK. ; Lee, Irene Behavioural and Brain Sciences Unit, UCL Institute of Child Health, London, WC1N 1EH, UK. ; Lek, Monkol Analytic and Translational Genetics Unit, Massachusetts General Hospital, Boston MA 02114, USA. ; Liang, Jieqin BGI-Shenzhen, Shenzhen 518083, China. Lin, Hong BGI-Shenzhen, Shenzhen 518083, China. ; Li, Rui Lady Davis Institute, Jewish General Hospital, Montreal, Quebec, Canada. Departments of Medicine & Human Genetics, McGill University, Montreal, Quebec, Canada. ; Li, Yingrui BGI-Shenzhen, Shenzhen 518083, China. ; Liu, Ryan BGI-Europe, London. ; Lönnqvist, Jouko National Institute for Health and Welfare (THL), Helsinki. ; Lopes, Margarida The Wellcome Trust Sanger Institute, Wellcome Trust Genome Campus, Hinxton CB10 1HH, Cambridge, UK. Wellcome Trust Centre for Human Genetics, Roosevelt Drive, Oxford, OX3 7BN, UK. ; Lotchkova, Valentina The Wellcome Trust Sanger Institute, Wellcome Trust Genome Campus, Hinxton CB10 1HH, Cambridge, UK. European Molecular Biology Laboratory, European Bioinformatics Institute, Wellcome Trust Genome Campus, Hinxton, Cambridge CB10 1SD, UK. ; MacArthur, Daniel G The Wellcome Trust Sanger Institute, Wellcome Trust Genome Campus, Hinxton CB10 1HH, Cambridge, UK. Analytic and Translational

Genetics Unit, Massachusetts General Hospital, Boston MA 02114, USA. Program in Medical and Population Genetics, Broad Institute of Harvard and MIT, Cambridge MA 02132, USA. ; Marchini, Jonathan Department of Statistics, University of Oxford, 1 South Parks Road, Oxford OX1 3TG, UK. ; Maslen, John The Wellcome Trust Sanger Institute, Wellcome Trust Genome Campus, Hinxton CB10 1HH, Cambridge, UK. ; Massimo, Mangino The Department of Twin Research & Genetic Epidemiology, King's College London, St Thomas' Campus, Lambeth Palace Road, London, SE1 7EH, UK. ; Mathieson, Iain Department of Genetics, Harvard Medical School, Boston 02115, USA. ; Marenne, Gaëlle The Wellcome Trust Sanger Institute, Wellcome Trust Genome Campus, Hinxton CB10 1HH, Cambridge, UK. ; McCarthy, Shane The Wellcome Trust Sanger Institute, Wellcome Trust Genome Campus, Hinxton CB10 1HH, Cambridge, UK. ; McGuffin, Peter Institute of Psychiatry, Kings College London, 16 De Crespigny Park, London SE5 8AF, UK. ; McIntosh, Andrew Division of Psychiatry, The University of Edinburgh, Royal Edinburgh Hospital, Edinburgh, EH10 5HF, UK. ; McKechnie, Andrew G The Patrick Wild Centre, The University of Edinburgh, Edinburgh, EH10 5HF, UK Division of Psychiatry, The University of Edinburgh, Royal Edinburgh Hospital, Edinburgh, EH10 5HF, UK. ; McQuillin, Andrew University College London (UCL), Molecular Psychiatry Laboratory, Division of Psychiatry, Gower Street, London WC1E 6BT, UK. ; Memari, Yasin The Wellcome Trust Sanger Institute, Wellcome Trust Genome Campus, Hinxton CB10 1HH, Cambridge, UK. ; Metrustry, Sarah The Department of Twin Research & Genetic Epidemiology, King's College London, St Thomas' Campus, Lambeth Palace Road, London, SE1 7EH, UK. ; Min, Josine MRC Integrative Epidemiology Unit, School of Social and Community Medicine, University of Bristol, Oakfield House, Oakfield Grove, Clifton, Bristol, BS8 2BN, UK. ; Mitchison, Hannah M Genetics and Genomic Medicine and Birth Defects Research Centre, UCL Institute of Child Health, London, WC1N 1EH, UK. ; Moayyeri, Alireza The Department of Twin Research & Genetic Epidemiology, King's College London, St Thomas' Campus, Lambeth Palace Road, London, SE1 7EH, UK. The Department of Epidemiology and Biostatistics, Imperial College London, St. Mary's campus, Norfolk Place, Paddington, London W2 1PG, UK. ; Morris, James The Wellcome Trust Sanger Institute, Wellcome Trust Genome Campus, Hinxton CB10 1HH, Cambridge, UK ; Muddyman, Dawn The Wellcome Trust Sanger Institute, Wellcome Trust Genome Campus, Hinxton CB10 1HH, Cambridge, UK. ; Muntoni, Francesco Dubowitz Neuromuscular Centre, UCL Institute of Child Health & Great Ormond Street Hospital, London, WC1N 1EH, UK. ; Northstone, Kate MRC Integrative Epidemiology Unit, School of Social and Community Medicine, University of Bristol, Oakfield House, Oakfield Grove, Clifton, Bristol, BS8 2BN, UK. ; O'Donovan, Michael MRC Centre for Neuropsychiatric Genetics & Genomics, Institute of Psychological Medicine & Clinical Neurosciences, School of Medicine, Cardiff University, Cardiff, CF14 4XN. ; Onoufriadis, Alexandros

Department of Medical and Molecular Genetics, Division of Genetics and Molecular Medicine, King's College London School of Medicine, Guy's Hospital, London SE1 9RT, UK. ; O'Rahilly, Stephen University of Cambridge Metabolic Research Laboratories, and NIHR Cambridge Biomedical Research Centre, Wellcome Trust-MRC Institute of Metabolic Science, Addenbrooke's Hospital, Cambridge, CB2 0QQ, UK. ; Oualkacha, Karim Department of Mathematics, Université de Québec À Montréal, Montréal, Québec, Canada. ; Owen, Michael J. MRC Centre for Neuropsychiatric Genetics & Genomics, Institute of Psychological Medicine & Clinical Neurosciences, School of Medicine, Cardiff University, Cardiff, CF14 4XN. ; Palotie, Aarno The Wellcome Trust Sanger Institute, Wellcome Trust Genome Campus, Hinxton CB10 1HH, Cambridge, UK. Institute for Molecular Medicine Finland (FIMM), University of Helsinki, Helsinki, Finland. Program in Medical and Population Genetics and Genetic Analysis Platform, The Broad Institute of MIT and Harvard, Cambridge, MA 02132, USA. ; Panoutsopoulou, Kalliope The Wellcome Trust Sanger Institute, Wellcome Trust Genome Campus, Hinxton CB10 1HH, Cambridge, UK ; Parker, Victoria University of Cambridge Metabolic Research Laboratories, and NIHR Cambridge Biomedical Research Centre, Wellcome Trust-MRC Institute of Metabolic Science, Addenbrooke's Hospital, Cambridge, CB2 0QQ, UK. ; Parr, Jeremy R Institute of Neuroscience, Henry Wellcome Building for Neuroecology, Newcastle University, Framlington Place, Newcastle upon Tyne, NE2 4HH, UK. ; Paternoster, Lavinia MRC Integrative Epidemiology Unit, School of Social and Community Medicine, University of Bristol, Oakfield House, Oakfield Grove, Clifton, Bristol, BS8 2BN, UK. ; Paunio, Tiina National Institute for Health and Welfare (THL), Helsinki. University of Helsinki, Department of Psychiatry, Helsinki. ; Payne, Felicity The Wellcome Trust Sanger Institute, Wellcome Trust Genome Campus, Hinxton CB10 1HH, Cambridge, UK. ; Perry, John The Department of Twin Research & Genetic Epidemiology, King's College London, St Thomas' Campus, Lambeth Palace Road, London, SE1 7EH, UK. MRC Epidemiology Unit, Institute of Metabolic Science, Box 285, Addenbrooke's Hospital, Hills Road, Cambridge, CB2 0QQ, UK ; Pietilainen, Olli The Wellcome Trust Sanger Institute, Wellcome Trust Genome Campus, Hinxton CB10 1HH, Cambridge, UK. National Institute for Health and Welfare (THL), Helsinki. Institute for Molecular Medicine Finland (FIMM), University of Helsinki, Helsinki, Finland. ; Plagnol, Vincent University College London (UCL) Genetics Institute (UGI) Gower Street, London, WC1E 6BT, UK. ; Quaye, Lydia The Department of Twin Research & Genetic Epidemiology, King's College London, St Thomas' Campus, Lambeth Palace Road, London, SE1 7EH, UK. ; Quail, Michael A. The Wellcome Trust Sanger Institute, Wellcome Trust Genome Campus, Hinxton CB10 1HH, Cambridge, UK. ; Raymond, Lucy Department of Medical Genetics, Cambridge Institute for Medical Research, University of Cambridge, CB2 0XY, UK. ; Rehnström, Karola The Wellcome Trust Sanger Institute, Wellcome Trust Genome Campus, Hinxton CB10 1HH,



Cambridge, UK. ; Richards, Brent The Department of Twin Research & Genetic Epidemiology, King's College London, St Thomas' Campus, Lambeth Palace Road, London, SE1 7EH, UK. Lady Davis Institute, Jewish General Hospital, Montreal, Quebec, Canada. Department of Epidemiology, Biostatistics and Occupational Health, McGill University, Montreal, Quebec, Canada. Departments of Medicine & Human Genetics, McGill University, Montreal, Quebec, Canada. Ring, Susan MRC Integrative Epidemiology Unit, School of Social and Community Medicine, University of Bristol, Oakfield House, Oakfield Grove, Clifton, Bristol, BS8 2BN, UK. ALSPAC School of Social and Community Medicine, University of Bristol, Oakfield House, Oakfield Grove, Clifton, Bristol, BS8 2BN, UK. ; Ritchie, Graham R.S. The Wellcome Trust Sanger Institute, Wellcome Trust Genome Campus, Hinxton CB10 1HH, Cambridge, UK. European Molecular Biology Laboratory, European Bioinformatics Institute, Wellcome Trust Genome Campus, Hinxton, Cambridge CB10 1SD, UK. ; Roberts, Nicola Department of Medical Genetics, Cambridge Institute for Medical Research, University of Cambridge, CB2 0XY, UK. ; Savage, David B University of Cambridge Metabolic Research Laboratories, and NIHR Cambridge Biomedical Research Centre, Wellcome Trust-MRC Institute of Metabolic Science, Addenbrooke's Hospital, Cambridge, CB2 0QQ, UK. ; Scambler, Peter Genetics and Genomic Medicine and Birth Defects Research Centre, UCL Institute of Child Health, London, WC1N 1EH, UK. ; Schiffels, Stephen The Wellcome Trust Sanger Institute, Wellcome Trust Genome Campus, Hinxton CB10 1HH, Cambridge, UK. ; Schmidts, Miriam Genetics and Genomic Medicine and Birth Defects Research Centre, UCL Institute of Child Health, London, WC1N 1EH, UK. ; Schoenmakers, Nadia University of Cambridge Metabolic Research Laboratories, and NIHR Cambridge Biomedical Research Centre, Wellcome Trust-MRC Institute of Metabolic Science, Addenbrooke's Hospital, Cambridge, CB2 0QQ, UK. ; Semple, Robert K University of Cambridge Metabolic Research Laboratories, and NIHR Cambridge Biomedical Research Centre, Wellcome Trust-MRC Institute of Metabolic Science, Addenbrooke's Hospital, Cambridge, CB2 0QQ, UK. ; Serra, Eva The Wellcome Trust Sanger Institute, Wellcome Trust Genome Campus, Hinxton CB10 1HH, Cambridge, UK. ; Sharp, Sally I University College London (UCL), Molecular Psychiatry Laboratory, Division of Psychiatry, Gower Street, London WC1E 6BT, UK. ; Shihab, Hasheem MRC Integrative Epidemiology Unit, School of Social and Community Medicine, University of Bristol, Oakfield House, Oakfield Grove, Clifton, Bristol, BS8 2BN, UK. ; Shin, So-Youn The Wellcome Trust Sanger Institute, Wellcome Trust Genome Campus, Hinxton CB10 1HH, Cambridge, UK. MRC Integrative Epidemiology Unit, School of Social and Community Medicine, University of Bristol, Oakfield House, Oakfield Grove, Clifton, Bristol, BS8 2BN, UK. ; Skuse, David Behavioural and Brain Sciences Unit, UCL Institute of Child Health, London, WC1N 1EH, UK. ; Small, Kerrin The Department of Twin Research & Genetic Epidemiology, King's

College London, St Thomas' Campus, Lambeth Palace Road, London, SE1 7EH, UK. ; Soler Artigas, Maria Departments of Health Sciences and Genetics, University of Leicester, Leicester, UK. ; Soranzo, Nicole The Wellcome Trust Sanger Institute, Wellcome Trust Genome Campus, Hinxton CB10 1HH, Cambridge, UK. ; Southam, Lorraine The Wellcome Trust Sanger Institute, Wellcome Trust Genome Campus, Hinxton CB10 1HH, Cambridge, UK. Wellcome Trust Centre for Human Genetics, Roosevelt Drive, Oxford, OX3 7BN, UK. ; Spasic-Boskovic, Olivera Department of Medical Genetics, Cambridge Institute for Medical Research, University of Cambridge, CB2 0XY, UK. ; Spector, Tim The Department of Twin Research & Genetic Epidemiology, King's College London, St Thomas' Campus, Lambeth Palace Road, London, SE1 7EH, UK. ; Stalker, Jim The Wellcome Trust Sanger Institute, Wellcome Trust Genome Campus, Hinxton CB10 1HH, Cambridge, UK. ; St Clair, David Institute of Medical Sciences, University of Aberdeen, AB25 2ZD, UK. ; Stevens, Elizabeth Dubowitz Neuromuscular Centre, UCL Institute of Child Health & Great Ormond Street Hospital, London, WC1N 1EH, UK. ; St Pourcian, Beate MRC Integrative Epidemiology Unit, School of Social and Community Medicine, University of Bristol, Oakfield House, Oakfield Grove, Clifton, Bristol, BS8 2BN, UK. School of Oral and Dental Sciences, University of Bristol, Lower Maudlin Street, Bristol, BS1 2LY, UK School of Experimental Psychology, University of Bristol, 12a Priory Road, Bristol, BS8 1TU, UK. ; Sun, Jianping Lady Davis Institute, Jewish General Hospital, Montreal, Quebec, Canada. Department of Epidemiology, Biostatistics and Occupational Health, McGill University, Montreal, Quebec, Canada ; Surdulescu, Gabriela The Department of Twin Research & Genetic Epidemiology, King's College London, St Thomas' Campus, Lambeth Palace Road, London, SE1 7EH, UK. ; Suvisaari, Jaana National Institute for Health and Welfare (THL), Helsinki. ; Tachmazidou, Ionna The Wellcome Trust Sanger Institute, Wellcome Trust Genome Campus, Hinxton CB10 1HH, Cambridge, UK. ; Jing Tian BGI-Shenzhen, Shenzhen 518083, China. ; Timpson, Nicholas MRC Integrative Epidemiology Unit, School of Social and Community Medicine, University of Bristol, Oakfield House, Oakfield Grove, Clifton, Bristol, BS8 2BN, UK. ; Tobin, Martin D. The Wellcome Trust Sanger Institute, Wellcome Trust Genome Campus, Hinxton CB10 1HH, Cambridge, UK. ; Valdes, Ana The Department of Twin Research & Genetic Epidemiology, King's College London, St Thomas' Campus, Lambeth Palace Road, London, SE1 7EH, UK. ; Van Kogelenberg, Margriet The Wellcome Trust Sanger Institute, Wellcome Trust Genome Campus, Hinxton CB10 1HH, Cambridge, UK. ; Vijayarangakannan, Parthiban The Wellcome Trust Sanger Institute, Wellcome Trust Genome Campus, Hinxton CB10 1HH, Cambridge, UK. ; Visscher, Peter M. Queensland Brain Institute, University of Queensland, Brisbane, Queensland 4072, Australia. University of Queensland Diamantina Institute, Translational Research Institute, Brisbane, Queensland, Australia ; Wain, Louise V Departments of Health Sciences and

Genetics, University of Leicester, Leicester, UK. ; Walter, Klaudia The Wellcome Trust Sanger Institute, Wellcome Trust Genome Campus, Hinxton CB10 1HH, Cambridge, UK. ; Walters, James T.R. MRC Centre for Neuropsychiatric Genetics & Genomics, Institute of Psychological Medicine & Clinical Neurosciences, School of Medicine, Cardiff University, Cardiff, CF14 4XN. ; Wang, Guangbiao BGI-Shenzhen, Shenzhen 518083, China. ; Wang, Jun BGI-Shenzhen, Shenzhen 518083, China. Department of Biology, University of Copenhagen, Ole Maaløes Vej 5, 2200 Copenhagen, Denmark. Princess Al Jawhara Albrahim Center of Excellence in the Research of Hereditary Disorders, King Abdulaziz University, Jeddah, Saudi Arabia; Macau University of Science and Technology, Avenida Wai long, Taipa, Macau 999078, China; Department of Medicine and State Key Laboratory of Pharmaceutical Biotechnology, University of Hong Kong, 21 Sassoon Road, Hong Kong ; Wang, Yu BGI-Shenzhen, Shenzhen 518083, China. ; Ward, Kirsten The Department of Twin Research & Genetic Epidemiology, King's College London, St Thomas' Campus, Lambeth Palace Road, London, SE1 7EH, UK. ; Wheeler, Elanor The Wellcome Trust Sanger Institute, Wellcome Trust Genome Campus, Hinxton CB10 1HH, Cambridge, UK. ; Whyte, Tamiaka Dubowitz Neuromuscular Centre, UCL Institute of Child Health & Great Ormond Street Hospital, London, WC1N 1EH, UK. ; Williams, Hywel MRC Centre for Neuropsychiatric Genetics & Genomics, Institute of Psychological Medicine & Clinical Neurosciences, School of Medicine, Cardiff University, Cardiff, CF14 4XN. ; Williamson, Kathleen A MRC Human Genetics Unit, MRC Institute of Genetics and Molecular Medicine, at the University of Edinburgh, Western General Hospital, Edinburgh, EH4 2XU, UK. ; Wilson, Crispian Department of Medical Genetics, Cambridge Institute for Medical Research, University of Cambridge, CB2 0XY, UK. ; Wilson, Scott G The Department of Twin Research & Genetic Epidemiology, King's College London, St Thomas' Campus, Lambeth Palace Road, London, SE1 7EH, UK. School of Medicine and Pharmacology, University of Western Australia, Perth, WA, Australia Department of Endocrinology and Diabetes, Sir Charles Gairdner Hospital, Nedlands, WA, Australia. ; Wong, Kim The Wellcome Trust Sanger Institute, Wellcome Trust Genome Campus, Hinxton CB10 1HH, Cambridge, UK. ; Xu, ChangJiang Lady Davis Institute, Jewish General Hospital, Montreal, Quebec, Canada. Department of Epidemiology, Biostatistics and Occupational Health, McGill University, Montreal, Quebec, Canada ; Yang, Jian Queensland Brain Institute, University of Queensland, Brisbane, Queensland 4072, Australia. University of Queensland Diamantina Institute, Translational Research Institute, Brisbane, Queensland, Australia ; Zeggini, Eleftheria The Wellcome Trust Sanger Institute, Wellcome Trust Genome Campus, Hinxton CB10 1HH, Cambridge, UK. ; Zhang, Feng The Department of Twin Research & Genetic Epidemiology, King's College London, St Thomas' Campus, Lambeth Palace Road, London, SE1 7EH, UK. ; Zhang, Pingbo BGI-Shenzhen, Shenzhen 518083, China. ; Zheng, Hou-Feng Lady Davis

Institute, Jewish General Hospital, Montreal, Quebec, Canada. Departments of Medicine & Human Genetics, McGill University, Montreal, Quebec, Canada. ;

**The Kaiser Permanente Division of Research:** Carlos Iribarren MD MPH, Alan S. Go MD, Division of Research, Kaiser Permanente Medical Care Program, Oakland, CA, USA

**The Aneurysm Consortium:** Seamus C Harrison, Cardiovascular Medicine, University College London, London WC1E 6JF, UK; Benjamin J Wright, Cardiovascular Sciences, University of Leicester, Leicester LE2 7LX, UK; Suzannah Bumpstead, Genetics of Complex Traits in Humans Group, Wellcome Trust Sanger Institute, Cambridge CB10 1SA, UK; Annette F Baas, Medical Genetics Research Section, University Medical Center Utrecht, 3584 CG Utrecht, The Netherlands; Solveig Gretarsdottir, deCODE Genetics and University of Iceland Faculty of Medicine, IS-101 Reykjavik, Iceland; Stephen A Badger, School of Medicine, Queens University, Belfast BT7 1NN, UK, Declan T Bradley, School of Medicine, Queens University, Belfast BT7 1NN, UK; Kevin Burnand, Department of Vascular Surgery, King's College London, London WC2R 2LS, UK; Anne H Child, Department of Vascular Surgery, St George's University of London, London SW17 0RE, UK; Rachel E Clough, Department of Vascular Surgery, King's College London, London WC2R 2LS, UK; Gillian Cockerill, Department of Vascular Surgery, St George's University of London, London SW17 0RE, UK; Hany Hafez, Department of Vascular Surgery, St Richard's Hospital, Chichester PO19 6SE, UK; D Julian A Scott, Simon Futers, Anne Johnson, Soroush Sohrabi, Leeds Institute of Genetics, Health and Technology, University of Leeds, Leeds LS2 9JT, UK; Alberto Smith, Department of Vascular Surgery, King's College London, London WC2R 2LS, UK; Matthew M Thompson, Department of Vascular Surgery, St George's University of London, London SW17 0RE, UK; Frank M van Bockxmeer, Department of Surgery, University of Western Australia, Crawley WA6009, Australia, Matthew Waltham, Department of Vascular Surgery, King's College London, London WC2R 2LS, UK; Stefan E Matthiasson, Laekning Medical Clinics, IS-108 Reykjavik, Iceland; Gudmar Thorleifsson, Unnur Thorsteinsdottir, deCODE Genetics and University of Iceland Faculty of Medicine, IS-101 Reykjavik, Iceland; Jan D Blankensteijn, Department of Vascular Surgery VU Medical Center, 1007 MB Amsterdam, The Netherlands; Joep AW Teijink, Department of Vascular Surgery, Catharina Hospital, 5623 EJ Eindhoven, The Netherlands; Cisca Wijmenga, Department of Genetics, UMC Groningen, 9700 RB Groningen, The Netherlands; Jacqueline de Graaf, Lambertus A Kiemeney, Department of Internal Medicine, Radboud University Nijmegen Medical Centre, 6500 HB Nijmegen, The Netherlands; Jutta Palmen, Andrew J Smith Cardiovascular Medicine, University College London, London WC1E 6JF, UK, Sarah Edkins, Rhian Gwilliam, Sarah E Hunt, Simon Potter, Genetics of Complex Traits in

Humans Group, Wellcome Trust Sanger Institute, Cambridge CB10 1SA, UK; Jes S Lindholt, Department of Vascular Surgery, Viborg Hospital, 8800 Viborg, Denmark; Anne E Hughes, School of Medicine, Queens University, Belfast BT7 1NN, UK, Jonathan Golledge, Vascular Biology Unit, James Cook University, Townsville QLD 4811, Australia; Paul E Norman, Department of Surgery, University of Western Australia, Crawley WA6009, Australia Janet T Powell, Department of Surgery and Cancer, Imperial College London, London SW7 2AZ, UK, Per Eriksson, Cardiovascular Medicine, Karolinska Institute, SE-171 77 Stockholm, Sweden; Kari Stefansson, deCODE Genetics and University of Iceland Faculty of Medicine, IS-101 Reykjavik, Iceland; John R Thompson, Health Sciences, University of Leicester, LE2 7LX, UK; Steve E Humphries, Cardiovascular Medicine, University College London, London WC1E 6JF, UK; Robert D Sayers, Cardiovascular Sciences, University of Leicester, Leicester LE2 7LX, UK; Panos Deloukas, Genetics of Complex Traits in Humans Group, Wellcome Trust Sanger Institute, Cambridge CB10 1SA, UK and Nilesh J Samani, Cardiovascular Sciences, University of Leicester, Leicester LE2 7LX, UK.

**The Australian Asthma Genetics Consortium:** Melanie C Matheson , Centre for Epidemiology and Biostatistics, University of Melbourne, Melbourne, VIC, Australia ;David L Duffy , QIMR-Berghofer Medical Research Institute, Brisbane, QLD, Australia ; Jennie Hui , Busselton Population Medical Research Foundation, Sir Charles Gairdner Hospital, Perth, WA, Australia ;Peter Le Souëf , School of Paediatrics and Child Health, Princess Margaret Hospital for Children, Perth, WA, Australia ;Patrick Danoy , University of Queensland Diamantina Institute, Princess Alexandra Hospital, Brisbane, QLD, Australia ;Dale R Nyholt , QIMR-Berghofer Medical Research Institute, Brisbane, QLD, Australia ;Mark Jenkins , Centre for Molecular, Environmental, Genetic, and Analytic Epidemiology, University of Melbourne, Melbourne, VIC, Australia ;Catherine Hayden , School of Paediatrics and Child Health, Princess Margaret Hospital for Children, Perth, WA, Australia ;Wei Ang , School of Women's and Infant's Health, University of Western Australia, Subiaco, WA, Australia ;John Beilby , Busselton Population Medical Research Foundation, Sir Charles Gairdner Hospital, Perth, WA, Australia ;Faang Cheah , Lung Institute of Western Australia, University of Western Australia, Perth, WA, Australia ;Désirée Mészáros , Menzies Research Institute, Hobart, TAS, Australia ;Mary Roberts , Department of Respiratory Medicine, Royal Children's Hospital, Parkville, VIC, Australia ;Melissa C Southey , Department of Pathology, The University of Melbourne, Melbourne, VIC, Australia ;Euan R Tovey , Woolcock Institute of Medical Research, University of Sydney, Sydney, NSW, Australia ;Nicole M Warrington , Telethon Institute for Child Health Research, Centre for Child Health Research, University of Western Australia, Perth, WA, Australia ;Loren Price , Lung Institute of Western Australia,

University of Western Australia, Perth, WA, Australia ;Margaret J Wright , QIMR-Berghofer Medical Research Institute, Brisbane, QLD, Australia ;Scott D Gordon , QIMR-Berghofer Medical Research Institute, Brisbane, QLD, Australia ;Li P Chung , Lung Institute of Western Australia, University of Western Australia, Perth, WA, Australia ;Anjali K Henders , QIMR-Berghofer Medical Research Institute, Brisbane, QLD, Australia ;Graham Giles , Cancer Epidemiology Centre, The Cancer Council Victoria, Melbourne, VIC, Australia ;Paul S Thomas , Faculty of Medicine, University of New South Wales, Sydney, NSW, Australia ;Suzanna Temple , Lung Institute of Western Australia, University of Western Australia, Perth, WA, Australia ;John B Whitfield , QIMR-Berghofer Medical Research Institute, Brisbane, QLD, Australia ;Ian Feather , Gold Coast Hospital, Southport, QLD, Australia ;Stephen Morrison , University of Queensland, Brisbane, QLD, Australia ;Peter D Sly , Queensland Children's Medical Research Institute, Brisbane, QLD, Australia ;Chalermchai Mitrpant , Lung Institute of Western Australia, University of Western Australia, Perth, WA, Australia ;Warwick J Britton , Centenary Institute and University of Sydney, Camperdown, NSW, Australia ;David John , Menzies Research Institute, Hobart, TAS, Australia ;Pat G Holt , Telethon Institute for Child Health Research, Centre for Child Health Research, University of Western Australia, Perth, WA, Australia ;Andrew S Kemp , The Children's Hospital, Westmead, Sydney, NSW, Australia ;Pamela A Madden , Department of Psychiatry, Washington University School of Medicine, St Louis, MO, USA ;Andrew C Heath , Department of Psychiatry, Washington University School of Medicine, St Louis, MO, USA ;John L Hopper , Centre for Molecular, Environmental, Genetic, and Analytic Epidemiology, University of Melbourne, Melbourne, VIC, Australia ; Peter M Visscher , The University of Queensland, Queensland Brain Institute, Brisbane, Queensland, Australia ;Bill Musk , Busselton Population Medical Research Foundation, Sir Charles Gairdner Hospital, Perth, WA, Australia ;Stephen R Leeder , Australian Health Policy Institute, University of Sydney, Sydney, NSW, Australia ;Craig Pennell , Busselton Population Medical Research Foundation, Sir Charles Gairdner Hospital, Perth, WA, Australia ;Haydn Walters , Menzies Research Institute, Hobart, TAS, Australia ;Nicholas G Martin , QIMR-Berghofer Medical Research Institute, Brisbane, QLD, Australia ; Alan James , Busselton Population Medical Research Foundation, Sir Charles Gairdner Hospital, Perth, WA, Australia ; Graham Jones , School of Science and Health, University of Western Sydney, Penrith, New South Wales, Australia ; Colin F Robertson , Respiratory Medicine, Murdoch Children's Research Institute, Melbourne, Victoria, Australia ; Shyamali C Dharmage , Centre for Molecular, Environmental, Genetic, and Analytic Epidemiology, University of Melbourne, Melbourne, VIC, Australia ; Matthew A Brown , University of Queensland Diamantina Institute, Princess Alexandra Hospital, Brisbane, QLD, Australia ; Grant W Montgomery , QIMR-Berghofer Medical Research Institute, Brisbane, QLD, Australia ; Philip J Thompson ,

Lung Institute of Western Australia, University of Western Australia, Perth, WA, Australia ;

**arcOGEN:** Nigel Arden, Kay Chapman, Andrew Carr, Panos Deloukas, Michael Doherty, Andrew McCaskie, William E.R. Ollier, Stuart H. Ralston, Tim D. Spector, Ana M. Valdes, Gillian A. Wallis, J. Mark Wilkinson, Eleftheria Zeggini, John Loughlin

**CHARGE – haematology working group:** Margaux F. Keller Laboratory of Neurogenetics, National Institute on Aging, National Institutes of Health, Bethesda, Maryland, United States of America Department of Biological Anthropology, Temple University, Philadelphia, PA, United States of America ; Alexander P. Reiner Department of Epidemiology, University of Washington, Seattle, Washington, United States of America Division of Public Health Sciences, Fred Hutchinson Cancer Research Center, Seattle, Washington, United States of America ; Frank J. A. van Rooij Department of Epidemiology, Erasmus MC, Rotterdam, The Netherlands, Netherlands Consortium for Healthy Aging (NGI-NCHA), The Netherlands Genomics Initiative, Leiden, The Netherlands ; Andrew D. Johnson Cardiovascular Epidemiology and Human Genomics Branch, NHLBI Division of Intramural Research NHLBI Framingham Heart Study ; Ming-Huei Chen Boston University Department of Statistics NHLBI Framingham Heart Study ; Albert V. Smith Icelandic Heart Association, Kopavogur, Iceland, University of Iceland, Reykjavik, Iceland ; Andrew Morris Genetic and Genomic Epidemiology Unit, Wellcome Trust Centre for Human Genetics, University of Oxford ; Toshiko Tanaka Longitudinal Studies Section, Clinical Research Branch, NIA, NIH, Baltimore, Maryland, United States of America ; Luigi Ferrucci Longitudinal Studies Section, Clinical Research Branch, NIA, NIH, Baltimore, Maryland, United States of America ; Alan B. Zonderman Laboratory of Personality and Cognition, National Institute on Aging, National Institutes of Health, Baltimore, Maryland, United States of America ; Guillaume Lettre Montreal Heart Institute, Montréal, Canada Département de Médecine, Université de Montréal, Montréal, Canada ; Tamara Harris Laboratory for Epidemiology, Demography, and Biometry, National Institute on Aging, National Institutes of Health, Baltimore, Maryland, United States of America ; Melissa Garcia Laboratory for Epidemiology, Demography, and Biometry, National Institute on Aging, National Institutes of Health, Baltimore, Maryland, United States of America ; Stefania Bandinelli Geriatric Rehabilitation Unit, Azienda Sanitaria Firenze (ASF), Florence, Italy ; Rehan Qayyum GeneSTAR Research Program, Division of General Internal Medicine, Johns Hopkins School of Medicine, Baltimore, MD ; Lisa R. Yanek GeneSTAR Research Program, Division of General Internal Medicine, Johns Hopkins School of Medicine, Baltimore, MD ; Diane M. Becker GeneSTAR Research Program, Division of General Internal Medicine, Johns Hopkins School of Medicine,

Baltimore, MD ; Lewis C. Becker GeneSTAR Research Program, Division of General Internal Medicine, Johns Hopkins School of Medicine, Baltimore, MD Division of Cardiology, Johns Hopkins School of Medicine, Baltimore, MD ; Charles Kooperberg Division of Public Health Sciences, Fred Hutchinson Cancer Research Center, Seattle, Washington, United States of America ; Brendan Keating Center for Applied Genomics, Children's Hospital of Philadelphia, PA, USA Dept of Pediatrics, University of Pennsylvania, PA, USA ; Jared Reis Division of Cardiovascular Sciences, National Heart, Lung, and Blood Institute, Bethesda, Maryland, United States of America ; Hua Tang Stanford University School of Medicine ; Eric Boerwinkle The Brown Foundation, Institute of Molecular Medicine for the Prevention of Human Diseases, University of Texas, Houston, Texas, United States of America ; Dan L. Longo Clinical Research Branch, National Institute on Aging, Baltimore, Maryland, United States of America ; Andrew B. Singleton Laboratory of Neurogenetics, National Institute on Aging, National Institutes of Health, Bethesda, Maryland, United States of America ; Bruce Patsy University of Washington, Seattle, Washington, United States of America ; Michelle K. Evans Health Disparities Research Section, Clinical Research Branch, National Institute on Aging, National Institutes of Health, Baltimore, Maryland, United States of America ; L. Adrienne Cupples Boston University Department of Statistics NHLBI Framingham Heart Study ; Jerome Rotter Institute for Translational Genomics and Population Sciences, Los Angeles BioMedical Research Institute at Harbor-UCLA Medical Center Division of Genetic Outcomes, Department of Pediatrics, Harbor-UCLA Medical Center ; Christopher J. O'Donnell NHLBI Division of Intramural Research NHLBI Framingham Heart Study Massachusetts General Hospital Division of Cardiology ; Santhi K. Ganesh Division of Cardiovascular Medicine, Department of Internal Medicine, University of Michigan, Ann Arbor, Michigan, United States of America ; James G. Wilson Department of Physiology and Biophysics, University of Mississippi Medical Center, Jackson, Mississippi, United States of America ; Jerome I. Rotter, Institute for Translational Genomics and Population Sciences, Los Angeles Biomedical Research Institute and Department of Pediatrics, Harbor-UCLA Medical Center, Torrance, California 90502; Mike A. Nalls Laboratory of Neurogenetics, National Institute on Aging, National Institutes of Health, Bethesda, Maryland, United States of America ;

**International Parkinson's Disease Consortium:** Mike A Nalls (Laboratory of Neurogenetics, National Institute on Aging, National Institutes of Health, Bethesda, MD, USA), Vincent Plagnol (UCL Genetics Institute, London, UK), Dena G Hernandez (Laboratory of Neurogenetics, National Institute on Aging; and Department of Molecular Neuroscience, UCL Institute of Neurology, London, UK), Manu Sharma (Department for Neurodegenerative Diseases, Hertie Institute for Clinical Brain Research, University of



Tübingen, and DZNE, German Center for Neurodegenerative Diseases, Tübingen, Germany), Una-Marie Sheerin (Department of Molecular Neuroscience, UCL Institute of Neurology), Mohamad Saad (INSERM U563, CPTP, Toulouse, France; and Paul Sabatier University, Toulouse, France), Javier Simón-Sánchez (Department of Clinical Genetics, Section of Medical Genomics, VU University Medical Centre, Amsterdam, Netherlands), Claudia Schulte (Department for Neurodegenerative Diseases, Hertie Institute for Clinical Brain Research), Suzanne Lesage (INSERM, UMR\_S975 [formerly UMR\_S679], Paris, France; Université Pierre et Marie Curie-Paris, Centre de Recherche de l'Institut du Cerveau et de la Moelle épinière, Paris, France; and CNRS, Paris, France), Sigurlaug Sveinbjörnsdóttir (Department of Neurology, Landspítali University Hospital, Reykjavík, Iceland; Department of Neurology, MEHT Broomfield Hospital, Chelmsford, Essex, UK; and Queen Mary College, University of London, London, UK), Sampath Arepalli (Laboratory of Neurogenetics, National Institute on Aging), Roger Barker (Department of Neurology, Addenbrooke's Hospital, University of Cambridge, Cambridge, UK), Yoav Ben-Shlomo (School of Social and Community Medicine, University of Bristol), Henk W Berendse (Department of Neurology and Alzheimer Center, VU University Medical Center), Daniela Berg (Department for Neurodegenerative Diseases, Hertie Institute for Clinical Brain Research and DZNE, German Center for Neurodegenerative diseases), Kailash Bhatia (Department of Motor Neuroscience, UCL Institute of Neurology), Rob M A de Bie (Department of Neurology, Academic Medical Center, University of Amsterdam, Amsterdam, Netherlands), Alessandro Biffi (Center for Human Genetic Research and Department of Neurology, Massachusetts General Hospital, Boston, MA, USA; and Program in Medical and Population Genetics, Broad Institute, Cambridge, MA, USA), Bas Bloem (Department of Neurology, Radboud University Nijmegen Medical Centre, Nijmegen, Netherlands), Zoltan Bochdanovits (Department of Clinical Genetics, Section of Medical Genomics, VU University Medical Centre), Michael Bonin (Department of Medical Genetics, Institute of Human Genetics, University of Tübingen, Tübingen, Germany), Jose M Bras (Department of Molecular Neuroscience, UCL Institute of Neurology), Kathrin Brockmann (Department for Neurodegenerative Diseases, Hertie Institute for Clinical Brain Research and DZNE, German Center for Neurodegenerative diseases), Janet Brooks (Laboratory of Neurogenetics, National Institute on Aging), David J Burn (Newcastle University Clinical Ageing Research Unit, Campus for Ageing and Vitality, Newcastle upon Tyne, UK), Elisa Majounie (Laboratory of Neurogenetics, National Institute on Aging), Gavin Charlesworth (Department of Molecular Neuroscience, UCL Institute of Neurology), Codrin Lungu (National Institutes of Health Parkinson Clinic, NINDS, National Institutes of Health), Honglei Chen (Epidemiology Branch, National Institute of Environmental Health Sciences, National Institutes of Health, NC, USA), Patrick F Chinnery (Neurology M4104, The Medical School,

Framlington Place, Newcastle upon Tyne, UK), Sean Chong (Laboratory of Neurogenetics, National Institute on Aging), Carl E Clarke (School of Clinical and Experimental Medicine, University of Birmingham, Birmingham, UK; and Department of Neurology, City Hospital, Sandwell and West Birmingham Hospitals NHS Trust, Birmingham, UK), Mark R Cookson (Laboratory of Neurogenetics, National Institute on Aging), J Mark Cooper (Department of Clinical Neurosciences, UCL Institute of Neurology), Jean Christophe Corvol (INSERM, UMR\_S975; Université Pierre et Marie Curie-Paris; CNRS; and INSERM CIC-9503, Hôpital Pitié-Salpêtrière, Paris, France), Carl Counsell (University of Aberdeen, Division of Applied Health Sciences, Population Health Section, Aberdeen, UK), Philippe Damier (CHU Nantes, CIC0004, Service de Neurologie, Nantes, France), Jean-François Dartigues (INSERM U897, Université Victor Segalen, Bordeaux, France), Panos Deloukas (Wellcome Trust Sanger Institute, Wellcome Trust Genome Campus, Cambridge, UK), Günther Deuschl (Klinik für Neurologie, Universitätsklinikum Schleswig-Holstein, Campus Kiel, Christian-Albrechts-Universität Kiel, Kiel, Germany), David T Dexter (Parkinson's Disease Research Group, Faculty of Medicine, Imperial College London, London, UK), Karin D van Dijk (Department of Neurology and Alzheimer Center, VU University Medical Center), Allissa Dillman (Laboratory of Neurogenetics, National Institute on Aging), Frank Durif (Service de Neurologie, Hôpital Gabriel Montpied, Clermont-Ferrand, France), Alexandra Dürr (INSERM, UMR\_S975; Université Pierre et Marie Curie-Paris; CNRS; and AP-HP, Pitié-Salpêtrière Hospital), Sarah Edkins (Wellcome Trust Sanger Institute), Jonathan R Evans (Cambridge Centre for Brain Repair, Cambridge, UK), Thomas Foltynie (UCL Institute of Neurology), Jing Dong (Epidemiology Branch, National Institute of Environmental Health Sciences), Michelle Gardner (Department of Molecular Neuroscience, UCL Institute of Neurology), J Raphael Gibbs (Laboratory of Neurogenetics, National Institute on Aging; and Department of Molecular Neuroscience, UCL Institute of Neurology), Alison Goate (Department of Psychiatry, Department of Neurology, Washington University School of Medicine, MI, USA), Emma Gray (Wellcome Trust Sanger Institute), Rita Guerreiro (Department of Molecular Neuroscience, UCL Institute of Neurology), Clare Harris (University of Aberdeen), Jacobus J van Hilten (Department of Neurology, Leiden University Medical Center, Leiden, Netherlands), Albert Hofman (Department of Epidemiology, Erasmus University Medical Center, Rotterdam, Netherlands), Albert Hollenbeck (AARP, Washington DC, USA), Janice Holton (Queen Square Brain Bank for Neurological Disorders, UCL Institute of Neurology), Michele Hu (Department of Clinical Neurology, John Radcliffe Hospital, Oxford, UK), Xuemei Huang (Departments of Neurology, Radiology, Neurosurgery, Pharmacology, Kinesiology, and Bioengineering, Pennsylvania State University– Milton S Hershey Medical Center, Hershey, PA, USA), Isabel Wurster (Department for Neurodegenerative Diseases, Hertie Institute for Clinical

Brain Research and German Center for Neurodegenerative diseases), Walter Mätzler (Department for Neurodegenerative Diseases, Hertie Institute for Clinical Brain Research and German Center for Neurodegenerative diseases), Gavin Hudson (Neurology M4104, The Medical School, Newcastle upon Tyne, UK), Sarah E Hunt (Wellcome Trust Sanger Institute), Johanna Huttenlocher (deCODE genetics), Thomas Illig (Institute of Epidemiology, Helmholtz Zentrum München, German Research Centre for Environmental Health, Neuherberg, Germany), Pálmi V Jónsson (Department of Geriatrics, Landspítali University Hospital, Reykjavík, Iceland), Jean-Charles Lambert (INSERM U744, Lille, France; and Institut Pasteur de Lille, Université de Lille Nord, Lille, France), Cordelia Langford (Cambridge Centre for Brain Repair), Andrew Lees (Queen Square Brain Bank for Neurological Disorders), Peter Lichtner (Institute of Human Genetics, Helmholtz Zentrum München, German Research Centre for Environmental Health, Neuherberg, Germany), Patricia Limousin (Institute of Neurology, Sobell Department, Unit of Functional Neurosurgery, London, UK), Grisel Lopez (Section on Molecular Neurogenetics, Medical Genetics Branch, NHGRI, National Institutes of Health), Delia Lorenz (Klinik für Neurologie, Universitätsklinikum Schleswig-Holstein), Codrin Lungu (National Institutes of Health Parkinson Clinic, NINDS, National Institutes of Health), Alisdair McNeill (Department of Clinical Neurosciences, UCL Institute of Neurology), Catriona Moorby (School of Clinical and Experimental Medicine, University of Birmingham), Matthew Moore (Laboratory of Neurogenetics, National Institute on Aging), Huw R Morris (MRC Centre for Neuropsychiatric Genetics and Genomics, Cardiff University School of Medicine, Cardiff, UK), Karen E Morrison (School of Clinical and Experimental Medicine, University of Birmingham; and Neurosciences Department, Queen Elizabeth Hospital, University Hospitals Birmingham NHS Foundation Trust, Birmingham, UK), Ese Mudanohwo (Neurogenetics Unit, UCL Institute of Neurology and National Hospital for Neurology and Neurosurgery), Sean S O'Sullivan (Queen Square Brain Bank for Neurological Disorders), Justin Pearson (MRC Centre for Neuropsychiatric Genetics and Genomics), Joel S Perlmutter (Department of Neurology, Radiology, and Neurobiology at Washington University, St Louis), Hjörvar Pétursson (deCODE genetics; and Department of Medical Genetics, Institute of Human Genetics, University of Tübingen), Pierre Pollak (Service de Neurologie, CHU de Grenoble, Grenoble, France), Bart Post (Department of Neurology, Radboud University Nijmegen Medical Centre), Simon Potter (Wellcome Trust Sanger Institute), Bernard Ravina (Translational Neurology, Biogen Idec, MA, USA), Tamas Revesz (Queen Square Brain Bank for Neurological Disorders), Olaf Riess (Department of Medical Genetics, Institute of Human Genetics, University of Tübingen), Fernando Rivadeneira (Departments of Epidemiology and Internal Medicine, Erasmus University Medical Center), Patrizia Rizzu (Department of Clinical Genetics, Section of Medical Genomics, VU University Medical Centre), Mina

Ryten (Department of Molecular Neuroscience, UCL Institute of Neurology), Stephen Sawcer (University of Cambridge, Department of Clinical Neurosciences, Addenbrooke's hospital, Cambridge, UK), Anthony Schapira (Department of Clinical Neurosciences, UCL Institute of Neurology), Hans Scheffer (Department of Human Genetics, Radboud University Nijmegen Medical Centre, Nijmegen, Netherlands), Karen Shaw (Queen Square Brain Bank for Neurological Disorders), Ira Shoulson (Department of Neurology, University of Rochester, Rochester, NY, USA), Ellen Sidransky (Section on Molecular Neurogenetics, Medical Genetics Branch, NHGRI), Colin Smith (Department of Pathology, University of Edinburgh, Edinburgh, UK), Chris C A Spencer (Wellcome Trust Centre for Human Genetics, Oxford, UK), Hreinn Stefánsson (deCODE genetics), Francesco Bettella (deCODE genetics), Joanna D Stockton (School of Clinical and Experimental Medicine), Amy Strange (Wellcome Trust Centre for Human Genetics), Kevin Talbot (University of Oxford, Department of Clinical Neurology, John Radcliffe Hospital, Oxford, UK), Carlie M Tanner (Clinical Research Department, The Parkinson's Institute and Clinical Center, Sunnyvale, CA, USA), Avazeh Tashakkori-Ghanbaria (Wellcome Trust Sanger Institute), François Tison (Service de Neurologie, Hôpital Haut-Lévêque, Pessac, France), Daniah Trabzuni (Department of Molecular Neuroscience, UCL Institute of Neurology), Bryan J Traynor (Laboratory of Neurogenetics, National Institute on Aging), André G Uitterlinden (Departments of Epidemiology and Internal Medicine, Erasmus University Medical Center), Daan Velseboer (Department of Neurology, Academic Medical Center), Marie Vidailhet (INSERM, UMR\_S975, Université Pierre et Marie Curie-Paris, CNRS, UMR 7225), Robert Walker (Department of Pathology, University of Edinburgh), Bart van de Warrenburg (Department of Neurology, Radboud University Nijmegen Medical Centre), Mirdhu Wickremaratchi (Department of Neurology, Cardiff University, Cardiff, UK), Nigel Williams (MRC Centre for Neuropsychiatric Genetics and Genomics), Caroline H Williams-Gray (Department of Neurology, Addenbrooke's Hospital), Sophie Winder-Rhodes (Department of Psychiatry and Medical Research Council and Wellcome Trust Behavioural and Clinical Neurosciences Institute, University of Cambridge), Kári Stefánsson (deCODE genetics), Maria Martinez (INSERM UMR 1043; and Paul Sabatier University), Nicholas W Wood (UCL Genetics Institute; and Department of Molecular Neuroscience, UCL Institute of Neurology), John Hardy (Department of Molecular Neuroscience, UCL Institute of Neurology), Peter Heutink (Department of Clinical Genetics, Section of Medical Genomics, VU University Medical Centre), Alexis Brice (INSERM, UMR\_S975, Université Pierre et Marie Curie-Paris, CNRS, UMR 7225, AP-HP, Pitié-Salpêtrière Hospital), Thomas Gasser (Department for Neurodegenerative Diseases, Hertie Institute for Clinical Brain Research, and DZNE, German Center for Neurodegenerative Diseases), Andrew B Singleton (Laboratory of Neurogenetics, National Institute on Aging).

**Breast Cancer Association Consortium (BCAC):** John L Hopper (ABCFS: Centre for Molecular, Environmental, Genetic and Analytic Epidemiology, Melbourne School of Population Health, The University of Melbourne, Melbourne, Australia), Mellissa C Southey (ABCFS: Department of Pathology, The University of Melbourne, Melbourne, Australia), Femke Atsma (ABCS: Sanquin Research, Nijmegen, The Netherlands), Marjanka K Schmidt (ABCS: Netherlands Cancer Institute, Antoni van Leeuwenhoek hospital, Amsterdam, The Netherlands), Matthias W Beckmann (BBCC: University Breast Center Franconia, Department of Gynecology and Obstetrics, University Hospital Erlangen, Friedrich-Alexander University Erlangen-Nuremberg, Comprehensive Cancer Center Erlangen-EMN, Erlangen, Germany), Peter A Fasching (BBCC: University Breast Center Franconia, Department of Gynecology and Obstetrics, University Hospital Erlangen, Friedrich-Alexander University Erlangen-Nuremberg, Comprehensive Cancer Center Erlangen-EMN, Erlangen, Germany ; David Geffen School of Medicine, Department of Medicine Division of Hematology and Oncology, University of California at Los Angeles, CA, USA), Julian Peto (BBCS: Non-communicable Disease Epidemiology Department, London School of Hygiene and Tropical Medicine, London, UK), Douglas F Easton (BCAC: Centre for Cancer Genetic Epidemiology, Department of Public Health and Primary Care and Department of Oncology, University of Cambridge, UK), Kyriaki Michailidou, Deborah J Thompson, Manjeet K Bolla, Qin Wang, Joe Dennis (BCAC: Centre for Cancer Genetic Epidemiology, Department of Public Health and Primary Care, University of Cambridge, UK), Jonathan Tyrer (BCAC: Centre for Cancer Genetic Epidemiology, Department of Oncology, University of Cambridge, UK), Pascal Guénel (CECILE: Inserm, CESP, Environmental Epidemiology of Cancer, Villejuif, France; University Paris-Sud, Villejuif, France) Stig E Bojesen (CGPS: Copenhagen General Population Study, Herlev Hospital, Copenhagen University Hospital, University of Copenhagen, Copenhagen, Denmark; Department of Clinical Biochemistry, Herlev Hospital, Copenhagen University Hospital, University of Copenhagen, Copenhagen, Denmark), Henrik Flyger (CGPS: Department of Breast Surgery, Herlev Hospital, Copenhagen University Hospital, Copenhagen, Denmark), Javier Benitez (CNIO-BCS: Human Genetics Group, Human Cancer Genetics Program, Spanish National Cancer Research Centre (CNIO), Madrid, Spain; Centro de Investigación en Red de Enfermedades Raras (CIBERER), Valencia, Spain), Hoda Anton-Culver (CTS: Department of Epidemiology, University of California Irvine, Irvine, California, USA), Hermann Brenner, Aida K Dieffenbach (ESTHER: Division of Clinical Epidemiology and Aging Research, German Cancer Research Center (DKFZ), Heidelberg, Germany; German Cancer Consortium (DKTK), Heidelberg, Germany), Hiltrud Brauch (GENICA: Dr. Margarete Fischer-Bosch-Institute of Clinical Pharmacology, Stuttgart; ; University of Tübingen, Germany), The GENICA Network (GENICA: Dr. Margarete Fischer-Bosch-

Institute of Clinical Pharmacology, Stuttgart; University of Tübingen, Germany; Molecular Genetics of Breast Cancer, Deutsches Krebsforschungszentrum, Heidelberg, Germany; Institute for Prevention and Occupational Medicine of the German Social Accident Insurance, Institute of the Ruhr-University Bochum, Germany; Institute for Occupational Medicine and Maritime Medicine, University Medical Center Hamburg-Eppendorf, Germany; Institute of Pathology, Medical Faculty of the University of Bonn, Germany; Department of Internal Medicine, Evangelische Kliniken Bonn gGmbH, Johanniter Krankenhaus, Bonn, Germany), Carl Blomqvist (HEBCS: Department of Oncology, University of Helsinki and Helsinki University Central Hospital, Helsinki, Finland), Heli Nevanlinna (HEBCS: Department of Obstetrics and Gynecology, University of Helsinki and Helsinki University Central Hospital, Helsinki, Finland), Annika Lindblom (KARBAC: Department of Molecular Medicine and Surgery, Karolinska Institutet, Stockholm, Sweden), Veli-Matti Kosma, Arto Mannermaa (KBCP: School of Medicine, Institute of Clinical Medicine, Pathology and Forensic Medicine, University of Eastern Finland, Kuopio, Finland; Imaging Center, Department of Clinical Pathology, Kuopio University Hospital, Kuopio, Finland), Georgia Chenevix-Trench (kConFab/AOCS: Department of Genetics, QIMR Berghofer Medical Research Institute, Brisbane, Australia), Australian Ovarian Cancer Study (kConFab/AOCS: QIMR Berghofer Medical Research Institute, Brisbane, Australia, and, Peter MacCallum Cancer Centre, St Andrews Place, East Melbourne, Victoria, Australia), kConFab (kConFab/AOCS: Peter MacCallum Cancer Centre, St Andrews Place, East Melbourne, Victoria, Australia), Diether Lambrechts (LMBC: Vesalius Research Center (VRC), VIB, Leuven, Belgium; Laboratory for Translational Genetics, Department of Oncology, University of Leuven, Leuven, Belgium), Patrick Neven (LMBC: Multidisciplinary Breast Cancer, University Hospital Leuven, Belgium), Jenny Chang-Claude, Anja Rudolph (MARIE: Division of Cancer Epidemiology, German Cancer Research Center (DKFZ), Heidelberg, Germany), Dieter Flesch-Janys (MARIE: Department of Cancer Epidemiology/Clinical Cancer Registry and Institute for Medical Biometrics and Epidemiology, University Clinic Hamburg-Eppendorf, Hamburg, Germany), Bernardo Bonanni (MBCSG: Division of Cancer Prevention and Genetics, Istituto Europeo di Oncologia (IEO), Milan, Italy), Paolo Peterlongo (MBCSG: IFOM, Fondazione Istituto FIRC di Oncologia Molecolare, Milan, Italy), Paolo Radice (MBCSG: Unit of Molecular Bases of Genetic Risk and Genetic Testing, Department of Preventive and Predictive Medicine, Fondazione IRCCS Istituto Nazionale dei Tumori (INT), Milan, Italy), Fergus J Couch (MCBCS: Department of Laboratory Medicine and Pathology, Mayo Clinic, Rochester, MN, USA), Graham G Giles (MCCS: Cancer Epidemiology Centre, The Cancer Council Victoria, Melbourne, Australia; Centre for Molecular, Environmental, Genetic, and Analytic Epidemiology, The University of Melbourne, Australia ), Roger L Milne (MCCS: Cancer Epidemiology Centre, The Cancer

Council Victoria, Melbourne, Australia; Centre for Molecular, Environmental, Genetic, and Analytic Epidemiology, The University of Melbourne, Australia), Katri Pylkäs (OBCS: Laboratory of Cancer Genetics and Tumor Biology, Department of Clinical Chemistry and Biocenter Oulu, University of Oulu, Oulu University Hospital/NordLab Oulu, Oulu, Finland), Robert Winqvist (OBCS: Laboratory of Cancer Genetics and Tumor Biology, Department of Clinical Chemistry and Biocenter Oulu, University of Oulu, Oulu University Hospital/NordLab Oulu, Oulu, Finland), Irene L Andrulis (OFBCR: Ontario Cancer Genetics Network, Lunenfeld-Tanenbaum Research Institute of Mount Sinai Hospital, Toronto, Ontario, Canada; Department of Molecular Genetics, University of Toronto, Toronto, Ontario, Canada ), Julia A Knight (OFBCR: Lunenfeld-Tanenbaum Research Institute of Mount Sinai Hospital, Toronto, Ontario, Canada; Division of Epidemiology, Dalla Lana School of Public Health, University of Toronto, Ontario, Canada); Peter Devillee (ORIGO: Department of Human Genetics & Department of Pathology, Leiden University Medical Center, The Netherlands), Montserrat García-Closas (PBCS: Division of Genetics and Epidemiology, Institute of Cancer Research, Sutton, Surrey, UK; Breakthrough Breast Cancer Research Centre, Division of Breast Cancer Research, The Institute of Cancer Research, London, UK)

## **7. Acknowledgements**

We thank all of the consortia and studies that provided results for this analysis.

Some consortia or studies require specific acknowledgement using standard text. Hence, we specifically thank:

-- The BRAVE study: the BRAVE study genetic epidemiology working group is a collaboration between the Cardiovascular Epidemiology Unit, Department of Public Health and Primary Care, University of Cambridge, UK, the Centre for Control of Chronic Diseases, icddr,b, Dhaka, Bangladesh and the National Institute of Cardiovascular Diseases, Dhaka, Bangladesh.

-- EPIC-CVD: CHD case ascertainment and validation, genotyping, and clinical chemistry assays in EPIC-CVD were principally supported by grants awarded to the University of Cambridge from the EU Framework Programme 7 (HEALTH-F2-2012-279233), the UK Medical Research Council (G0800270) and British Heart Foundation (SP/09/002) , and the European Research Council (268834). We thank all EPIC participants and staff for their contribution to the study, the laboratory teams at the Medical Research Council Epidemiology Unit for sample management and Cambridge Genomic Services for genotyping, Sarah Spackman for data management, and the team at the EPIC-CVD Coordinating Centre for study coordination and administration.

-- PROMIS: Field-work, genotyping, and standard clinical chemistry assays in PROMIS were principally supported by grants awarded to the University of Cambridge from the British Heart Foundation, UK Medical Research Council, Wellcome Trust, EU Framework 6-funded Bloodomics Integrated Project, Pfizer, Novartis, and Merck.

-- The Genotype-Tissue Expression (GTEx) Project was supported by the Common Fund of the Office of the Director of the National Institutes of Health. Additional funds were provided by the NCI, NHGRI, NHLBI, NIDA, NIMH, and NINDS. Donors were enrolled at Biospecimen Source Sites funded by NCI\SAIC-Frederick, Inc. (SAIC-F) subcontracts to the National Disease Research Interchange (10XS170), Roswell Park Cancer Institute (10XS171), and Science Care, Inc. (X10S172). The Laboratory, Data Analysis, and Coordinating Center (LDACC) was funded through a contract (HHSN268201000029C) to The Broad Institute, Inc. Biorepository operations were funded through an SAIC-F subcontract to Van Andel Institute (10ST1035). Additional data repository and project management were provided by SAIC-F (HHSN261200800001E). The Brain Bank was supported by a supplements to University of Miami grants DA006227 & DA033684 and to contract N01MH000028. Statistical Methods development grants were made to the



University of Geneva (MH090941 & MH101814), the University of Chicago (MH090951, MH090937, MH101820, MH101825), the University of North Carolina - Chapel Hill (MH090936 & MH101819), Harvard University (MH090948), Stanford University (MH101782), Washington University St Louis (MH101810), and the University of Pennsylvania (MH101822). The data used for the analyses described in this manuscript were obtained from: the GTEx Portal (web browser) on 23/07/2014.

-- The ALSPAC study: We are extremely grateful to all the families who took part in this study, the midwives for their help in recruiting them, and the whole ALSPAC team, which includes interviewers, computer and laboratory technicians, clerical workers, research scientists, volunteers, managers, receptionists and nurses. The UK Medical Research Council and the Wellcome Trust (Grant ref: 092731) and the University of Bristol provide core support for ALSPAC. GWAS data was generated by Sample Logistics and Genotyping Facilities at the Wellcome Trust Sanger Institute and LabCorp (Laboratory Corporation of America) using support from 23andMe

-- The UK10K consortium: This study makes use of data generated by the UK10K Consortium. Funding for UK10K was provided by the Wellcome Trust under award WT091310. Nicholas Timpson is supported by an MRC Grant MC\_UU\_12013/3.

- CARDIoGRAM, C4D and CARDIoGRAMplusC4D, downloaded from [www.CARDIOGRAMPLUSC4D.ORG](http://www.CARDIOGRAMPLUSC4D.ORG).

-- BHF-FHS/WTCCC study: CPN and NJS are funded by the British Heart Foundation and NJS is a NIHR Senior Investigator.

-- The CHS study: This CHS research was supported by NHLBI contracts HHSN268201200036C, HHSN268200800007C, N01HC55222, N01HC85079, N01HC85080, N01HC85081, N01HC85082, N01HC85083, N01HC85086; and NHLBI grants U01HL080295, R01HL087652, R01HL105756, R01HL103612, and R01HL120393 with additional contribution from the National Institute of Neurological Disorders and Stroke (NINDS). Additional support was provided through R01AG023629 and R01AG027236 from the National Institute on Aging (NIA). A full list of principal CHS investigators and institutions can be found at CHS-NHLBI.org.

The provision of genotyping data was supported in part by the National Center for Advancing Translational Sciences, CTSI grant UL1TR000124, and the National Institute of Diabetes and Digestive and Kidney Disease Diabetes Research Center (DRC) grant DK063491 to the Southern California Diabetes Endocrinology Research Center.

The content is solely the responsibility of the authors and does not necessarily represent the official views of the National Institutes of Health.

-- The Cleveland Clinic GeneBank was supported in part by National Institutes of Health grants P01HL098055, P01HL076491 and P20HL113452.

-- The German MI Family Studies I-V (GerMIFS I-V): These studies were supported by the German Federal Ministry of Education and Research (BMBF) in the context of the e:Med program (*e:AtheroSysMed*), the FP7 European Union project *CVgenes@target* (261123), and by the Fondation Leducq (CADgenomics: Understanding Coronary Artery Disease Genes, 12CVD02).

-- The HPS study: Population controls were used from the UK Twins Study and WTCCC2 National Blood Service collections

-- The Ottawa Heart Genomics Study was supported by the Canadian Institutes of Health Research #MOP82810, #MOP77682, the Canada Foundation for Innovation CFI #11966 and Heart & Stroke Foundation of Canada #NA6001, #NA6650.

-- The AAA study, which was funded by The Wellcome Trust (grant number 084695). This study makes use of data generated by the Wellcome Trust Case-Control Consortium. A full list of the investigators who contributed to the generation of the data is available from [www.wtccc.org.uk](http://www.wtccc.org.uk). Funding for the project was provided by the Wellcome Trust under award 076113 and 085475.

-- The eMERGE Network was funded by NHGRI, NIH, with additional funding from NIGMS through the following grants: U01HG004438 to Johns Hopkins University; U01HG004424 to The Broad Institute; U01HG004438 to CIDR; U01HG004610 and U01HG006375 to Group Health Cooperative; U01HG004608 to Marshfield Clinic; U01HG006389 to Essentia Institute of Rural Health; U01HG04599 and U01HG006379 to Mayo Clinic; U01HG004609 and U01HG006388 to Northwestern University; U01HG04603 and U01HG006378 to Vanderbilt University; U01HG006385 to the Coordinating Center; U01HG006382 to Geisinger Health System; and U01HG006380 to Icahn School of Medicine at Mount Sinai. More information on the eMERGE Network can be found at [www.gwas.org](http://www.gwas.org).

-- The DIAGRAM consortium: We are extremely grateful to the DIAGRAM consortium for making public the genetic association data with T2D. Summary statistics were extracted

from DIAGRAM v3 data (22885922) downloaded from <http://diagram-consortium.org/downloads.html>

-- The MAGIC consortium (glycaemic traits), downloaded from [www.magicinvestigators.org](http://www.magicinvestigators.org).

-- The International Genomics of Alzheimer's Project (IGAP) for providing summary results data for these analyses. The investigators within IGAP contributed to the design and implementation of IGAP and/or provided data but did not participate in analysis or writing of this report. IGAP was made possible by the generous participation of the control subjects, the patients, and their families. The i-Select chips was funded by the French National Foundation on Alzheimer's disease and related disorders. EADI was supported by the LABEX (laboratory of excellence program investment for the future) DISTALZ grant, Inserm, Institut Pasteur de Lille, Université de Lille 2 and the Lille University Hospital. GERAD was supported by the Medical Research Council (Grant n° 503480), Alzheimer's Research UK (Grant n° 503176), the Wellcome Trust (Grant n° 082604/2/07/Z) and German Federal Ministry of Education and Research (BMBF): Competence Network Dementia (CND) grant n° 01GI0102, 01GI0711, 01GI0420. CHARGE was partly supported by the NIH/NIA grant R01 AG033193 and the NIA AG081220 and AGES contract N01-AG-12100, the NHLBI grant R01 HL105756, the Icelandic Heart Association, and the Erasmus Medical Center and Erasmus University. ADGC was supported by the NIH/NIA grants: U01 AG032984, U24 AG021886, U01 AG016976, and the Alzheimer's Association grant ADGC-10-196728.

-- The Ankylosing spondylitis consortium: The The Wellcome Trust Case Control Consortium 2 project is funded by the Wellcome Trust (083948/z/07/Z). MAB is funded by a Senior Principal Research Fellowship from the National Health and Medical Research Council (Australia). DME is funded by an Australian Research Council Future Fellowship (FT130101709).

-- The AFGen Consortium: AFGen consortium is supported by NIH 2R01HL092577. The participation of Steven Lubitz was support by the NIH/NHLBI (K23HL114724) and a Doris Duke Charitable Foundation Clinical Scientist Development Award (2014105).

-- The CHARGE Heart Failure working group: ARIC Study: The ARIC Study is carried out as a collaborative study supported by National Heart, Lung, and Blood Institute (NHLBI) contracts (HHSN268201100005C, HHSN268201100006C, HHSN268201100007C, HHSN268201100008C, HHSN268201100009C, HHSN268201100010C,

HHSN268201100011C, and HHSN268201100012C), R01HL087641, R01HL59367 and R01HL086694; National Human Genome Research Institute contract U01HG004402; and National Institutes of Health contract HHSN268200625226C. The authors thank the staff and participants of the ARIC study for their important contributions; CHS: (see above); FHS: The FHS was supported by NHLBI (Contract No. N01-HC-25195) and its contract with Affymetrix, Inc for genotyping services (Contract No. N02-HL-6-4278). This work was also supported in part by grants from the NHLBI 2K24HL04334, R01HL077477, and R01HL093328 (all to RSV). A portion of this research utilized the Linux Cluster for Genetic Analysis (LinGA-II) funded by the Robert Dawson Evans Endowment of the Department of Medicine at Boston University School of Medicine and Boston Medical Center. The analyses reflect intellectual input and resource development from the FHS investigators participating in the SNP Health Association Resource (SHARe) project; RS: The GWAS database of the Rotterdam Study was funded through the Netherlands Organization of Scientific Research NWO (nr. 175.010.2005.011, 911.03.012) and the Research Institute for Diseases in the Elderly (RIDE). This study was supported by the Netherlands Genomics Initiative (NGI)/NWO project number 050 060 810 (Netherlands Consortium for Healthy Ageing). The Rotterdam Study is supported by the Erasmus Medical Center and Erasmus University, Rotterdam, the Netherlands organization for scientific research (NWO), the Netherlands Organization for the Health Research and Development (ZonMw), the Research Institute for Diseases in the Elderly (RIDE), the Netherlands Heart Foundation, the Ministry of Education, Culture, and Science, the Ministry of Health, Welfare, and Sports, the European Commission (DG XII) and the Municipality of Rotterdam. J.F.F. and A.D. were supported by the Netherlands Organization for Scientific Research (NWO, VICI no. 918-808 76-619 to JCM Witteman). For a full list of CHARGE-HF working group members contributing to this work, please see PMID 20445134.

-- The International Inflammatory Bowel Disease Genetics Consortium for sharing summary results and specifically Jeff Barrett.

-- The Consortium for Juvenile Arthritis Genetics: SDT was supported by the National Institutes of Health P01-AR048929 and P30-047363 and the Arthritis Foundation

- the International Multiple Sclerosis Genetics Consortium (IMSGC) and the Wellcome Trust Case Control Consortium 2 (WTCCC2) and Stephen Sawcer for providing summary results for these analyses.

-- arcOGEN was funded by a special purpose grant from Arthritis ResearchUK (grant 18030). KP and EZ were supported by the Wellcome Trust (grant 098051)

-- The International Parkinson's Disease Consortium: We would like to thank all of the subjects who donated their time and biological samples to be a part of this study.

This work was supported in part by the Intramural Research Programs of the National Institute of Neurological Disorders and Stroke (NINDS), the National Institute on Aging (NIA), and the National Institute of Environmental Health Sciences both part of the National Institutes of Health, Department of Health and Human Services; project numbers Z01-AG000949-02 and Z01-ES101986. In addition this work was supported by the Department of Defense (award W81XWH-09-2-0128), and The Michael J Fox Foundation for Parkinson's Research. This work was supported by National Institutes of Health grants R01NS037167, R01CA141668, P50NS071674, American Parkinson Disease Association (APDA); Barnes Jewish Hospital Foundation; Greater St Louis Chapter of the APDA; Hersenstichting Nederland; Neuroscience Campus Amsterdam; and the section of medical genomics, the Prinses Beatrix Fonds. The KORA (Cooperative Research in the Region of Augsburg) research platform was started and financed by the Forschungszentrum für Umwelt und Gesundheit, which is funded by the German Federal Ministry of Education, Science, Research, and Technology and by the State of Bavaria. This study was also funded by the German National Genome Network (NGFNplus number 01GS08134, German Ministry for Education and Research); by the German Federal Ministry of Education and Research (NGFN 01GR0468, PopGen); and 01EW0908 in the frame of ERA-NET NEURON and Helmholtz Alliance Mental Health in an Ageing Society (HA-215), which was funded by the Initiative and Networking Fund of the Helmholtz Association. The French GWAS work was supported by the French National Agency of Research (ANR-08-MNP-012). This study was also funded by France-Parkinson Association, the French program "Investissements d'avenir" funding (ANR-10-IAIHU-06) and a grant from Assistance Publique-Hôpitaux de Paris (PHRC, AOR-08010) for the French clinical data. This study was also sponsored by the Landspítali University Hospital Research Fund (grant to SSv); Icelandic Research Council (grant to SSv); and European Community Framework Programme 7, People Programme, and IAPP on novel genetic and phenotypic markers of Parkinson's disease and Essential Tremor (MarkMD), contract number PIAP-GA-2008-230596 MarkMD (to HP and JHu). This study utilized the high-performance computational capabilities of the Biowulf Linux cluster at the National Institutes of Health, Bethesda, Md. (<http://biowulf.nih.gov>), and DNA panels, samples, and clinical data from the National Institute of Neurological Disorders and Stroke Human Genetics Resource Center DNA and Cell Line Repository. People who contributed samples are acknowledged in descriptions of every panel on the repository website. We thank the

French Parkinson's Disease Genetics Study Group and the Drug Interaction with genes (DIGPD) study group: Y Agid, M Anheim, A-M Bonnet, M Borg, A Brice, E Broussolle, J-C Corvol, P Damier, A Destée, A Dürr, F Durif, A Elbaz, D Grabil, S Klebe, P. Krack, E Lohmann, L. Lacomblez, M Martinez, V Mesnage, P Pollak, O Rascol, F Tison, C Tranchant, M Vérin, F Viallet, and M Vidailhet. We also thank the members of the French 3C Consortium: A Alépérovitch, C Berr, C Tzourio, and P Amouyel for allowing us to use part of the 3C cohort, and D Zelenika for support in generating the genome-wide molecular data. We thank P Tienari (Molecular Neurology Programme, Biomedicum, University of Helsinki), T Peuralinna (Department of Neurology, Helsinki University Central Hospital), L Myllykangas (Folkhalsan Institute of Genetics and Department of Pathology, University of Helsinki), and R Sulkava (Department of Public Health and General Practice Division of Geriatrics, University of Eastern Finland) for the Finnish controls (Vantaa85+ GWAS data). We used genome-wide association data generated by the Wellcome Trust Case-Control Consortium 2 (WTCCC2) from UK patients with Parkinson's disease and UK control individuals from the 1958 Birth Cohort and National Blood Service. Genotyping of UK replication cases on ImmunoChip was part of the WTCCC2 project, which was funded by the Wellcome Trust (083948/Z/07/Z). UK population control data was made available through WTCCC1. This study was supported by the Medical Research Council and Wellcome Trust disease centre (grant WT089698/Z/09/Z to NW, JHa, and ASc). As with previous IPDGC efforts, this study makes use of data generated by the Wellcome Trust Case-Control Consortium. A full list of the investigators who contributed to the generation of the data is available from [www.wtccc.org.uk](http://www.wtccc.org.uk). Funding for the project was provided by the Wellcome Trust under award 076113, 085475 and 090355. This study was also supported by Parkinson's UK (grants 8047 and J-0804) and the Medical Research Council (G0700943). We thank Jeffrey Barrett for assistance with the design of the ImmunoChip. DNA extraction work that was done in the UK was undertaken at University College London Hospitals, University College London, who received a proportion of funding from the Department of Health's National Institute for Health Research Biomedical Research Centres funding. This study was supported in part by the Wellcome Trust/Medical Research Council Joint Call in Neurodegeneration award (WT089698) to the Parkinson's Disease Consortium (UKPDC), whose members are from the UCL Institute of Neurology, University of Sheffield, and the Medical Research Council Protein Phosphorylation Unit at the University of Dundee.

-- The Type-1 diabetes genetics studies: We thank all participating subjects and families who volunteered to participate in these studies. Funding: The JDRF and the Canadian

Institutes of Health Research. This work was funded in part by NIH grant DP3 DK085708 (HH).

-- The Breast Cancer Association Consortium: The BCAC is funded by CR-UK (C1287/A10118 and C1287/A12014). Meetings of the BCAC have been funded by the European Union COST programme (BM0606). D.F.E. is a Principal Research Fellow of CR-UK. Funding for the iCOGS infrastructure came from: the European Community's Seventh Framework Programme under grant agreement n° 223175 (HEALTH-F2-2009-223175) (COGS), Cancer Research UK (C1287/A10118, C1287/A 10710, C12292/A11174, C1281/A12014, C5047/A8384, C5047/A15007, C5047/A10692), the National Institutes of Health (CA128978) and Post-Cancer GWAS initiative (1U19 CA148537, 1U19 CA148065 and 1U19 CA148112 - the GAME-ON initiative), the Department of Defence (W81XWH-10-1-0341), the Canadian Institutes of Health Research (CIHR) for the CIHR Team in Familial Risks of Breast Cancer, Komen Foundation for the Cure, the Breast Cancer Research Foundation, and the Ovarian Cancer Research Fund.

-- Childhood acute lymphoblastoid lymphoma study: Funded by Tumorzentrum Heidelberg-Mannheim, European Union (EU Food-CT-2005-016320 and Health-F3-2007-200767), Leukemia Lymphoma Research, Kay Kendal Leukemia Fund, Cancer Research UK (C1298/A8362), and Deutsche Krebshilfe.

-- Chronic lymphocytic leukaemia study: Funded by Leukaemia Lymphoma Research Fund (LRF05001, 06002 and 13044), Cancer Research UK (C1298/A8362), the Arbib Fund.

-- Colorectal cancer study: Funded by C10195/A12996/Cancer Research UK; C10314/A4886/Cancer Research UK; C1298/A8362/Cancer Research UK; C31250/A10107/Cancer Research UK; C348/A12076/Cancer Research UK; C490/A10124/Cancer Research UK; MC\_U122861325/Medical Research Council; MC\_U127527198/Medical Research Council; Biotechnology and Biological Sciences Research Council

-- Lung cancer study: Funded by Cancer Research UK (C1298/A8780 and C1298/A8362), HEAL and Sanofi-Aventis.

-- Multiple Myeloma study: Funded by Myeloma UK, Leukaemia Lymphoma Research, Cancer Research UK (C1298/A8362). Dietmar-Hopp-Stiftung in Walldorf, German

Ministry of Education and Science (CLIOMMICS 01ZX1309B), German Cancer Aid, the University Hospital Heidelberg, the German Ministry of Education and Science, and the German Research Council (Projects SI 236/8-1, SI236/9-1, and ER 155/6-1).

-- Renal cell carcinoma study: Funded by Medical Research Council (MRC), educational grant from Bayer, Cancer Research UK (C1298/A8362).

-- Melanoma consortium: The GenoMEL study was funded by the European Commission under the 6th Framework Programme (contract no. LSHC-CT-2006-018702), by Cancer Research UK Programme Awards (C588/A4994 and C588/A10589), by a Cancer Research UK Project Grant (C8216/A6129) and by a grant from the US National Institutes of Health (NIH; CA83115). This research was also supported by the intramural Research Program of the NIH, National Cancer Institute (NCI), Division of Cancer Epidemiology and Genetics.

-- The tuberculosis study, which was supported by the Wellcome Trust grants 088838/Z/09/Z and 095198/Z/10/Z, the EU Framework Programme 7 Collaborative grant 201483, the European Research Council Starting grant 260477, and the Royal Society grants UF0763346 and RG090638. Sergey Nejentsev is a Wellcome Trust Senior Research Fellow in Basic Biomedical Science and is also supported by the National Institute for Health Research (NIHR) Cambridge Biomedical Research Centre.

-- The CHARGE HAEMATOLOGY working group: This research was made possible by NIA/NIH contract AG000932-02 (2009) Characterization of Normal Genomic Variability. This study utilized the high-performance computational capabilities of the Biowulf Linux cluster at the National Institutes of Health, Bethesda, MD (<http://biowulf.nih.gov>). The Age, Gene/Environment Susceptibility Reykjavik Study was funded by NIH contract N01-AG-12100, the NIA Intramural Research Program, Hjartavernd (the Icelandic Heart Association) and the Althingi (the Icelandic Parliament). The Atherosclerosis Risk in Communities Study is carried out as a collaborative study supported by National Heart, Lung, and Blood Institute contracts HHSN268201100005C, HHSN268201100006C, HHSN268201100007C, HHSN268201100008C, HHSN268201100009C, HHSN268201100010C, HHSN268201100011C, and HHSN268201100012C, N01-HC-55015, N01-HC-55016, N01-HC-55018, N01-HC-55019, N01-HC-55020, N01-HC-55021, N01-HC-55022 and grants R01HL087641, R01HL59367 and R01HL086694; National Human Genome Research Institute contract U01HG004402; and National Institutes of Health contract HHSN268200625226C. Infrastructure was partly supported by Grant Number UL1RR025005, a component of the National Institutes of Health and NIH Roadmap for Medical Research. The BLSA was supported in part by the Intramural



Research Program of the NIH, National Institute on Aging. A portion of that support was through a R&D contract with MedStar Research Institute. The National Heart, Lung, and Blood Institute's Framingham Heart Study is a joint project of the National Institutes of Health and Boston University School of Medicine and was supported by the National Heart, Lung, and Blood Institute's Framingham Heart Study (contract No. N01-HC-25195) and its contract with Affymetrix for genotyping services (contract No. N02-HL-6-4278). Analyses reflect the efforts and resource development from the Framingham Heart Study investigators participating in the SNP Health Association Resource (SHARe) project. A portion of this research was conducted using the Linux Cluster for Genetic Analysis (LinGA-II) funded by the Robert Dawson Evans Endowment of the Department of Medicine at Boston University School of Medicine and Boston Medical Center. The Health ABC Study was supported in part by the Intramural Research Program of the NIH, National Institute on Aging, NIA contracts N01AG62101, N01AG62103 and N01AG62106. The genome-wide association study was funded by NIA grant 1R01AG032098-01A1 to Wake Forest University Health Sciences, and genotyping services were provided by the Center for Inherited Disease Research (CIDR). CIDR is fully funded through a federal contract from the National Institutes of Health to The Johns Hopkins University, contract number HHSN268200782096C. The InChianti Study was supported as a 'targeted project' (ICS 110.1RS97.71) by the Italian Ministry of Health, by the U.S. National Institute on Aging (Contracts N01-AG-916413, N01-AG-821336, 263 MD 9164 13 and 263 MD 821336), and in part by the Intramural Research Program, National Institute on Aging, National Institutes of Health, USA. The GWAS database of the Rotterdam Study was funded through the Netherlands Organization of Scientific Research NWO (nr. 175.010.2005.011, 911.03.012) and the Research Institute for Diseases in the Elderly (RIDE). This study was supported by the Netherlands Genomics Initiative (NGI)/NWO project number 050 060 810 (Netherlands Consortium for Healthy Ageing). The Rotterdam Study is supported by the Erasmus Medical Center and Erasmus University, Rotterdam, the Netherlands organization for scientific research (NWO), the Netherlands Organization for the Health Research and Development (ZonMw), the Research Institute for Diseases in the Elderly (RIDE), the Netherlands Heart Foundation, the Ministry of Education, Culture, and Science, the Ministry of Health, Welfare, and Sports, the European Commission (DG XII) and the Municipality of Rotterdam. J.F.F. and A.D. were supported by the Netherlands Organization for Scientific Research (NWO, VICI no. 918-76-619). The participation of A.P.R. was supported by National Heart, Lung, and Blood Institute grant R01 HL-071862.
